# Supplementary material for: Titanium-mediated rearrangement of cyclopropenylmethyl acetates to (E)-halodienes
Source: Royal Society of Chemistry journal article supplement (doi:10.1039/c0ob01046d), 2011-01-01
Supplement: c0ob01046d.pdf [file c0ob01046d.pdf]

# Supporting Information

## A Titanium-Mediated Rearrangement of Cyclopropenylmethyl Acetates to (*E*)- Halodienes

Gary Gallego, Alireza Ariaifard\*, Kiet Tran, David Sandoval, Leera Choi, Yi-Hsun Chen,  
Brian F. Yates, Fu-Ming Tao and Christopher J. T. Hyland\*.

### Table of Contents

General Information – **S-2**

Starting Materials – **S-2**

Reaction of cyclopropenyl acetates with TiCl<sub>4</sub> and TiBr<sub>4</sub> – **S-22**

X-Ray structures for **5a** – **S-38**

Computational details and cartesian coordinates and total energies for all of the calculated structures – **S-46**

Figure S1: Figure 1 from manuscript redrawn with potential energy values – **S-60**

## General Procedures

Unless otherwise stated all reactions were carried out under an argon or nitrogen atmosphere in flame-dried glassware. Reactions were monitored by TLC using glass-backed silica gel XHL plates (purchased from Sorbtech with UV 254, thickness 250  $\mu$ m) or by GC and GC/MS on an Agilent 7890 (FID detector and HP-5 column 30 m x 0.32 mm 0.25 micron, part number: 19091j-413) and Varian 3900/Saturn 2100T (ion-trap mass-selective detector and, FactorFour capillary column VF-5ms, 30m x 0.25 micrometers, Part number: cp8944) respectively. Compounds were purified using flash column chromatography with Sorbtech silica gel or by radial chromatography with a Chromatotron®. Chromatography plates employed on the Chromatotron® were 1 mm or 2 mm prepared from a mixture of calcium sulfate hemihydrate and Aldrich Silica gel (TLC standard grade, without binder, with fluorescent indicator). NMR spectra were recorded on a BrukerAvance DRX-400 (400 MHz) in  $\text{CDCl}_3$  unless otherwise noted.  $\text{CDCl}_3$  was stored over  $\text{K}_2\text{CO}_3$  or 4Å molecular sieves and was purchased from Acros. Melting points are uncorrected and measure on a Thomas Hoover Unimeltcapillary melting point apparatus. IR spectra were recorded on a Thermo electron corporation Nicolet 380 FT-IR as films on NaCl plates (liquids) or in a NaCl solution cells (solids). Accurate mass measurements were recorded at the University of California, Riverside High Resolution Mass Spectrometry Facility and at the University of California, Irvine. X-ray analyses were carried out at the W.M. Keck Foundation Center for Molecular Structure in California State University, Fullerton. *n*BuLi was purchased from Strem and titrated against diphenylacetic acid prior to use. Other reagents were commercially available and used without further purification.

## Synthesis of Starting Materials

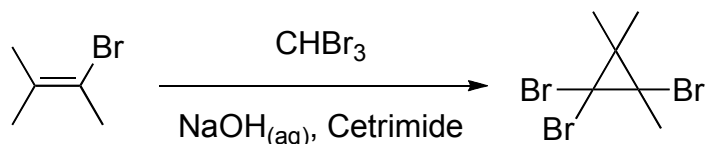

**1,1,2-Tribromo-2,3,3-trimethylcyclopropane:**<sup>1</sup> 2-bromo-3-methylbut-2-ene (10 mL, 86.15 mmol, 1.0 equiv) and bromoform (143 mL, 1637 mmol, 19 equiv) were mixed together. Solid NaOH (43.9 g, 1077 mmol, 12.5 equiv) was then dissolved in water (43 mL). The resulting NaOH solution was added to the

<sup>1</sup> Prepared according to the procedure reported by Baird and co-workers: Baird, M. S.; Hussain, H. H.; Nethercott, W. *J. Chem. Soc. Perkin Trans.* **1986**, *1*, 1845

bromoform solution followed by centrimide (1.28 g) and a condenser fitted to the flask. The mixture was then heated to 65 °C and allowed to stir at that temperature for 3 hours. After cooling, the organic layer was separated and the aqueous phase extracted with CH<sub>2</sub>Cl<sub>2</sub> (3 x 100 mL). The combined organic layers were washed with water (100 mL), dried (MgSO<sub>4</sub>) and evaporated to dryness. The crude product was then recrystallized from hot EtOH employing charcoal to decolorize the solution. In total three crops of crystals were collected (16.0 g, 49.97 mmol, 58% yield). Spectroscopic data was in agreement with the literature<sup>1</sup>: <sup>1</sup>H NMR (400 MHz, CDCl<sub>3</sub>) δ 2.03 (s, 3H), 1.54 (3, 3H), 1.39 (s, 3H). <sup>13</sup>C NMR (100 MHz, CDCl<sub>3</sub>) δ 51.5, 51.0, 33.0, 27.0, 26.6, 20.9.

**General preparation of cyclopropenyl alcohols:** To a flame-dried Schlenk flask was added 1,1,2-tribromo-2,3,3-trimethylcyclopropane (2.0 g, 6.2 mmols, 1.0 equiv.). The flask was then evacuated and filled with argon and then diethyl ether (12 ml) was added. The resulting solution was cooled to -78°C in a dry ice-acetone bath and *n*-butyllithium (11.8 ml of a 1.56 M solution in hexane, 11.8 mmols, 1.9 equiv) added dropwise. After 10 mins at -78°C the reaction was warmed to -10°C by replacing the dry ice-acetone bath with an ice-acetone bath. After 1 h the reaction was cooled again to -20°C and the aldehyde (7.4 mmols, 1.2 equiv) added dropwise. The cooling bath was then removed and the reaction allowed to warm to rt and the reaction monitored by TLC. Reactions were generally complete in 2 h and were quenched by addition of NH<sub>4</sub>Cl (20 ml of a saturated aqueous solution). The organic phase was separated and the aqueous phase extracted with diethyl ether (3 x 20 ml) and the combined organics dried (Na<sub>2</sub>SO<sub>4</sub>) and concentrated under reduced pressure. Chromatography (90:10 hexanes: ethyl acetate) was then carried out on SiO<sub>2</sub> pretreated with the eluant and ~1% Et<sub>3</sub>N.

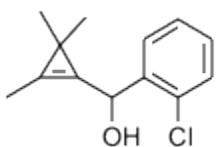

**(2-chlorophenyl)(2,3,3-trimethylcycloprop-1-enyl)methanol** was obtained as a clear oil (230 mg, 85%). <sup>1</sup>H NMR (400 MHz, CDCl<sub>3</sub>) δ 7.59 (dd, *J* = 2.0, 8.0 Hz, 1H), 7.35 (dd, *J* = 2.0, 8.0 Hz, 1H), 7.30 (dt, *J* = 2.0, 8.0 Hz, 1H), 7.22 (dt, *J* = 2.0, 8.0 Hz, 1H), 6.05 (br s, 1H), 2.19 (d, *J* = 4.0 Hz, 1H), 1.97 (d, *J* = 1.5 Hz, 3H), 1.09 (s, 3H), 1.02 (s, 3H); <sup>13</sup>C NMR (101 MHz, CDCl<sub>3</sub>) δ 139.37, 131.97, 129.40, 128.64, 127.55, 127.01, 123.97, 123.91, 67.84, 25.69, 25.29, 22.38, 8.69. IR 3598 cm<sup>-1</sup>. HRMS-ESI (*m/z*): (M + H)<sup>+</sup>calcd for C<sub>13</sub>H<sub>15</sub>ClO, 222.0811; found, 223.0876.

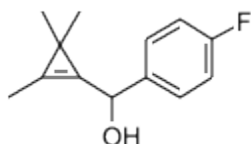

**(4-fluorophenyl)(2,3,3-trimethylcycloprop-1-enyl)methanol** was obtained as a pale yellow oil (560 mg, 65%). <sup>1</sup>H NMR (400 MHz, CDCl<sub>3</sub>) δ 7.40 (dd, *J* = 12, 4 Hz, 2H), 7.09 – 7.02 (m, 2H), 5.66 (s, 1H), 2.16 (br s, 1H), 2.00 (d, *J* = 1.5 Hz, 3H), 1.13 (s, 3H), 1.07 (s, 3H); <sup>13</sup>C NMR (101 MHz, CDCl<sub>3</sub>) 161.8 (d,

$J = 242$  Hz) 137.9, 128.0 (d,  $J = 8.5$  Hz), 124.9, 123.8, 115.0 (d,  $J = 22$  Hz) 69.9, 25.5, 21.9, 8.5. IR 3368  $\text{cm}^{-1}$  HRMS-ESI ( $m/z$ ): ( $M - H$ )<sup>+</sup>calcd for  $\text{C}_{13}\text{H}_{15}\text{FO}$ , 205.1029 found, 205.1023.

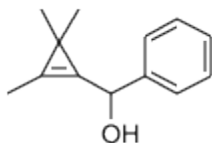

**phenyl(2,3,3-trimethylcycloprop-1-enyl)methanol** was obtained as a yellow oil (523 mg, 66%).  $^1\text{H}$  NMR (400 MHz,  $\text{CDCl}_3$ )  $\delta$  7.46 – 7.36 (m, 4H), 7.34 – 7.29 (m, 1H), 5.69 (s, 1H), 2.27 (br s, 1H), 2.02 (d,  $J = 1.5$  Hz, 3H), 1.16 (s, 3H), 1.09 (s, 3H).  $^{13}\text{C}$  NMR (101 MHz,  $\text{CDCl}_3$ )  $\delta$  142.1, 128.4, 127.6, 126.3, 125.0, 123.4, 70.7, 25.6, 21.9, 8.6. IR 3368  $\text{cm}^{-1}$ . In agreement with reported data.<sup>2</sup>

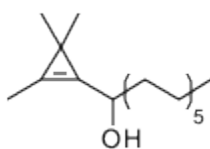

**1-(2,3,3-trimethylcycloprop-1-enyl)dodecan-1-ol** was obtained as a clear oil (280 mg, 68%).  $^1\text{H}$  NMR (400 MHz,  $\text{CDCl}_3$ )  $\delta$  4.61 (t,  $J = 6.0$  Hz, 1H), 2.01 (d,  $J = 1.5$  Hz, 3H), 1.67-1.60 (m, 2H), 1.43-1.27 (m, 18H), 1.13 (s, 6H), 0.89 (t,  $J = 7.0$  Hz, 3H);  $^{13}\text{C}$  NMR (101 MHz,  $\text{CDCl}_3$ )  $\delta$  125.33, 121.63, 68.70, 36.56, 31.89, 29.62, 29.61, 29.58, 29.56, 29.32, 25.98, 25.71, 25.31, 22.64, 21.09, 14.00, 8.63. IR 3367  $\text{cm}^{-1}$ . HRMS-ESI ( $m/z$ ): ( $M + H$ )<sup>+</sup>calcd for  $\text{C}_{18}\text{H}_{34}\text{O}$ , 265.2526; found, 265.2523.

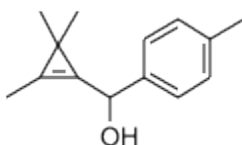

***p*-tolyl(2,3,3-trimethylcycloprop-1-enyl)methanol** was obtained as a pale yellow oil (870 mg, 85%).  $^1\text{H}$  NMR (400 MHz,  $\text{CDCl}_3$ )  $\delta$  7.33 (d,  $J = 8.0$ , 2H), 7.20 (d,  $J = 8.0$ , 2H), 5.65 (s, 1H), 2.39 (s, 3H), 2.03 (d,  $J = 1.4$ , 3H), 1.17 (s, 3H), 1.11 (s, 3H).  $^{13}\text{C}$  NMR (101 MHz,  $\text{CDCl}_3$ ) 139.22, 137.26, 129.07, 126.4, 125.04, 123.05, 70.55, 25.76, 25.54, 21.82, 21.16, 8.64. IR 3366  $\text{cm}^{-1}$  HRMS-ESI ( $m/z$ ): ( $M + H$ )<sup>+</sup>calcd for  $\text{C}_{14}\text{H}_{17}\text{O}$ , 201.1274; found 201.1270.

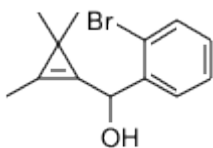

**(2-bromophenyl)(2,3,3-trimethylcycloprop-1-enyl)methanol** was obtained as a clear oil (1.49 g, 90%).  $^1\text{H}$  NMR (400 MHz,  $\text{CDCl}_3$ )  $\delta$  7.60 (dd,  $J = 8.0$ , 2.0 Hz, 1H), 7.55 (dd,  $J = 8.0$ , 2.0 Hz, 1H), 7.34 (dt,  $J = 8.0$ , 1.5 Hz, 1H), 7.15

<sup>2</sup> Samah, S.; Masarwa, A.; Zohar, E.; Stanger, A.; Bertus, P.; Marek, I. *Chem.-Eur. J.* **2009**, *15*, 8449.

(dt,  $J = 8.0, 2.0$  Hz, 1H), 6.03 (s, 1H) 2.36 (br s, 1H), 1.99 (d,  $J = 1.5$  Hz, 3H), 1.10 (s, 3H).  $^{13}\text{C}$  NMR (101 MHz,  $\text{CDCl}_3$ )  $\delta$  141.0, 132.7, 129.0, 127.8, 127.6, 124.0, 123.9, 121.9, 70.1, 25.7, 25.3, 22.3, 8.7. IR 3368, 1855, 749  $\text{cm}^{-1}$ . HRMS-ESI ( $m/z$ ): ( $M + H$ ) $^+$  calcd for  $\text{C}_{13}\text{H}_{15}\text{BrO}$ , 265.0223; found, 265.0226.

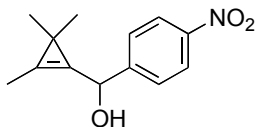

**(4-nitrophenyl)(2,3,3-trimethylcycloprop-1-enyl)methanol** was obtained as a yellow solid (800 mg, 95%). Mp: 61.0-62.0 °C.  $^1\text{H}$  NMR (400 MHz,  $\text{CDCl}_3$ )  $\delta$  8.22 (d,  $J = 9.0$  Hz, 2H), 7.60 (d,  $J = 9.0$  Hz, 2H), 5.80 (s, 1H), 2.20 (br s, 1H), 1.99 (d,  $J = 1.5$  Hz, 3H), 1.11 (s, 3H), 1.05 (s, 3H).  $^{13}\text{C}$  NMR (101 MHz,  $\text{CDCl}_3$ )  $\delta$  149.3, 147.4, 128.8, 125.0, 124.2, 123.7, 69.7, 25.6, 22.1, 8.6. IR 3598, 1605, 1525, 1347  $\text{cm}^{-1}$ . HRMS-ESI ( $m/z$ ): ( $M + H$ ) $^+$  calcd for  $\text{C}_{13}\text{H}_{16}\text{NO}_3$ , 234.1125; found, 234.1132.

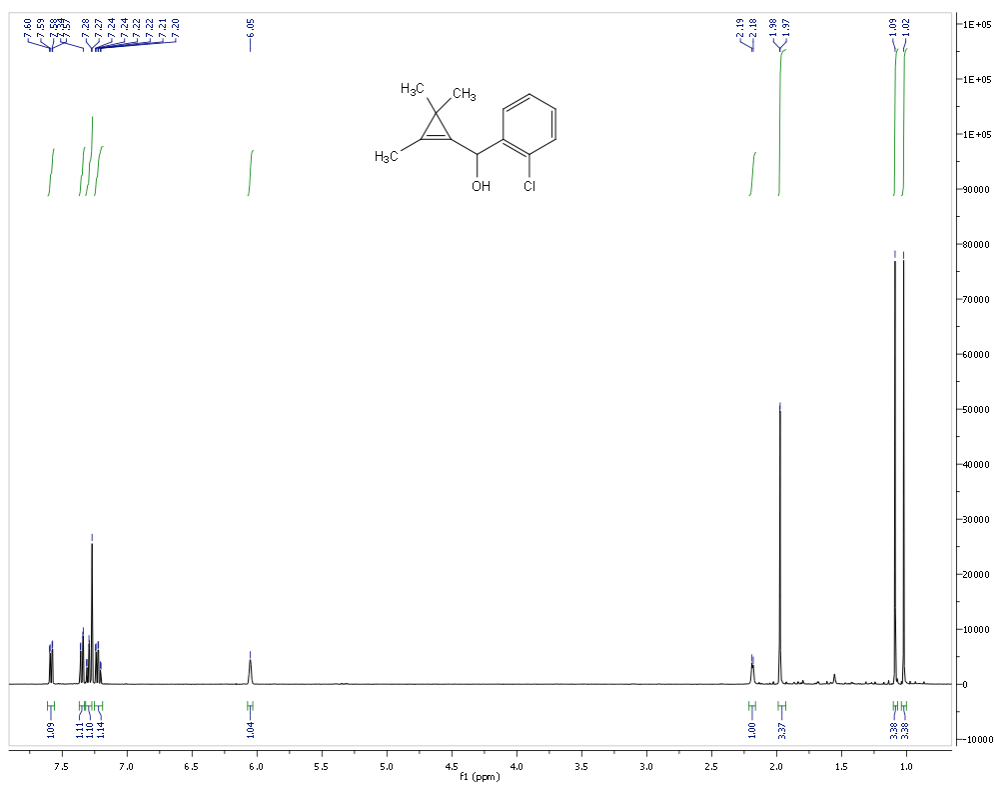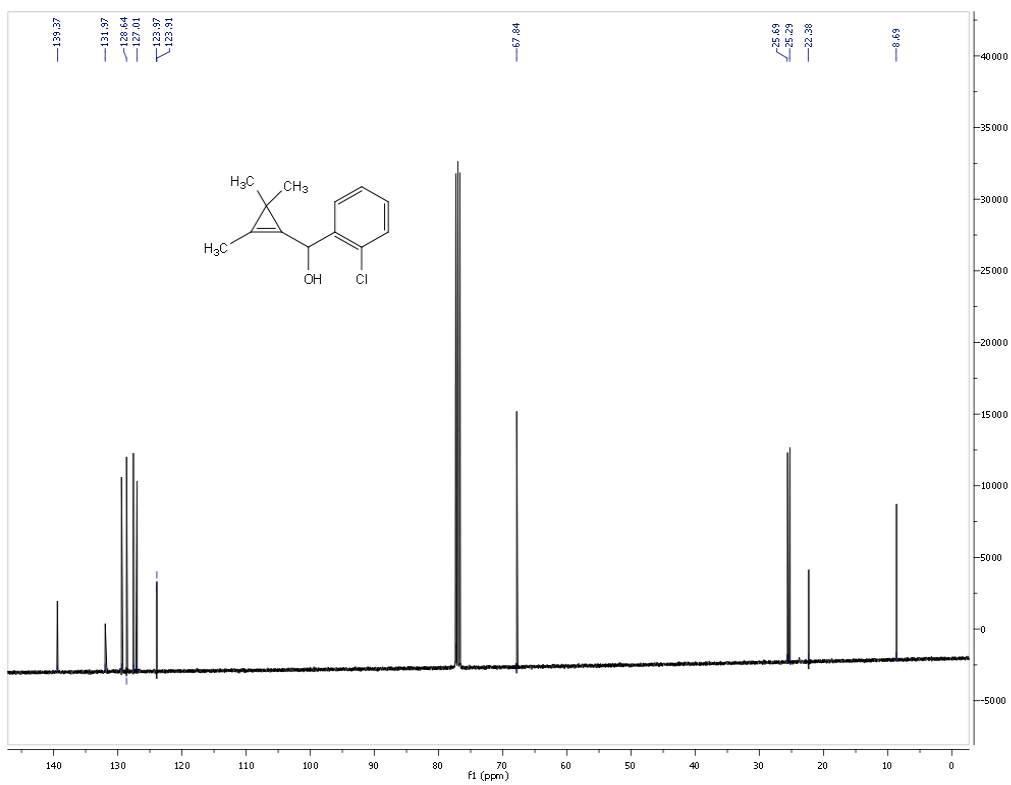

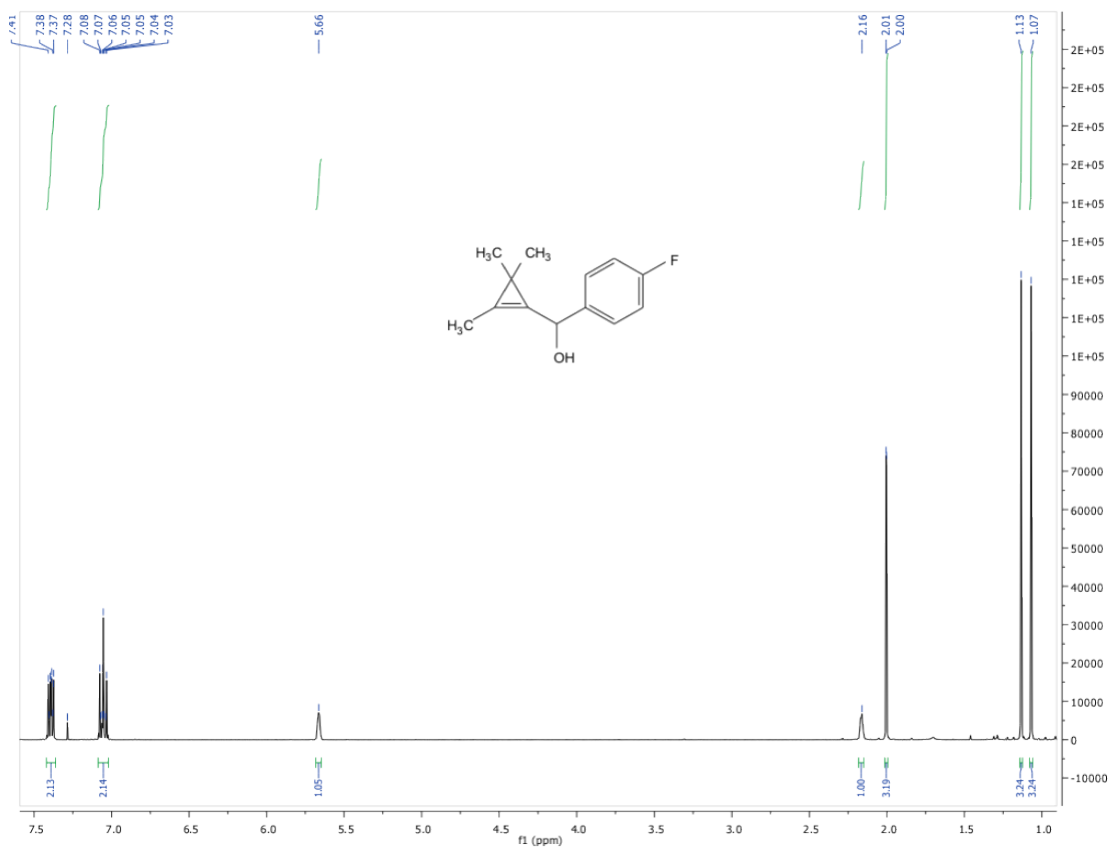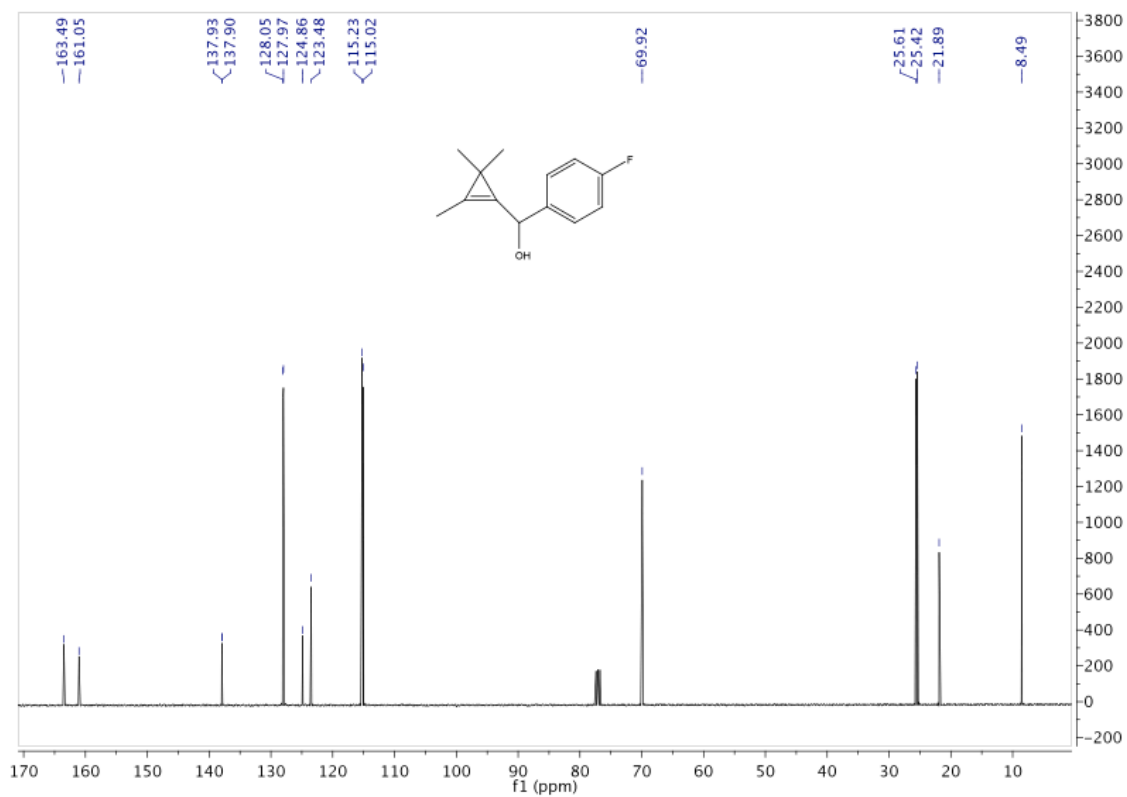

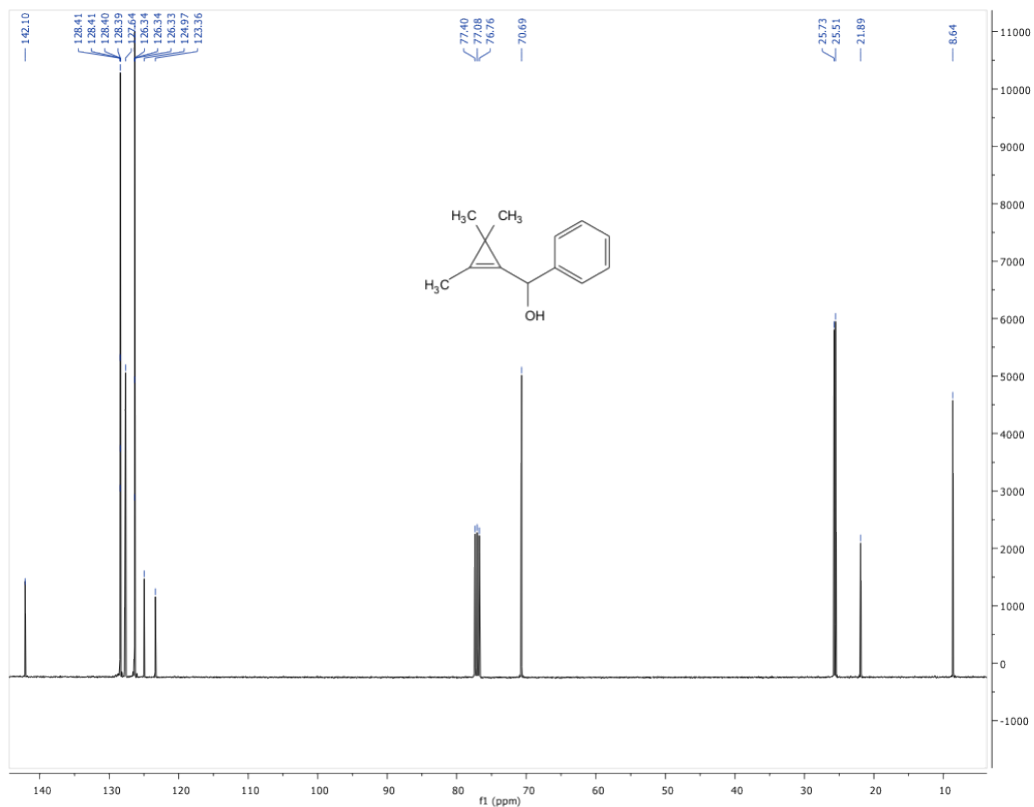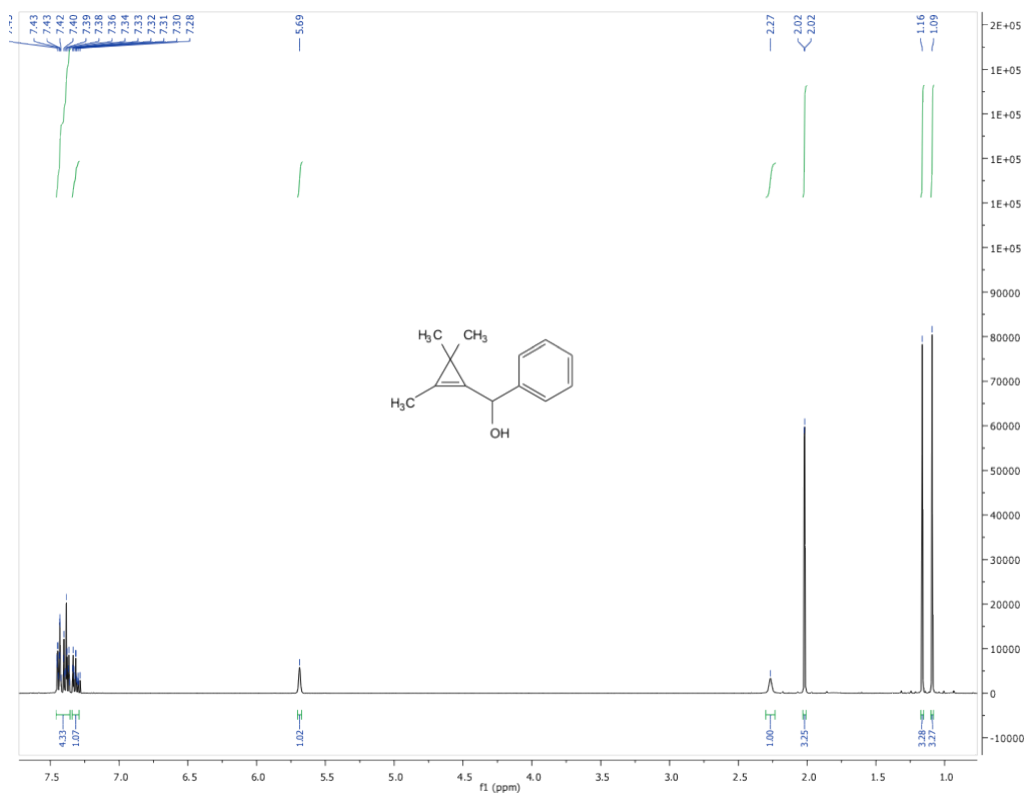



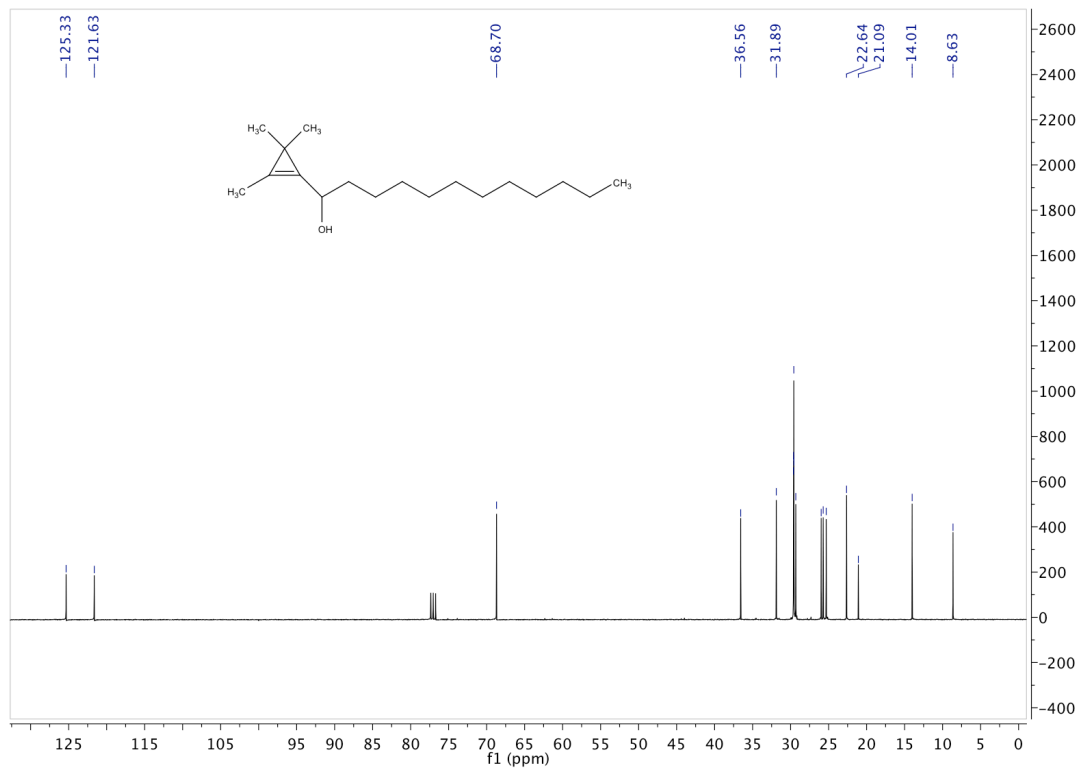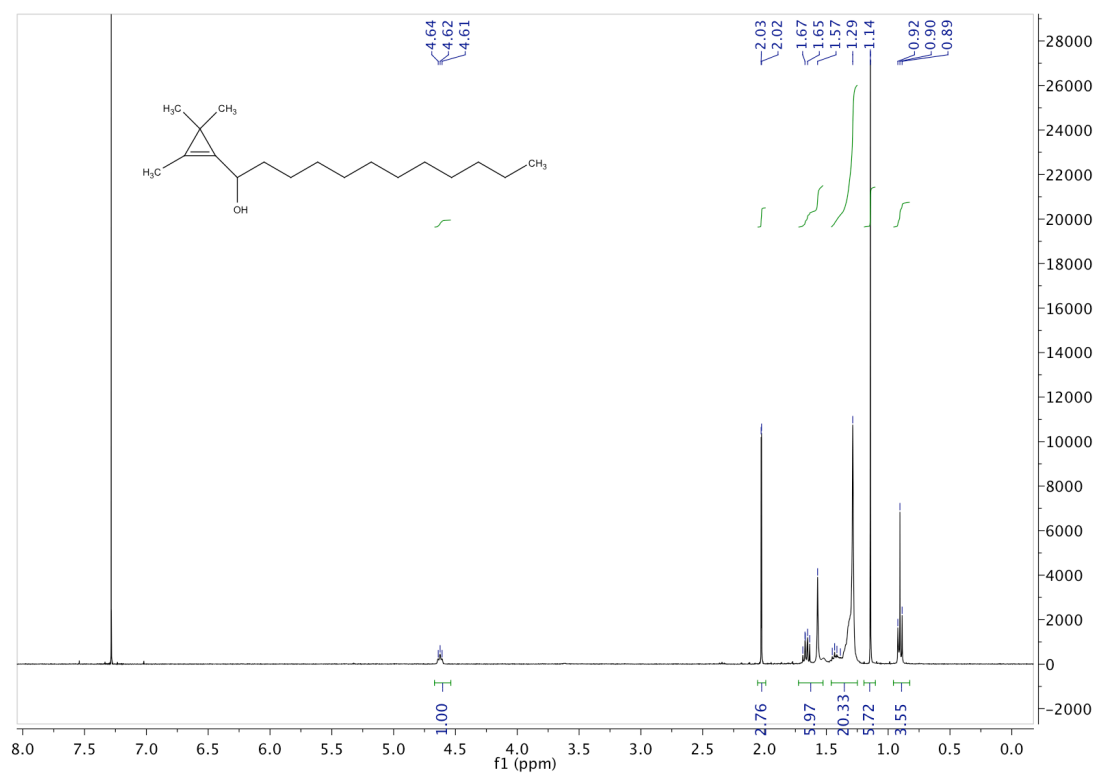

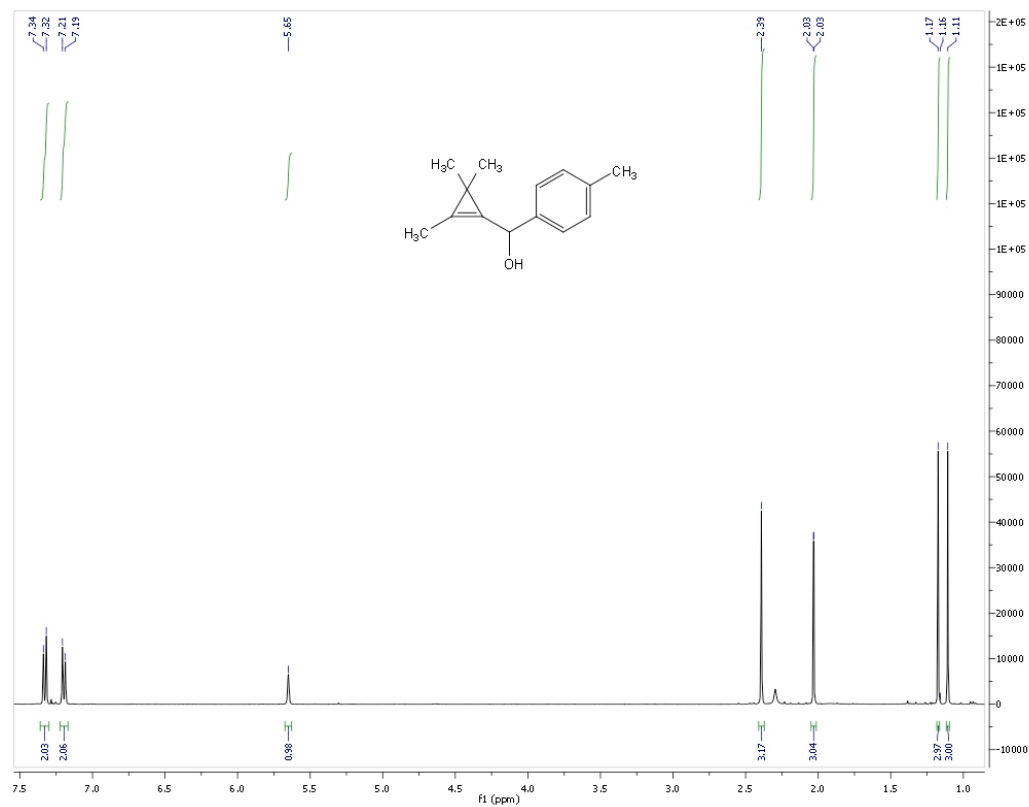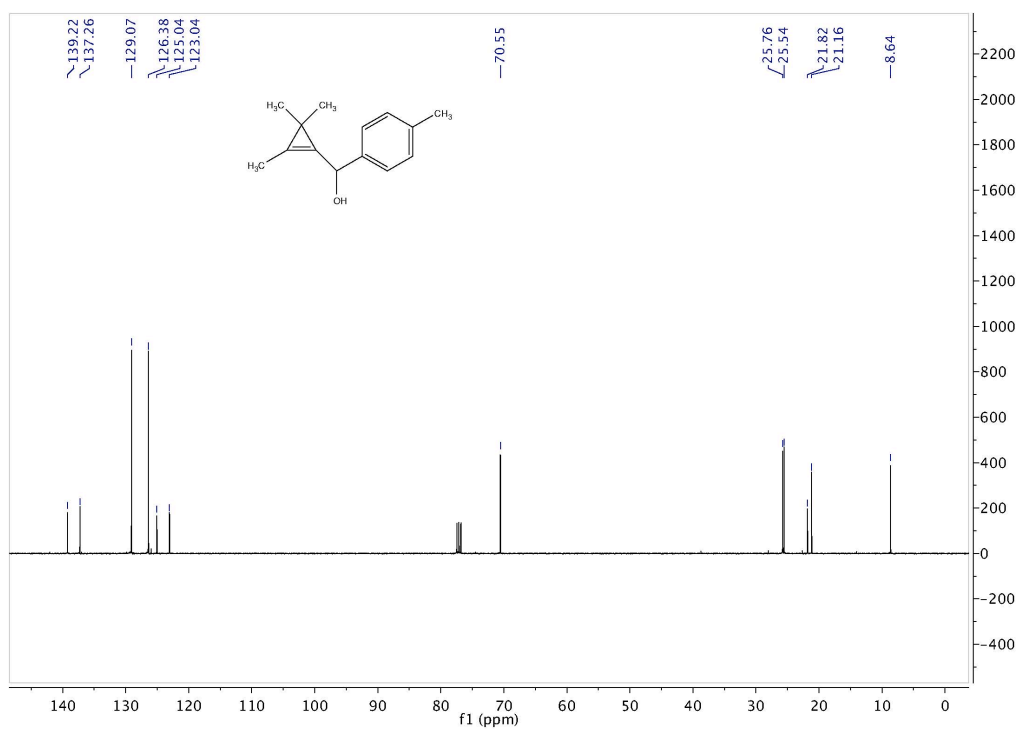

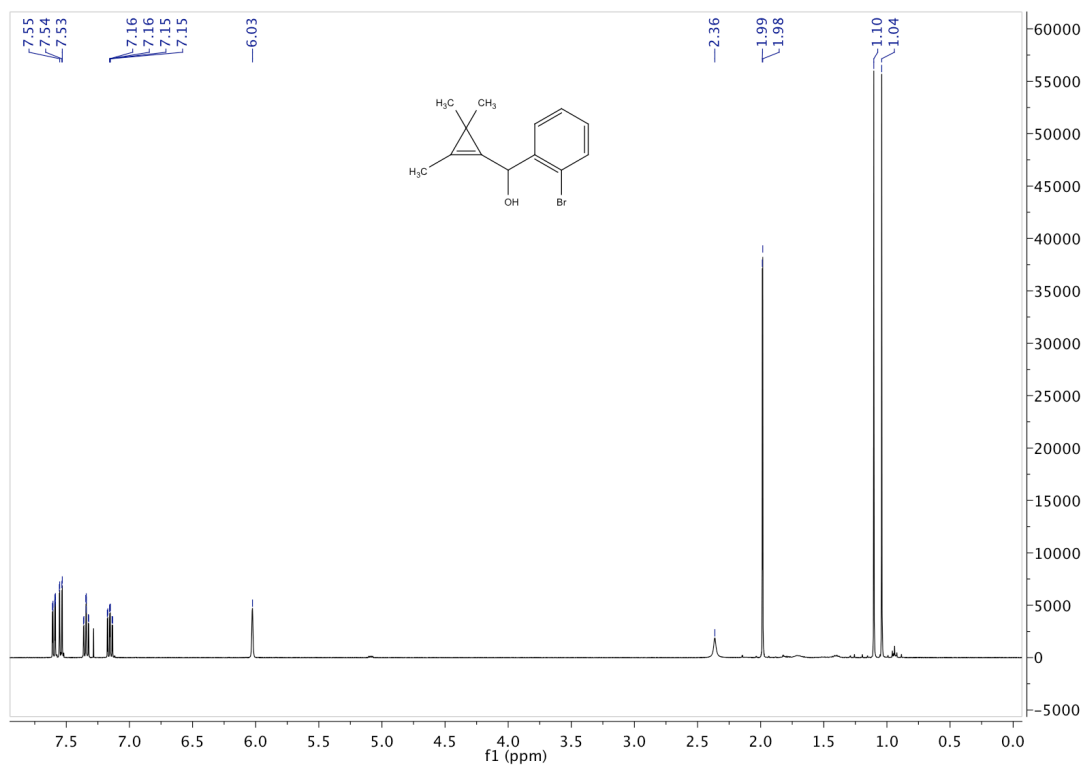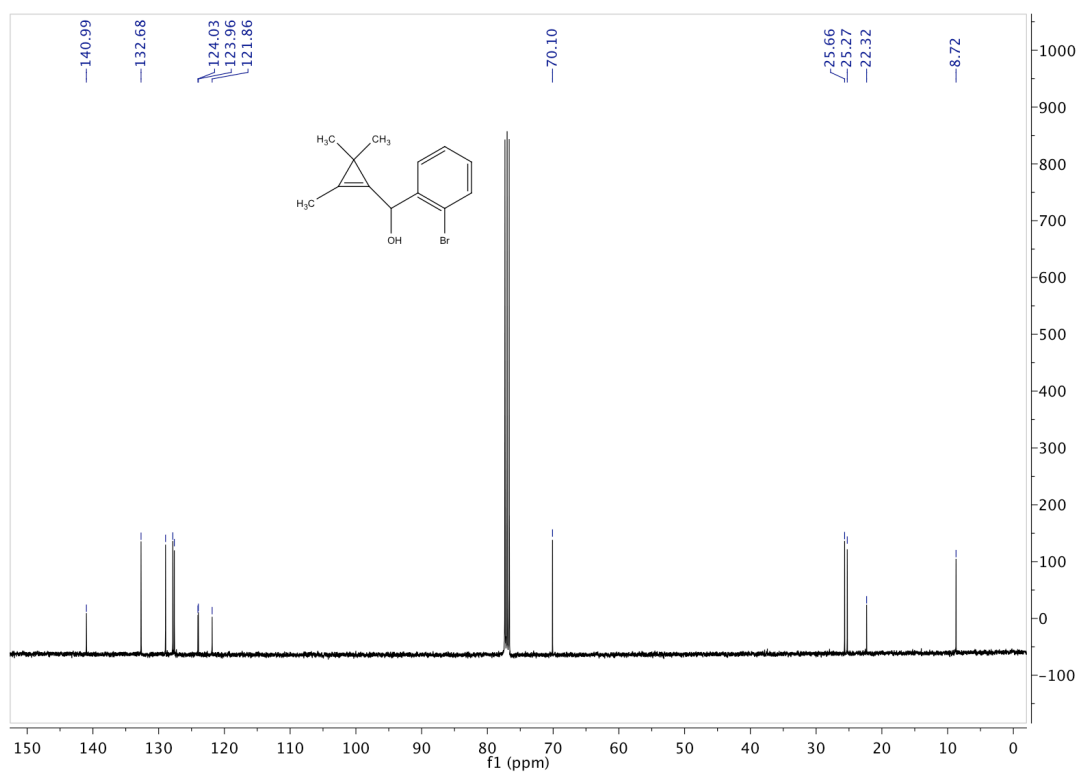

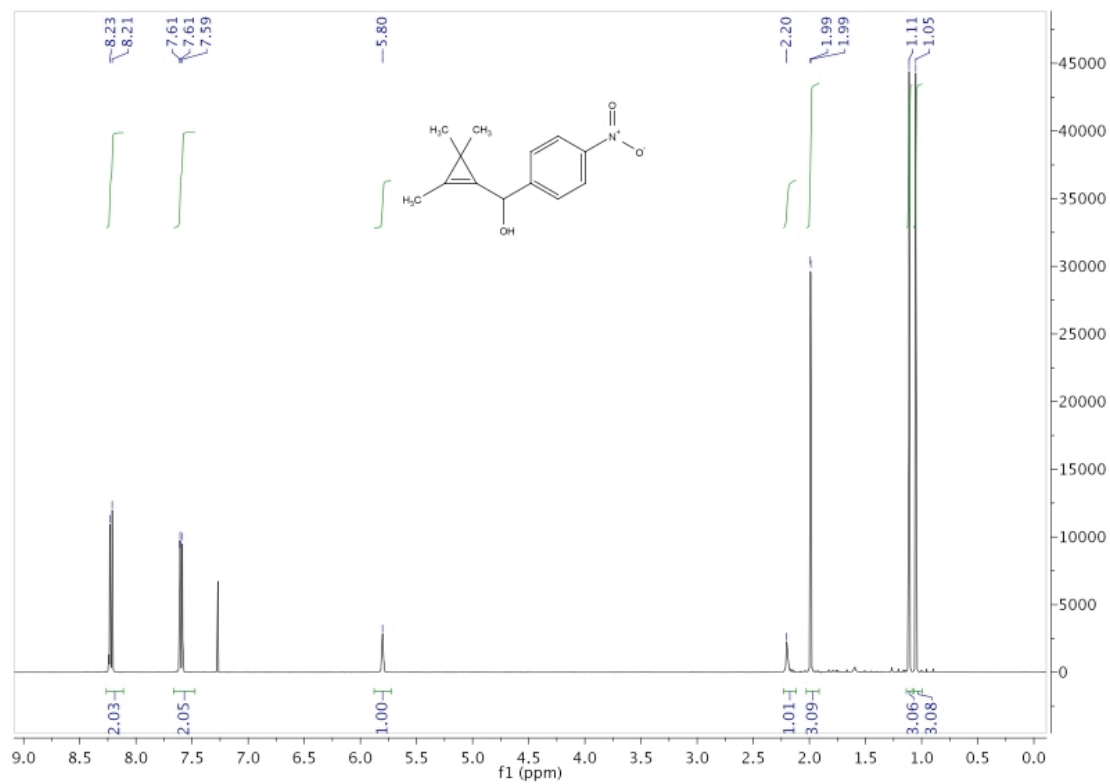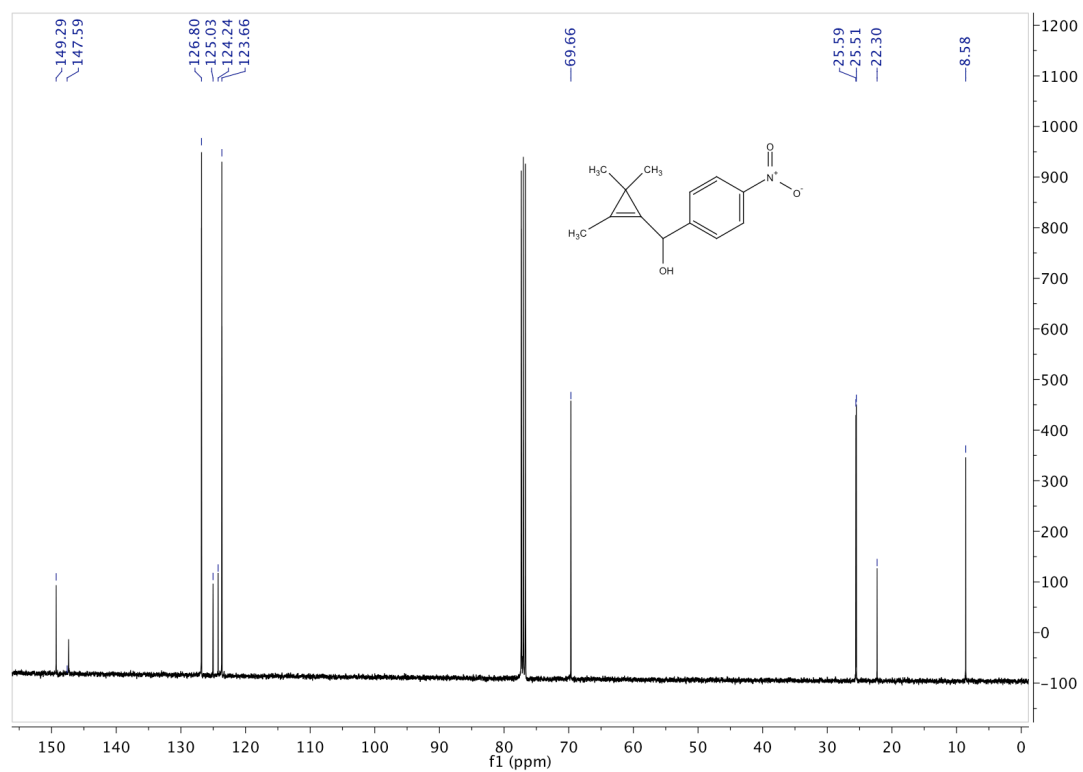

### General preparation of cyclopropenyl acetates:

The cyclopropenyl acetate (0.79 mmol) is dissolved in pyridine (1 ml) and cooled to 0°C with an ice-bath. Acetic anhydride (0.5 ml) is then added dropwise and the ice-bath removed. After the reaction is shown to be complete by TLC (typically 1 h), it is poured into ice-water (5 ml) and diethyl ether (15 ml) added. This mixture is stirred for 30 min, the organic layer separated and the aqueous extracted with diethyl ether (3 x 10 ml). The combined organics were washed with copper sulfate (15 ml of a sat. aq. soln.), sodium bicarbonate (15 ml of a sat. aq. soln.), dried (MgSO<sub>4</sub>). Evaporation to dryness in most cases gave analytically pure acetate.

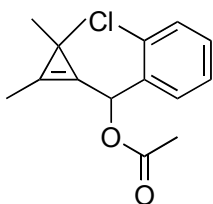

**(2-chlorophenyl)(2,3,3-trimethylcycloprop-1-enyl)methanol 1d** was obtained as a clear oil (28 mg, 96%). <sup>1</sup>H NMR (400 MHz, CDCl<sub>3</sub>) δ 7.50-7.42 (m, 1H), 7.39-7.37 (m, 1H), 7.29-7.25 (m, 2H), 7.01 (q, *J* = 1.5 Hz, 1H), 2.14 (s, 3H), 1.94 (d, *J* = 1.5 Hz, 3H), 1.07 (s, 3H), 1.02 (s, 3H). <sup>13</sup>C NMR (101 MHz, CDCl<sub>3</sub>) δ 169.7, 136.1, 132.5, 129.6, 129.2, 128.3, 126.9, 125.8, 121.6, 68.9, 25.5, 25.1, 22.7, 21.0, 8.73. IR 1740 cm<sup>-1</sup>. HRMS-ESI (*m/z*): (M + H)<sup>+</sup> calcd for C<sub>18</sub>H<sub>32</sub>O<sub>2</sub>, 265.0990; found, 265.0994.

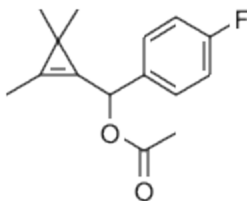

**(4-fluorophenyl)(2,3,3-trimethylcycloprop-1-enyl)methylacetate 1f** was obtained as a yellow oil (475 mg, 97%). <sup>1</sup>H NMR (400 MHz, CDCl<sub>3</sub>) δ 7.43 – 7.37 (m, 2H), 7.10 – 7.03 (m, 2H), 6.63 (d, *J* = 1.5 Hz, 1H), 2.11 (s, 3H), 1.96 (d, *J* = 1.5 Hz, 3H), 1.11 (s, 3H), 1.06 (s, 3H). <sup>13</sup>C NMR (101 MHz, CDCl<sub>3</sub>) δ 170.0, 162.6 (d, *J* = 196 Hz), 134.2, 129.3 (d, *J* = 32 Hz), 125.74, 122.36, 115.3 (d, *J* = 84 Hz), 71.29, 25.5, 25.2, 22.4, 21.1, 8.6. IR 2922, 1758, 1203 cm<sup>-1</sup>. HRMS-ESI (*m/z*): (M + H)<sup>+</sup> calcd for C<sub>15</sub>H<sub>18</sub>O<sub>2</sub>F, 249.1285, found 249.1287.

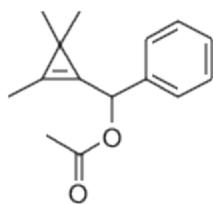

**phenyl(2,3,3-trimethylcycloprop-1-enyl)methyl acetate 1b** was obtained as a yellow oil (386 mg, 96%). <sup>1</sup>H NMR (400 MHz, CDCl<sub>3</sub>) δ 7.45-7.28 (m, 5H), 6.68 (s, 1H), 2.13 (s, 3H), 1.97 (d, *J* = 0.5 Hz, 3H), 1.13 (s, 3H), 1.08 (s, 3H). <sup>13</sup>C NMR (101 MHz, CDCl<sub>3</sub>) 170.1, 138.3, 128.4, 128.2, 127.4, 125.4, 122.6, 71.9, 25.4, 22.4, 21.1, 8.6. IR 1743, 1230 cm<sup>-1</sup>. HRMS-ESI (*m/z*): (M + H)<sup>+</sup> calcd for C<sub>15</sub>H<sub>19</sub>O<sub>2</sub>, 231.1380, found 231.1384.

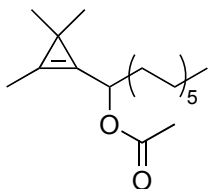

**1-(2,3,3-trimethylcycloprop-1-enyl)dodecyl acetate 1g** was obtained as a clear oil (280 mg, 99%).  $^1\text{H}$  NMR (400 MHz,  $\text{CDCl}_3$ )  $\delta$  5.62 (dt,  $J = 7.0, 1.5$  Hz, 1H), 2.06 (s, 3H), 1.97 (d,  $J = 1.5$  Hz, 3H), 1.7-1.69 (m, 2H), 1.38-1.27 (m, 18H), 1.09 (s, 3H), 1.08 (s, 3H), 0.89 (t,  $J = 7.0$  Hz, 3H).  $^{13}\text{C}$  NMR (101 MHz,  $\text{CDCl}_3$ )  $\delta$  170.4, 123.6, 122.6, 80.7, 33.4, 31.9, 29.6, 29.5, 29.5, 29.4, 29.3, 25.7, 25.6, 25.2, 22.7, 21.1, 21.7, 14.0, 8.6. IR 1744  $\text{cm}^{-1}$ . HRMS-ESI ( $m/z$ ): ( $M + H$ ) $^+$  calcd for  $\text{C}_{20}\text{H}_{36}\text{O}_2$  309.2788; found, 309.2791.

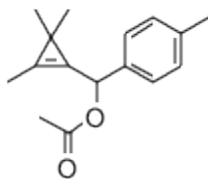

**p-tolyl(2,3,3-trimethylcycloprop-1-enyl)methyl acetate 1c** was obtained as a pale yellow oil (440 mg, 94%).  $^1\text{H}$  NMR (400 MHz,  $\text{CDCl}_3$ )  $\delta$  7.39 – 7.30 (m, 2H), 7.23 – 7.11 (m, 2H), 6.63 (d,  $J = 1.5$  Hz, 1H), 2.37 (d,  $J = 7.0$  Hz, 3H), 2.10 (s, 3H), 2.00 – 1.95 (m, 3H), 1.12 (s, 3H), 1.07 (s, 3H).  $^{13}\text{C}$  NMR (101 MHz,  $\text{CDCl}_3$ )  $\delta$  170.07, 138.00, 135.34, 129.12, 127.50, 125.20, 122.60, 76.83, 71.83, 25.60, 25.29, 22.30, 21.17, 21.14, 8.64. IR 1742, 1232  $\text{cm}^{-1}$ . HRMS-ESI ( $m/z$ ): ( $M + H$ ) $^+$  calcd for  $\text{C}_{16}\text{H}_{20}\text{O}_2$ , 245.1542, found 245.1536.

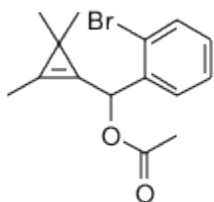

**(2-bromophenyl)(2,3,3-trimethylcycloprop-1-enyl)methyl acetate 1e** was obtained as a clear oil (208 mg, 85%).  $^1\text{H}$  NMR (400 MHz,  $\text{CDCl}_3$ )  $\delta$  7.57 (dd,  $J = 8.0, 1.5$  Hz, 1H), 7.51 (dd,  $J = 8.0, 1.5$  Hz, 1H), 7.36 – 7.28 (m, 1H), 7.21 – 7.14 (m, 1H), 6.95 (d,  $J = 1.5$  Hz, 1H), 2.14 (s, 3H), 1.94 (d,  $J = 1.5$ , 3H), 1.08 (s, 3H), 1.03 (s, 3H).  $^{13}\text{C}$  NMR (101 MHz,  $\text{CDCl}_3$ )  $\delta$  169.63, 137.80, 132.86, 129.43, 128.50, 127.52, 125.90, 122.42, 121.66, 71.34, 25.52, 25.14, 22.75, 21.02, 8.79. IR 2359, 1747, 1229  $\text{cm}^{-1}$ . HRMS-ESI ( $m/z$ ): ( $M + H$ ) $^+$  calcd for  $\text{C}_{15}\text{H}_{18}\text{O}_2\text{Br}$ , 309.0485, found, 309.0493.

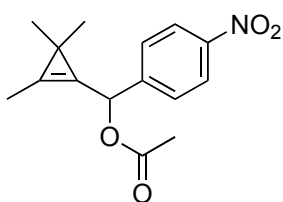

**(4-nitrophenyl)(2,3,3-trimethylcycloprop-1-enyl)methyl acetate 1a** was obtained as a pale brown oil (67 mg, 99%).  $^1\text{H}$  NMR (400 MHz,  $\text{CDCl}_3$ )  $\delta$  8.23 (d,  $J = 8.0$  Hz, 2H), 7.58 (d,  $J = 8.0$  Hz, 2H), 6.71 (s, 1H), 2.15 (s, 3H), 1.95 (s, 3H), 1.09 (s, 3H), 1.05 (s, 3H).  $^{13}\text{C}$  NMR (101 MHz,  $\text{CDCl}_3$ )  $\delta$  169.8, 147.7, 145.6, 127.8, 127.0, 123.7, 121.7, 70.7, 25.4, 25.2, 22.7, 21.0, 8.6. IR 1744, 1524, 1348, 1228  $\text{cm}^{-1}$ . HRMS-ESI ( $m/z$ ): ( $M + H$ ) $^+$  calcd for  $\text{C}_{15}\text{H}_{17}\text{NO}_4$ , 276.1236; found, 276.1230.

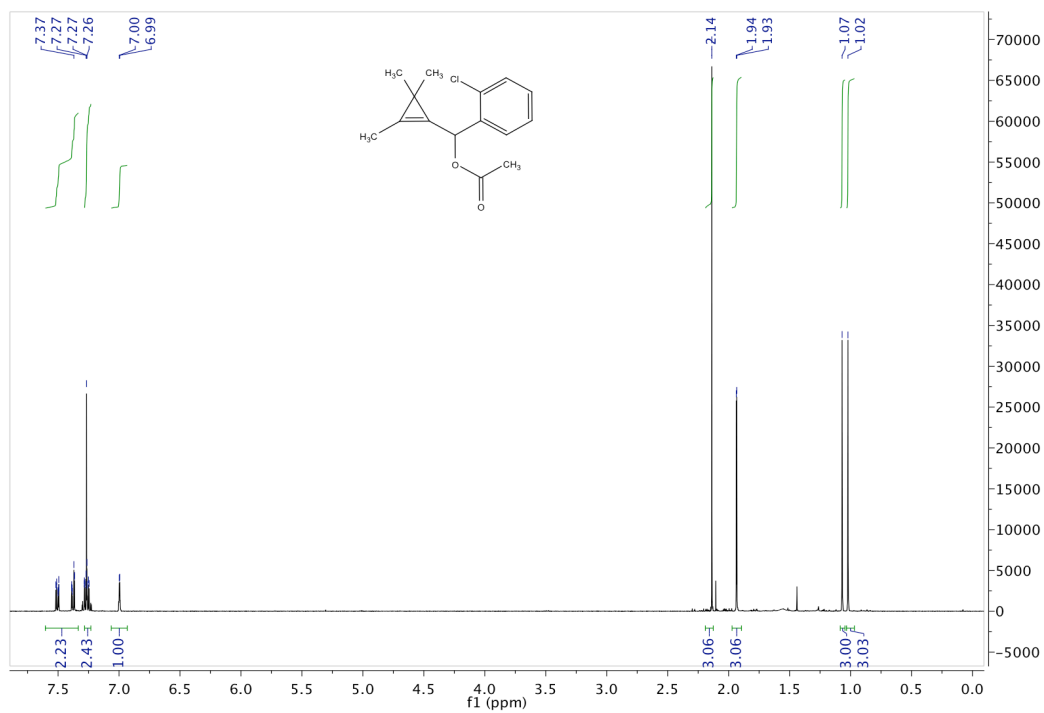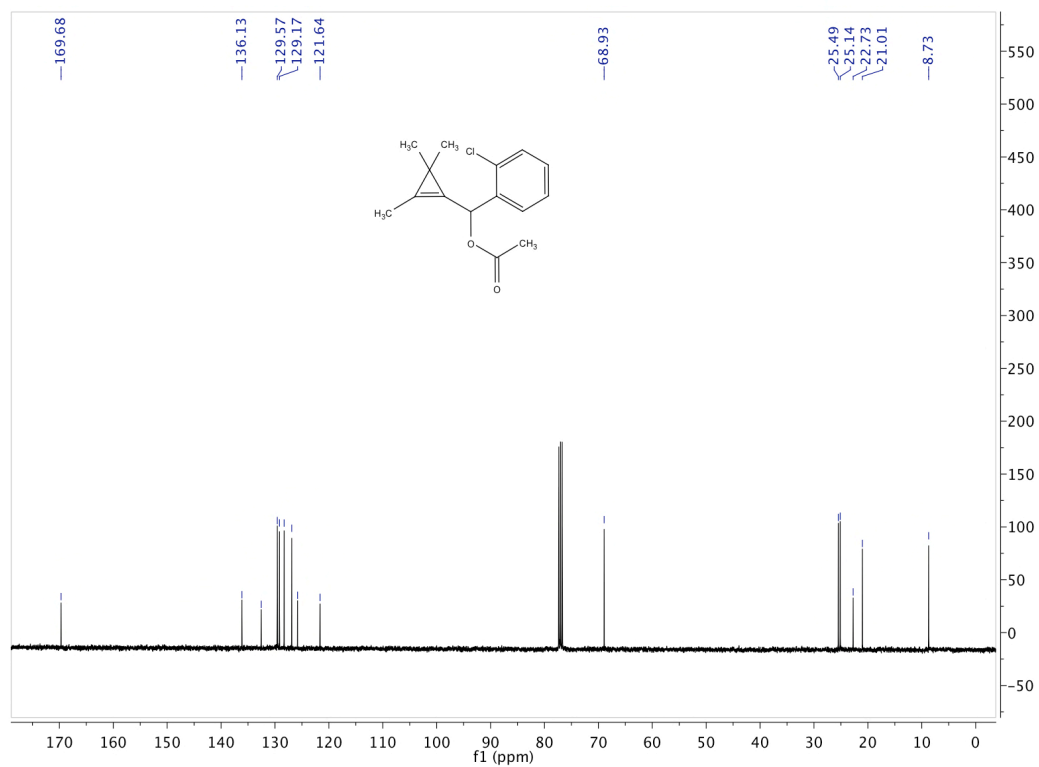

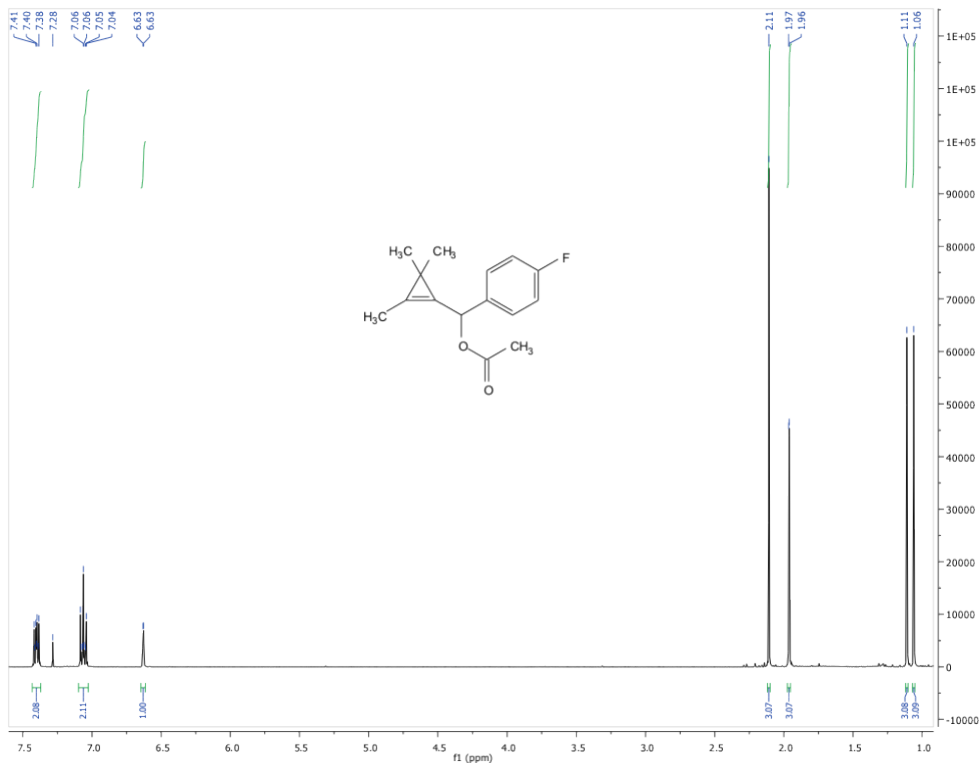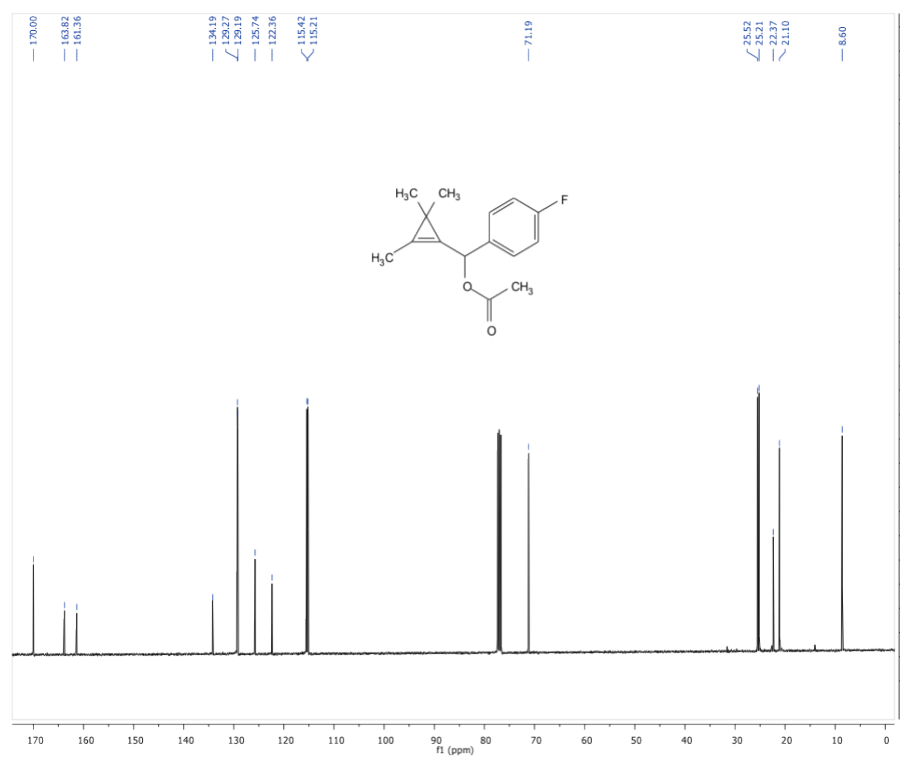



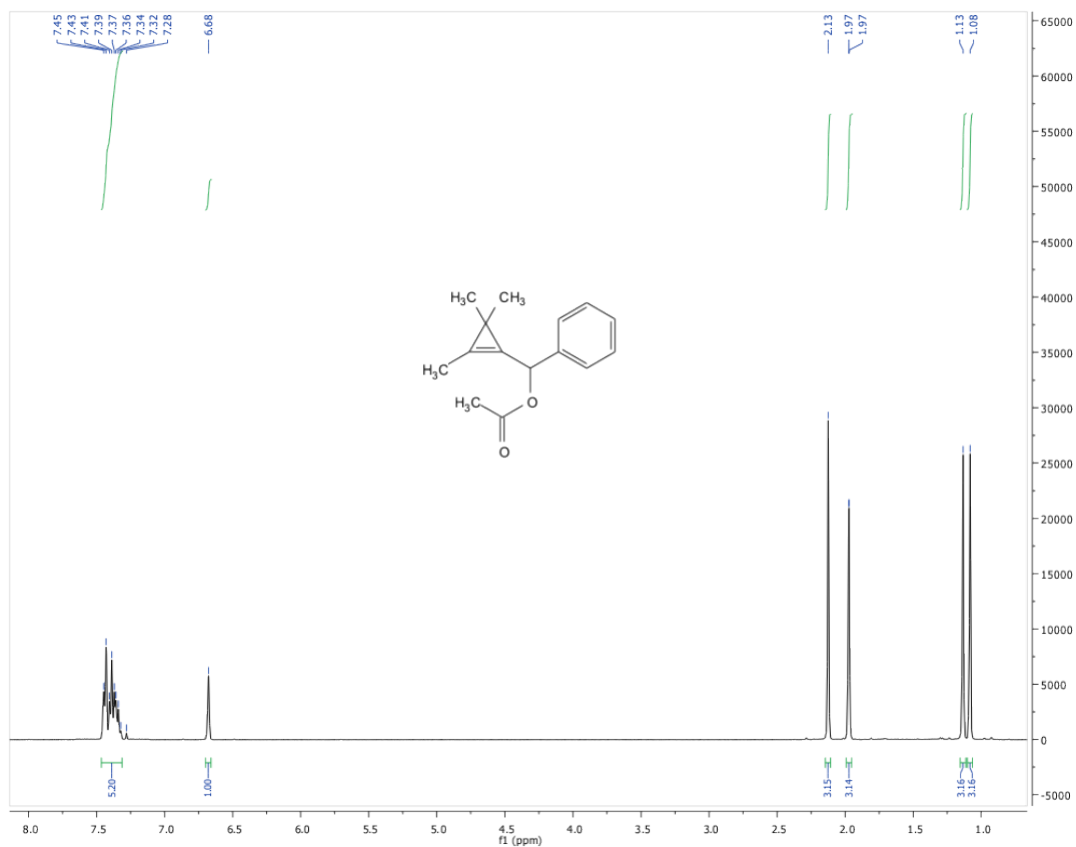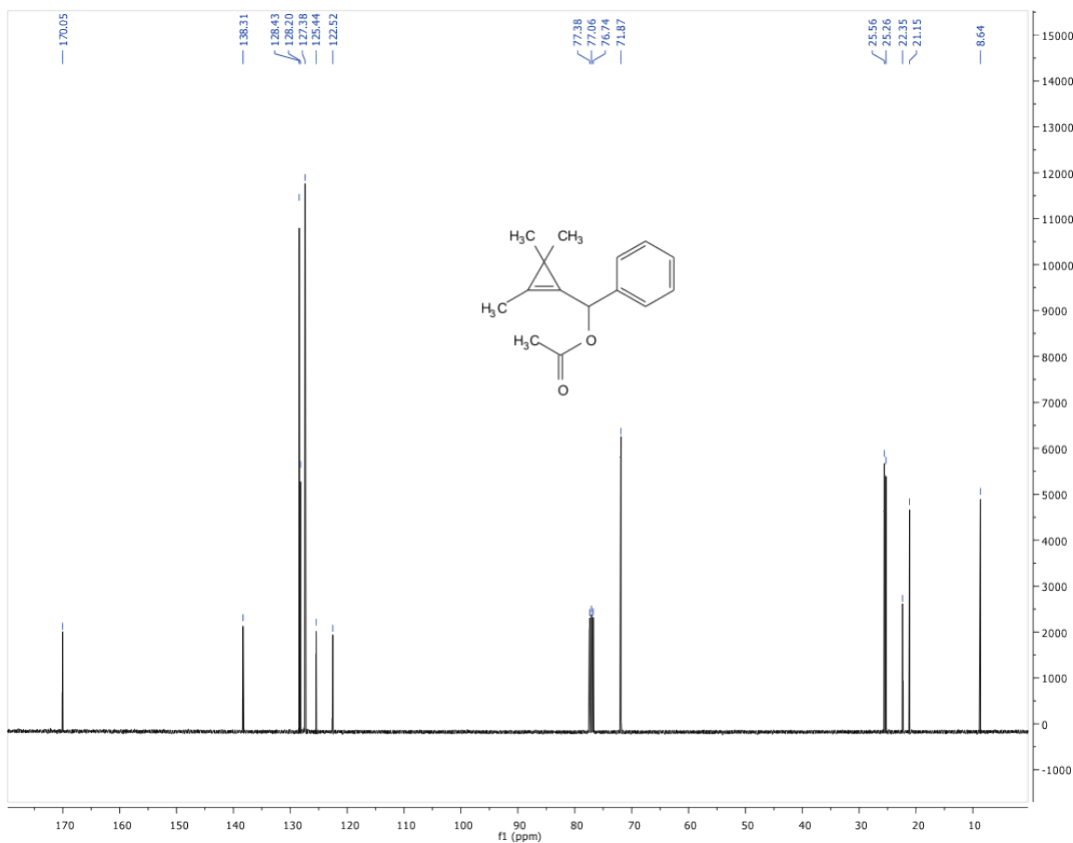

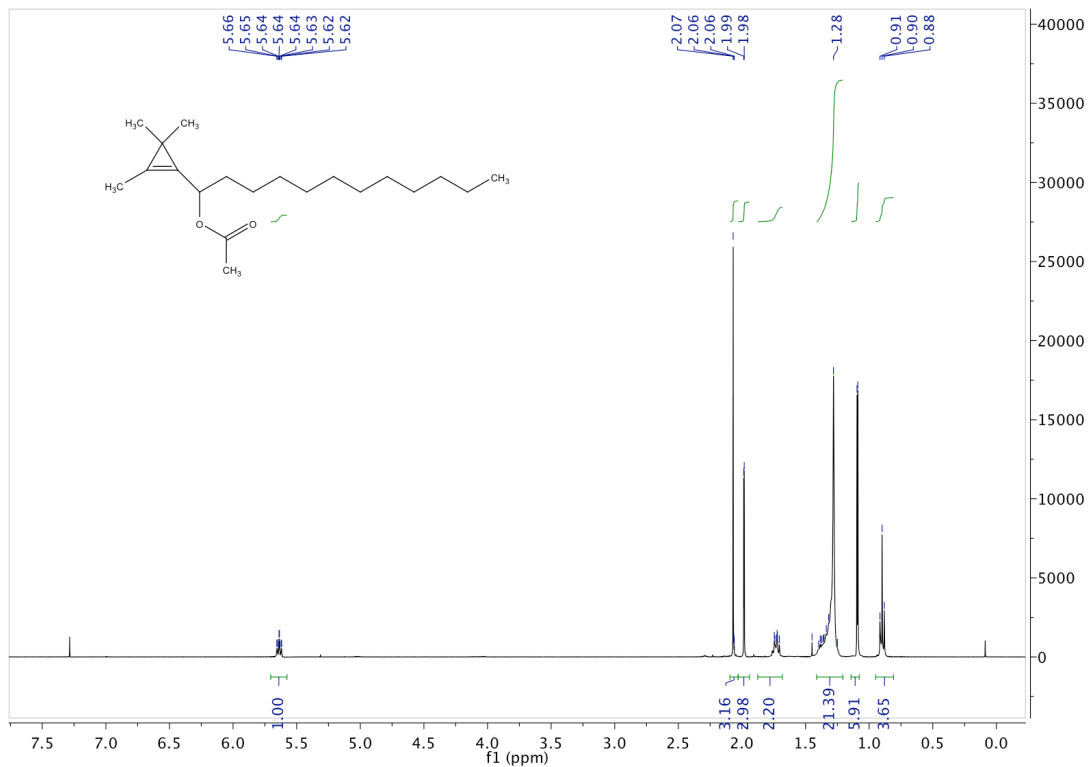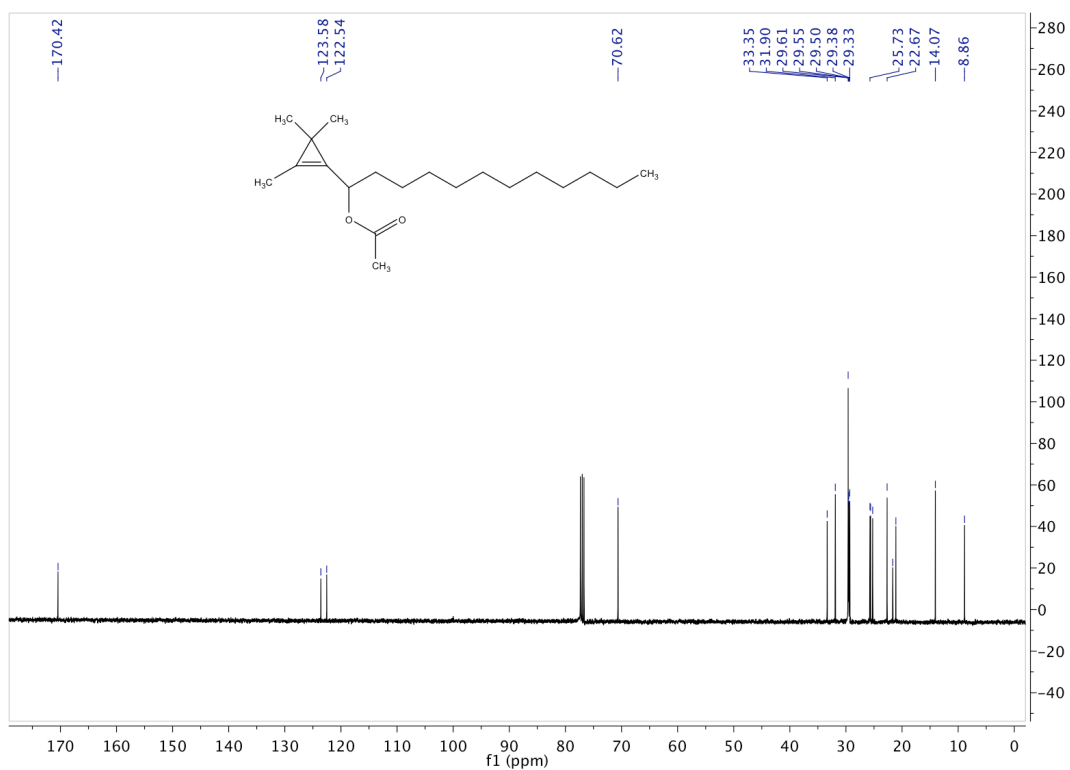

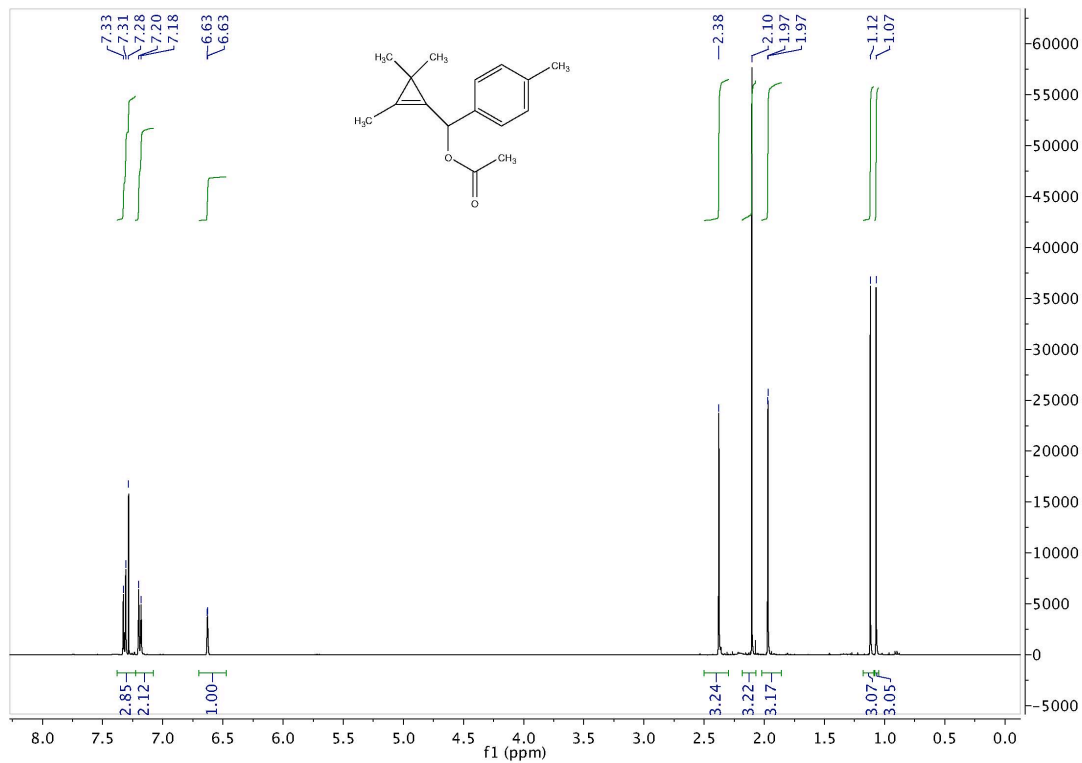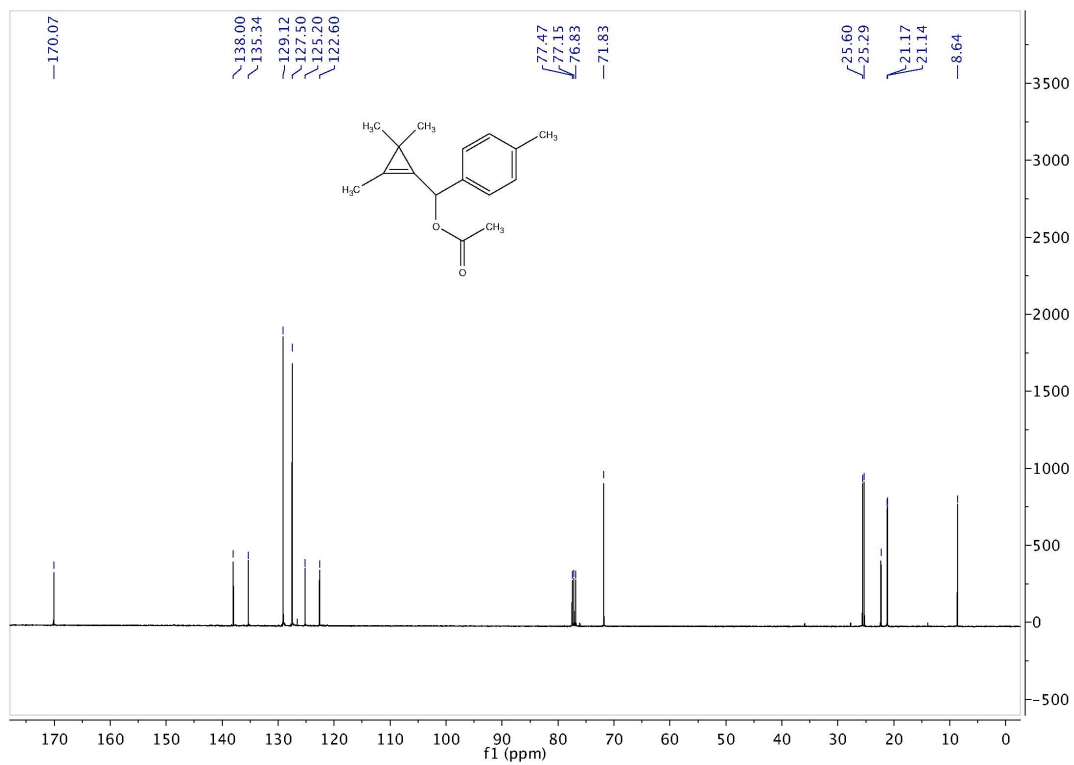

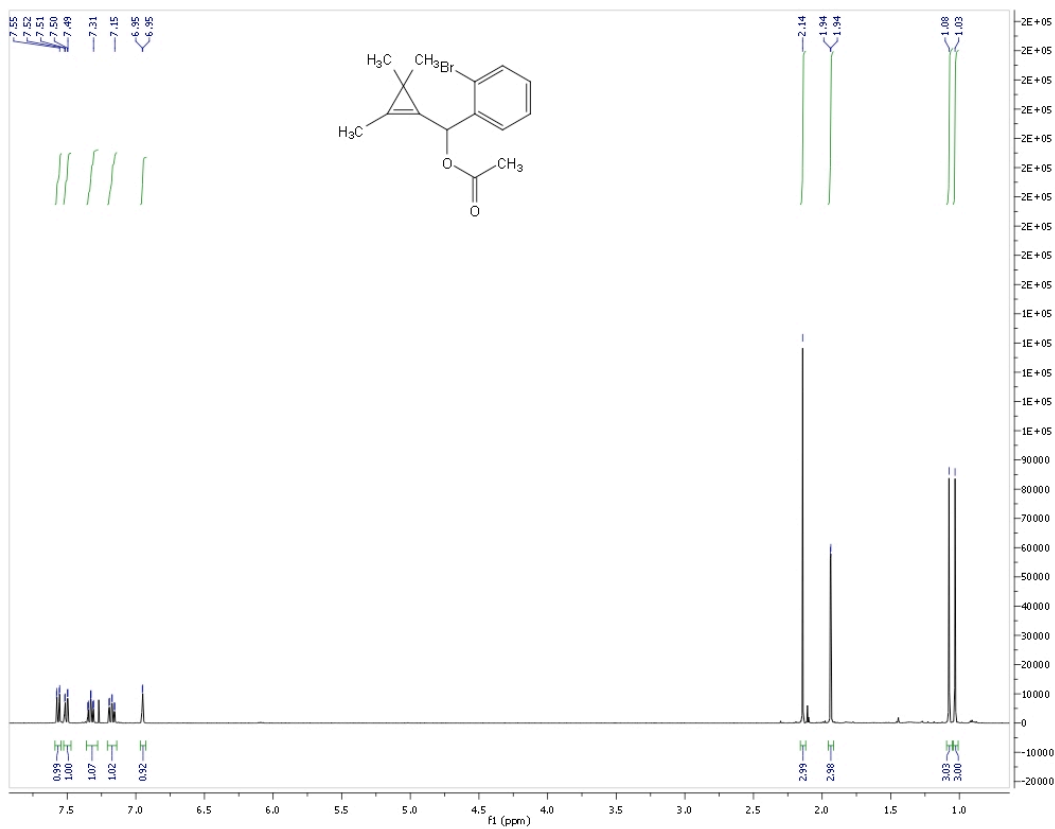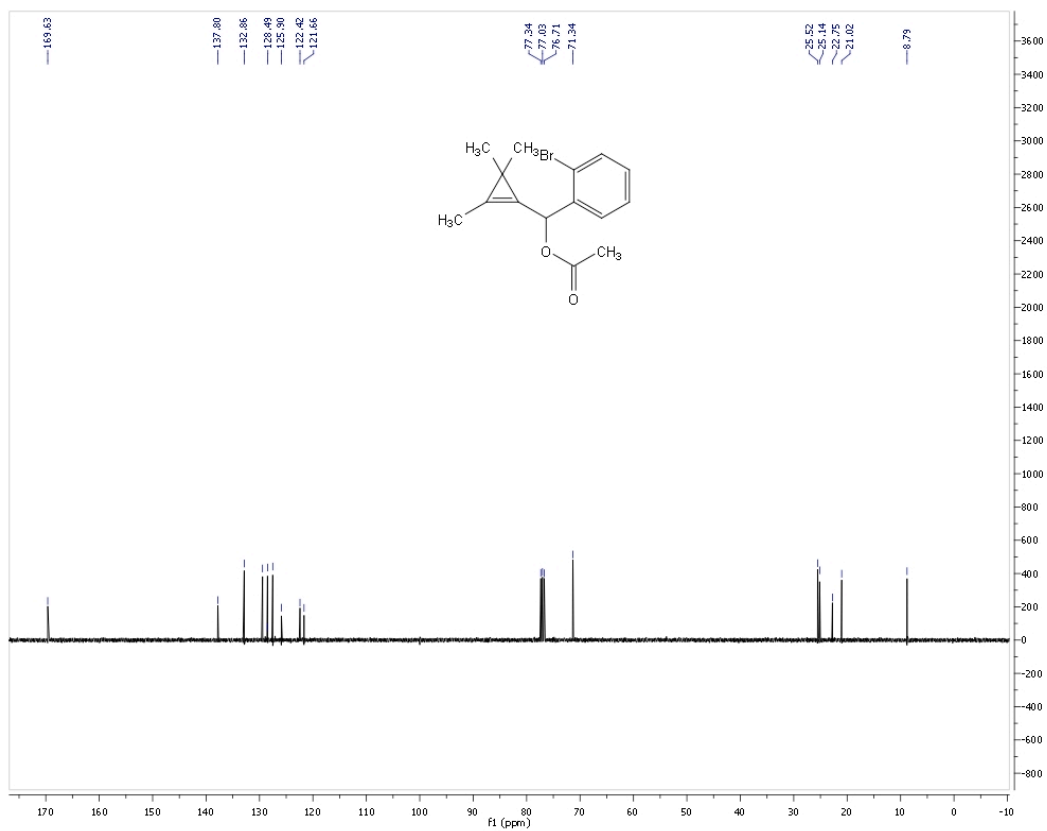

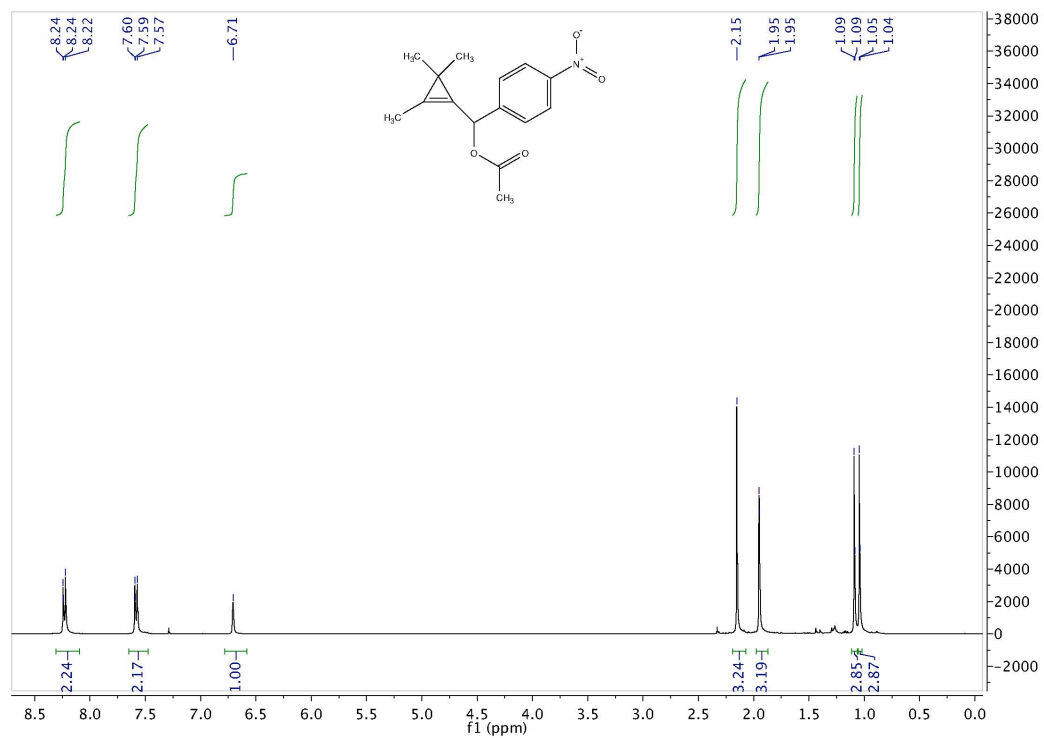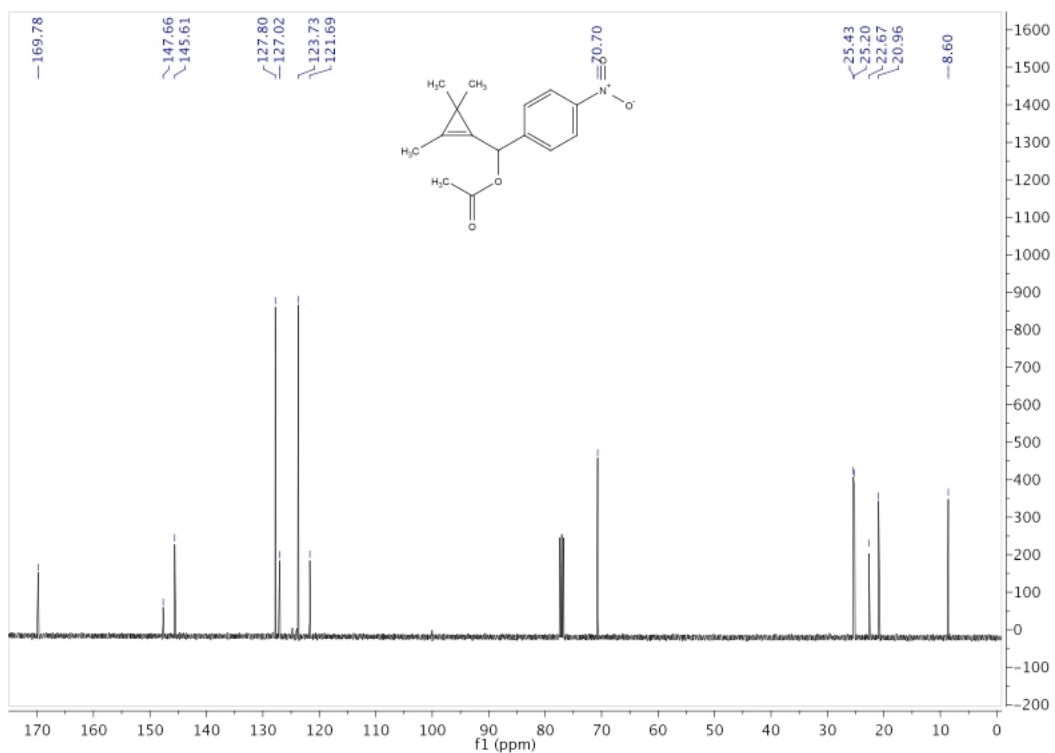

### General preparation of halo-dienes:

The cyclopropenyl acetate (0.17 mmol, 1.0 equiv) was weighed into a flame-dried flask purged with argon and  $\text{CH}_2\text{Cl}_2$  (3.4 ml) added. The solution was then cooled to  $-78^\circ\text{C}$  with a dry-ice acetone bath and  $\text{TiCl}_4$  or  $\text{TiBr}_4$  (0.17 ml of a 1.0 M solution in  $\text{CH}_2\text{Cl}_2$ ) added dropwise. After 5 mins the reaction was quenched by the addition of  $\text{MeOH}:\text{H}_2\text{O}$  (5 ml of a 1:1 mixture) and allowed to warm to room temperature. The organic layer was separated and the aqueous extracted with  $\text{CH}_2\text{Cl}_2$  (2 x 5 ml). The combined organics were dried ( $\text{MgSO}_4$ ) and evaporated to dryness. Purification on  $\text{SiO}_2$  (typically pentane or hexane on a Chromatotron<sup>®</sup>) yielded the pure diene.

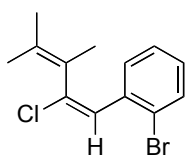

**(E)-1-bromo-2-(2-chloro-3,4-dimethylpenta-1,3-dienyl)benzene 5e** was obtained as a colorless oil (43 mg, 89%).  $^1\text{H}$  NMR (400 MHz,  $\text{CDCl}_3$ )  $\delta$  7.55 (dd,  $J = 8.0, 1.0$  Hz, 1H), 7.23 – 7.13 (m, 2H), 7.10 – 7.03 (m, 1H), 6.83 (s, 1H), 1.92 – 1.87 (m, 3H), 1.64 – 1.60 (m, 3H), 1.49 (d,  $J = 1.0$  Hz, 3H).  $^{13}\text{C}$  NMR (100 MHz,  $\text{CDCl}_3$ )  $\delta$  138.27, 135.93, 133.70, 132.61, 128.96, 128.63, 127.51, 126.95, 124.92, 123.45, 21.65, 20.08, 17.06. IR 1622, 1464, 1436, 1373, 1130, 1025, 802, 747  $\text{cm}^{-1}$ . MS (EI) Calculated for  $[\text{C}_{13}\text{H}_{14}\text{BrCl}]^+$ : 285.6; Found: 285.6.

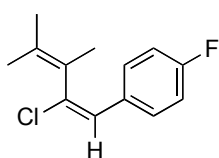

**(E)-1-(2-chloro-3,4-dimethylpenta-1,3-dienyl)-4-fluorobenzene 5f** was obtained as a clear colorless oil (37.4 mg, 72%).  $^1\text{H}$  NMR (400 MHz,  $\text{CDCl}_3$ )  $\delta$  7.27 – 7.17 (m, 2H), 7.04 – 6.89 (m, 2H), 6.59 (s, 1H), 1.95 – 1.86 (m, 3H), 1.74 (s, 3H), 1.64 – 1.59 (m, 3H).  $^{13}\text{C}$  NMR (100 MHz,  $\text{CDCl}_3$ )  $\delta$  161.8 (d,  $J = 247$  Hz), 136.14, 133.15, 131.73, 129.11, 126.50, 125.91, 115.4 (d,  $J = 21$  Hz), 21.53, 19.95, 16.48. IR 1625, 1602, 1508, 1233, 1146, 829  $\text{cm}^{-1}$ . HRMS-EI ( $m/z$ ): ( $\text{M}$ )<sup>+</sup> calcd for  $\text{C}_{13}\text{H}_{14}\text{ClF}$ , 224.0768; found 224.077

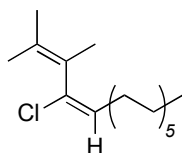

**4-chloro-2,3-dimethylhexadeca-2,4-diene 5l** was obtained as a clear oil (2.3:1 *E:Z* ratio 68 mg, 98%).  $^1\text{H}$  NMR (400 MHz,  $\text{CDCl}_3$ )  $\delta$  5.61 (1H, t,  $J = 7.5$  Hz *major*), 5.40 (1H, t,  $J = 7.0$  Hz), 2.24 (2H, q,  $J = 6.5$  Hz *minor*), 1.90 (2H, q,  $J = 7.0$  Hz *major*), 1.81-1.77 (6H, m *major*), 1.75-1.74 (6H, m *minor*), 1.73-1.72 (3H, m *minor*), 1.72 (3H, q,  $J = 1.5$  Hz *major*) 1.35-1.28 (18H, m *major and minor*), 0.91 (t,  $J = 7.0$  Hz *major and minor*).  $^{13}\text{C}$  NMR (101 MHz,

$\text{CDCl}_3$ )  $\delta$  134.2, 133.0, 131.8, 130.9, 128.7, 128.3, 127.6, 125.5, 31.9, 31.9, 29.7, 29.6, 29.6, 29.6, 29.6, 29.5, 29.4, 29.3, 29.3, 29.3, 29.3, 29.2, 29.0, 28.6, 22.7, 21.9, 21.7, 20.2, 19.7, 17.5, 17.0, 14.1. IR 2929.2, 2854, 1465, 1373, 1132  $\text{cm}^{-1}$ . HRMS-EI ( $m/z$ ):  $M^+$  calcd for  $\text{C}_{18}\text{H}_{13}\text{Cl}$ , 284.2271; found 284.2260.

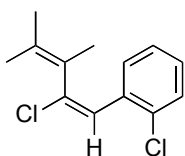

**(E)-1-chloro-2-(2-chloro-3,4-dimethylpenta-1,3-dienyl)benzene 5d** was obtained as a clear yellow oil (72 mg, 84%).  $^1\text{H}$  NMR (400 MHz,  $\text{CDCl}_3$ )  $\delta$  7.38-7.35 (m, 1H), 7.26-7.24 (m, 1H), 7.25-7.11 (m, 2H), 6.90 (s, 1H), 1.91-1.90 (m, 3H), 1.65 (d,  $J = 8.0, 1.0$  Hz, 3H), 1.52-1.51 (m, 3H).  $^{13}\text{C}$  NMR (100 MHz,  $\text{CDCl}_3$ )  $\delta$  138.4, 134.1, 133.6, 133.1, 128.7, 128.4, 126.4, 125.1, 125.0, 115.5, 21.6, 20.0, 17.0. IR 1650, 1623, 1468, 1440, 1374, 1148, 1129, 1052, 1035, 946, 929, 806, 749  $\text{cm}^{-1}$ . HRMS-CI ( $m/z$ ): ( $M + \text{H}$ ) $^+$  calcd for  $\text{C}_{13}\text{H}_{14}\text{Cl}_2$ , 240.0473; found 240.0466.

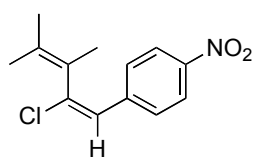

**(Z)-1-(2-chloro-3,4-dimethylpenta-1,3-dienyl)-4-nitrobenzene 5a** was obtained as a pale yellow solid (120 mg, 71%). Mp: 111.0-112.1  $^\circ\text{C}$ .  $^1\text{H}$  NMR (400 MHz,  $\text{CDCl}_3$ )  $\delta$  8.13 (d,  $J = 8.0$  Hz, 2H), 7.38 (d,  $J = 8.0$  Hz, 2H), 6.68 (s, 1H), 1.91, (s, 3H), 1.74 (s, 3H), 1.58 (s, 3H).  $^{13}\text{C}$  NMR (101 MHz,  $\text{CDCl}_3$ )  $\delta$  146.4, 142.0, 141.2, 134.0, 128.1, 126.0, 125.6, 123.8, 21.6, 20.1, 16.5. IR 1595, 1519, 1345  $\text{cm}^{-1}$ . MS (EI) Calculated for  $[\text{C}_{13}\text{H}_{14}\text{ClNO}_2]^+$ : 251.7; Found: 251.9.

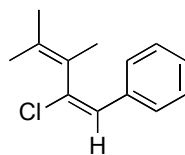

**(Z)-(2-chloro-3,4-dimethylpenta-1,3-dienyl)benzene 5b** was obtained as a clear oil (51 mg, 84%).  $^1\text{H}$  NMR (400 MHz,  $\text{CDCl}_3$ )  $\delta$  7.31-7.20 (m, 5H), 6.65 (s, 1H), 1.93-1.92 (m, 3H), 1.75 (s, 3H), 1.63 (q,  $J = 1.5$  Hz, 3H).  $^{13}\text{C}$  NMR (100 MHz,  $\text{CDCl}_3$ )  $\delta$  136.4, 135.6, 132.9, 128.4, 127.7, 127.6, 127.2, 126.2, 21.6, 20.0, 16.5. IR 1598, 1490, 1444, 1132, 697  $\text{cm}^{-1}$ . MS (EI) Calculated for  $[\text{C}_{13}\text{H}_{15}\text{Cl}]^+$ : 205.8; Found: 206.0.

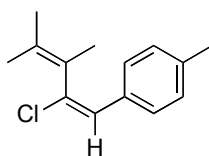

**(Z)-1-(2-chloro-3,4-dimethylpenta-1,3-dienyl)-4-methylbenzene 5c** was obtained as a clear oil (23 mg, 36%).  $^1\text{H}$  NMR (400 MHz,  $\text{CDCl}_3$ )  $\delta$  7.15 (s,  $J = 8.0$  Hz, 2H), 7.09 (d,  $J = 8.0$  Hz, 2H), 6.59 (s, 1H), 2.33 (s, 3H), 1.91-1.89 (m, 3H), 1.74 (s, 3H), 1.63 (q,  $J = 1.5$  Hz, 3H).  $^{13}\text{C}$  NMR (101 MHz,  $\text{CDCl}_3$ )  $\delta$  137.1, 135.4, 132.8, 132.7, 129.1, 127.5, 127.4, 126.3, 21.6, 21.2, 20.0, 16.5.

IR 1624, 1511, 1443, 1373, 1145, 952, 879, 809, 749  $\text{cm}^{-1}$ . HRMS-Cl ( $m/z$ ):  
( $M + \text{NH}_4$ )<sup>+</sup> calcd for  $\text{C}_{14}\text{H}_{21}\text{NCl}$ , 238.1362; found 238.1368.

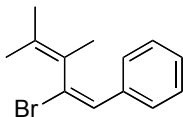

**(E)-1-(2-bromo-3,4-dimethylpenta-1,3-dienyl)benzene 5h** was obtained as a clear oil (26 mg, 70%).  $^1\text{H}$  NMR (400 MHz,  $\text{CDCl}_3$ )  $\delta$  7.31-7.20 (m, 5H), 6.85 (s, 1H), 1.93 (s, 3H), 1.74 (s, 3H), 1.63 (s, 3H).  $^{13}\text{C}$  NMR (101 MHz,  $\text{CDCl}_3$ )  $\delta$  136.26, 132.64, 131.41, 128.44, 128.41, 127.94, 127.47, 127.36, 21.60, 20.08, 16.65. IR 1596, 1494, 1446, 1130,  $693\text{cm}^{-1}$ . HRMS-TOF FD ( $m/z$ ): ( $M + \text{H}$ )<sup>+</sup> calcd for  $\text{C}_{13}\text{H}_{15}\text{Br}$ , 250.0357; found, 250.0352.

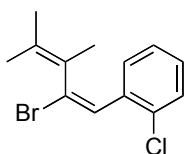

**(E)-1-(2-bromo-3,4-dimethylpenta-1,3-dienyl)-2-chlorobenzene 5i** was obtained as a clear oil (34.0 mg, 79%).  $^1\text{H}$  NMR (400 MHz,  $\text{CDCl}_3$ )  $\delta$  7.36 (m, 1H), 7.25 (dd,  $J=4.0, 3.5$  Hz, 1H), 7.15 (m, 3H), 1.91 (m, 3H), 1.65 (m, 3H), 1.53 (m, 3H).  $^{13}\text{C}$  NMR (101 MHz,  $\text{CDCl}_3$ )  $\delta$  134.7, 133.2, 132.9, 130.3, 129.4, 128.6, 128.5, 126.8, 126.4, 21.6, 20.2, 17.3. IR 1615, 1490, 1421, 1141,  $748\text{cm}^{-1}$ . HRMS-TOF FD ( $m/z$ ): ( $M + \text{H}$ )<sup>+</sup> calcd for  $\text{C}_{13}\text{H}_{14}\text{BrCl}$ , 283.9967; found, 283.9962.

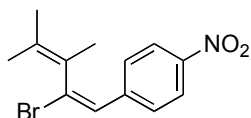

**(E)-1-(2-bromo-3,4-dimethylpenta-1,3-dienyl)-4-nitrobenzene 5g** was obtained as a yellow solid (19.2 mg, 68%).  $^1\text{H}$  NMR (400 MHz,  $\text{CDCl}_3$ )  $\delta$  8.15 (m, 2H), 7.40 (m, 2H), 6.93 (s, 1H), 1.93 (m, 3H), 1.76 (dd,  $J=0.9, 0.4$  Hz, 3H), 1.61 (m, 3H).  $^{13}\text{C}$  NMR (101 MHz,  $\text{CDCl}_3$ )  $\delta$  142.5, 133.6, 133.3, 129.7, 128.0, 127.4, 123.9, 21.62, 20.18, 16.70. IR 1565, 1497, 1421, 1145,  $733\text{cm}^{-1}$ . HRMS-TOF FD ( $m/z$ ): ( $M + \text{H}$ )<sup>+</sup> calcd for  $\text{C}_{13}\text{H}_{14}\text{BrNO}_2$ , 295.0208; found, 295.0202.

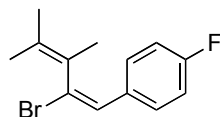

**(E)-1-(2-bromo-3,4-dimethylpenta-1,3-dienyl)-4-fluorobenzene 5k** was obtained as a clear yellow oil (41.8 mg, 68%).  $^1\text{H}$  NMR (400 MHz,  $\text{CDCl}_3$ )  $\delta$  7.22 (m, 2H), 6.97 (dd,  $J=9.6, 7.8$  Hz, 2H), 6.81 (s, 1H), 1.90 (s, 3H), 1.74 (s, 3H), 1.62 (s, 3H).  $^{13}\text{C}$  NMR (101 MHz,  $\text{CDCl}_3$ )  $\delta$  161.9 (d,  $J=248.5$  Hz), 132.85, 132.43, 130.18, 129.1, 128.0, 127.6, 115.4 (d,  $J=22$  Hz), 21.57, 20.08, 16.61. IR 1604, 1508, 1457, 1126,  $688\text{cm}^{-1}$ . HRMS-TOF FD ( $m/z$ ): ( $M + \text{H}$ )<sup>+</sup> calcd for  $\text{C}_{13}\text{H}_{14}\text{BrF}$ , 268.0263; found, 268.0257.

**(E)-1-bromo-2-(2-bromo-3,4-dimethylpenta-1,3-dienyl)benzene 5j** was obtained as a clear yellow oil (42.0 mg, 70%).  $^1\text{H}$  NMR (400 MHz,  $\text{CDCl}_3$ )  $\delta$  7.56 (dd,  $J=7.9, 1.2$  Hz, 1H), 7.20 (m, 2H), 7.09 (m, 2H), 1.91 (m, 3H), 1.63



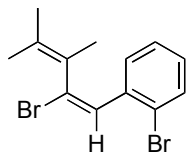

(s, 3H), 1.52 (d,  $J = 1.4$  Hz, 3H).  $^{13}\text{C}$  NMR (101 MHz,  $\text{CDCl}_3$ )  $\delta$  136.5, 133.3, 132.7, 131.2, 130.3, 128.7, 128.7, 127.0, 126.6, 123.2, 21.7, 20.2, 17.4. IR 1605, 1496, 1437, 1122, 688  $\text{cm}^{-1}$ . HRMS-TOF FD ( $m/z$ ): ( $\text{M} + \text{H}$ ) $^+$  calcd for  $\text{C}_{13}\text{H}_{14}\text{Br}_2$ , 327.9462; found, 327.9457.

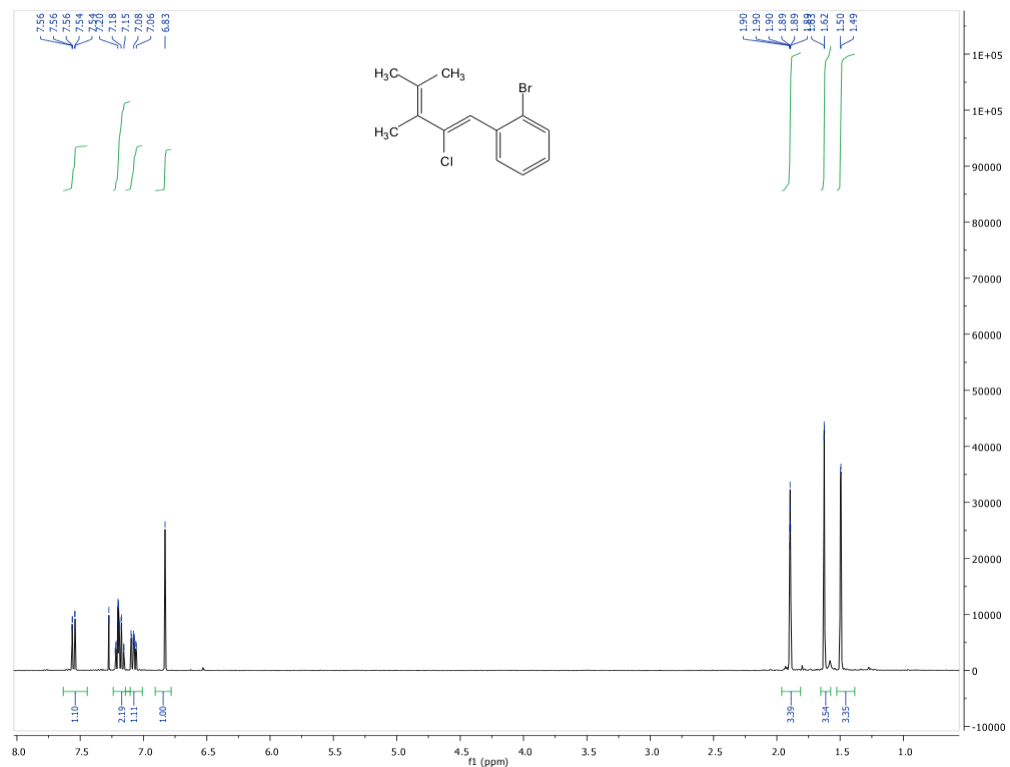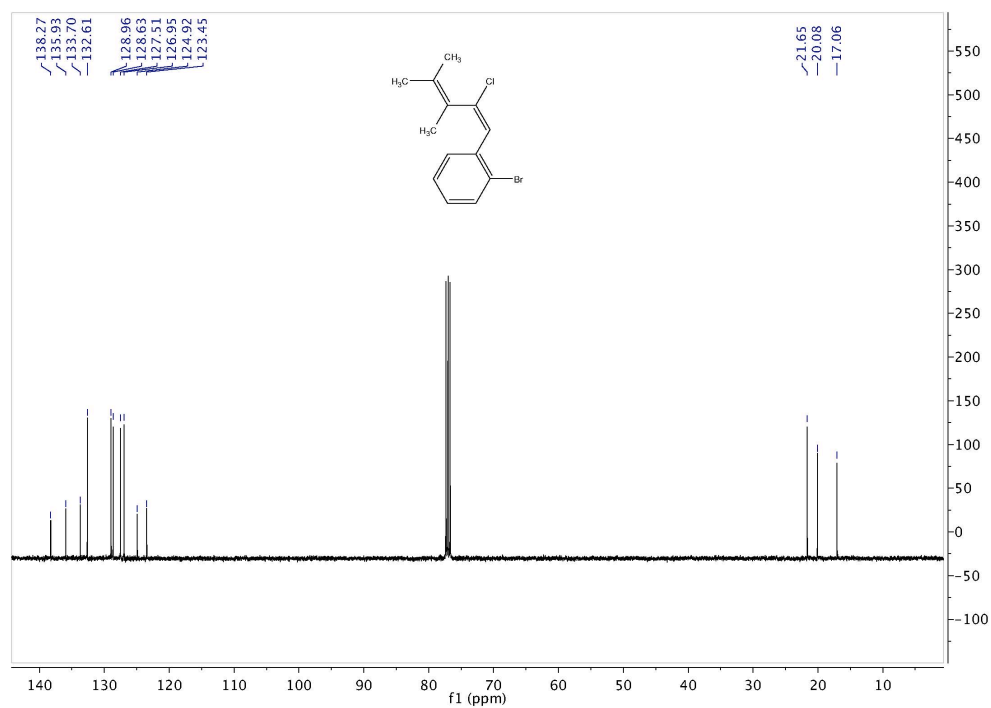

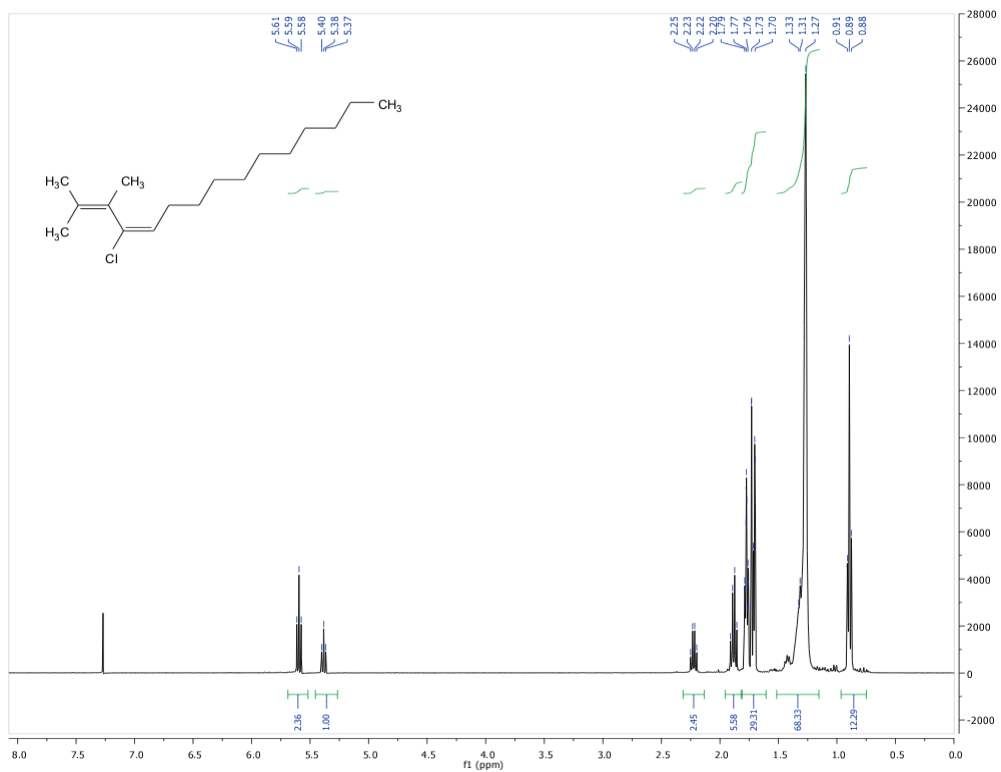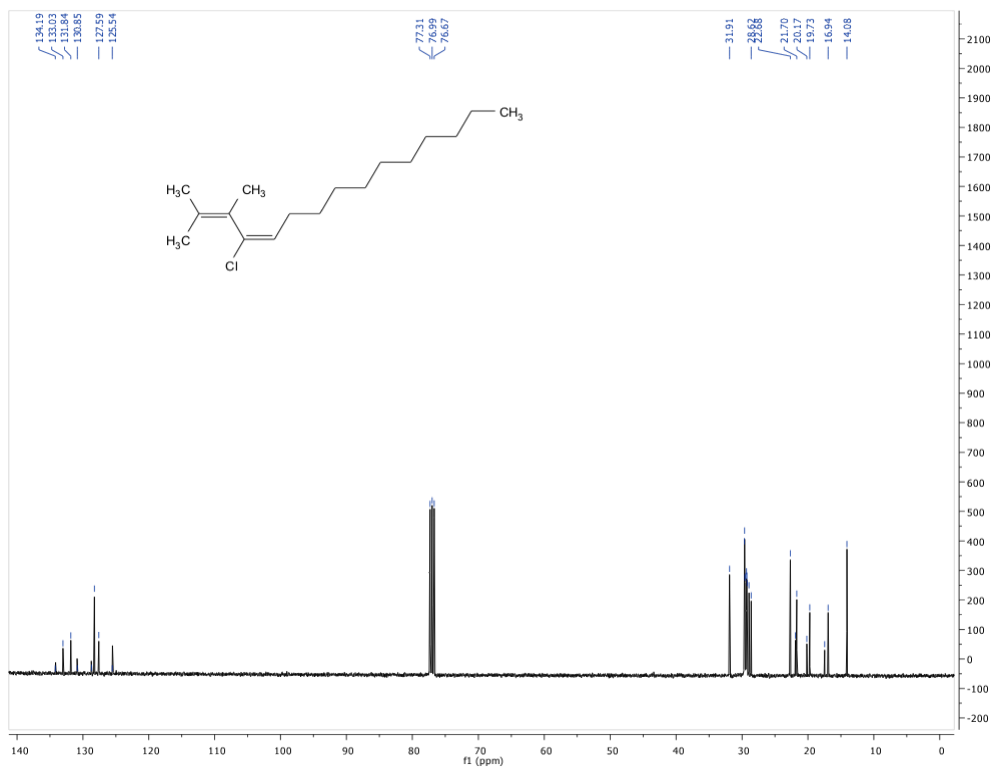

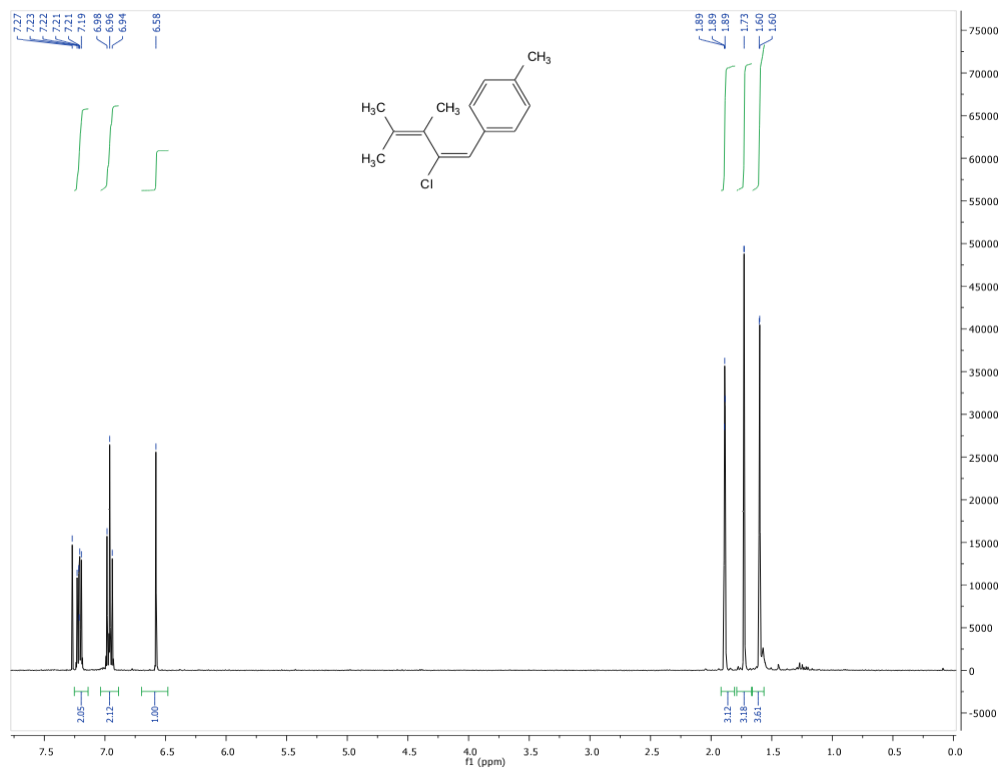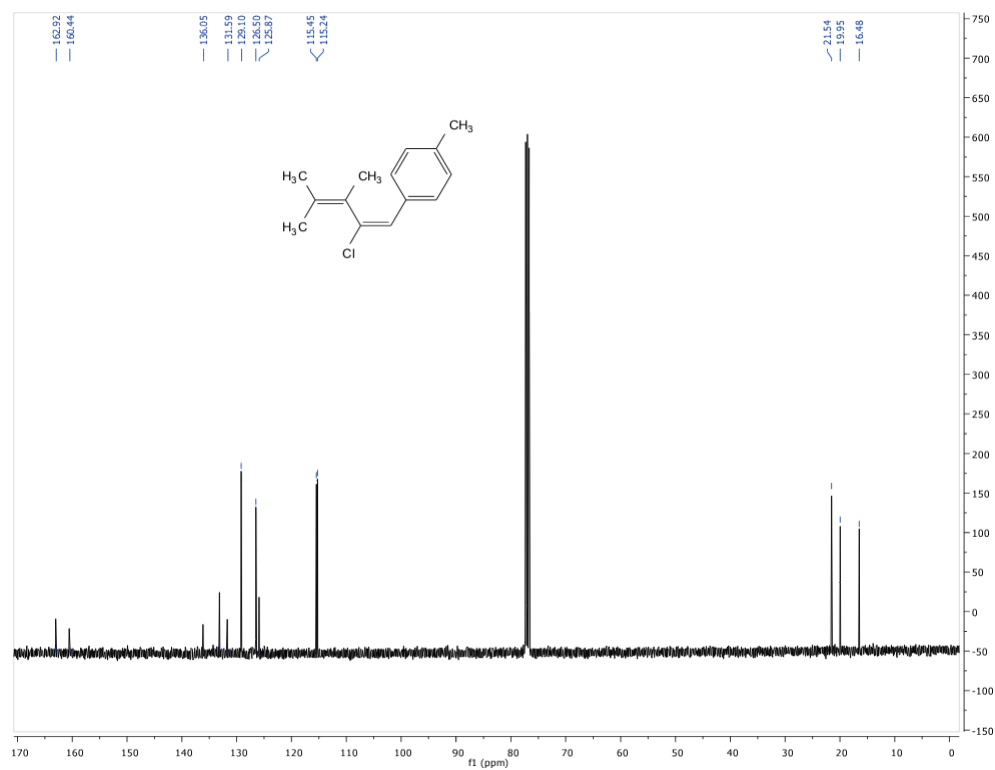

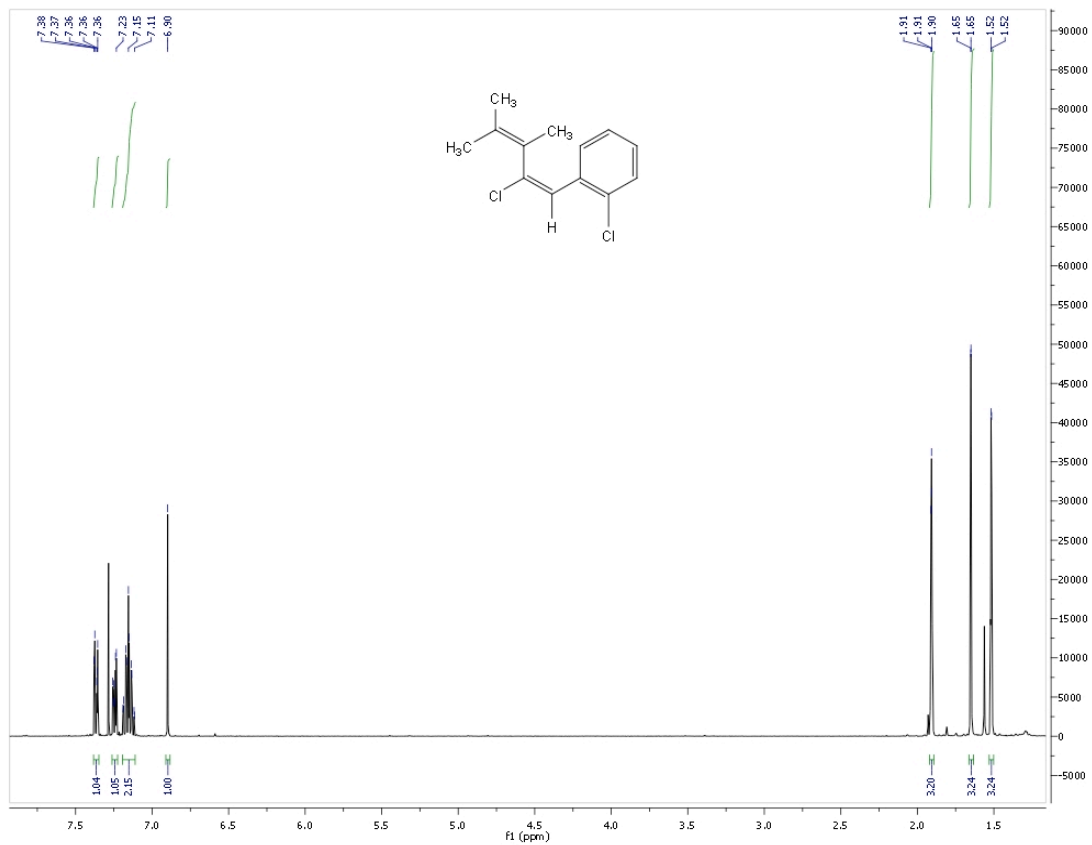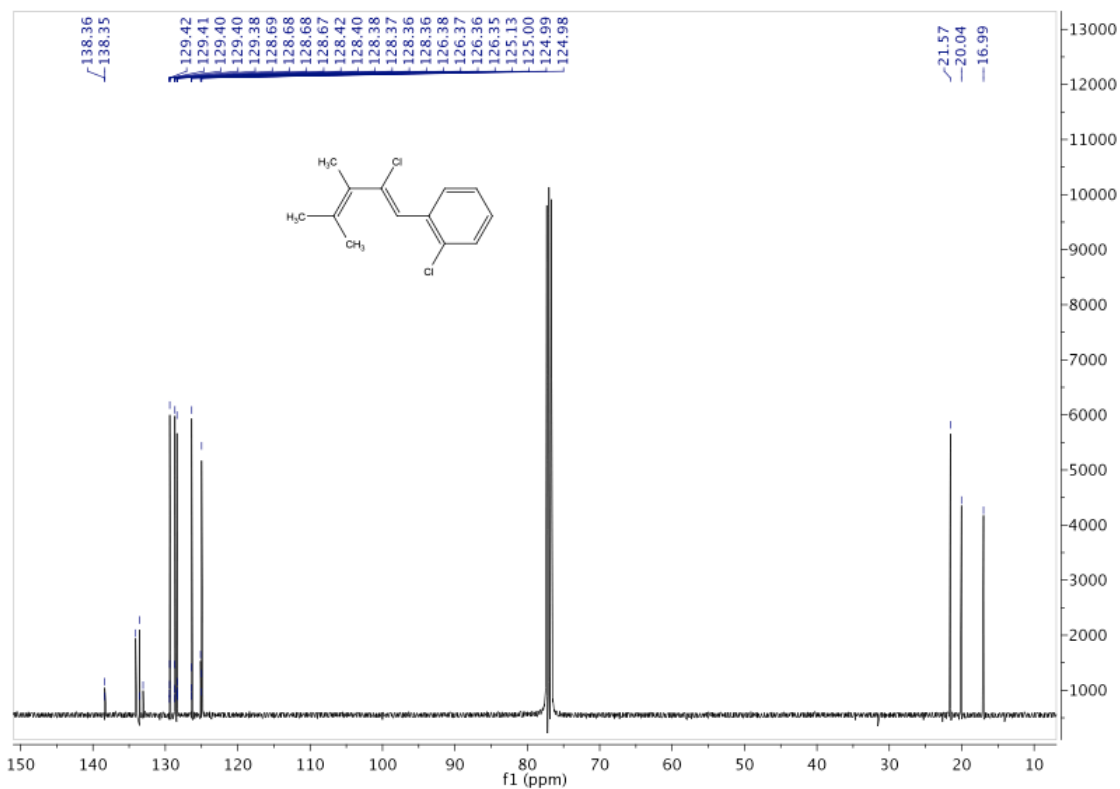

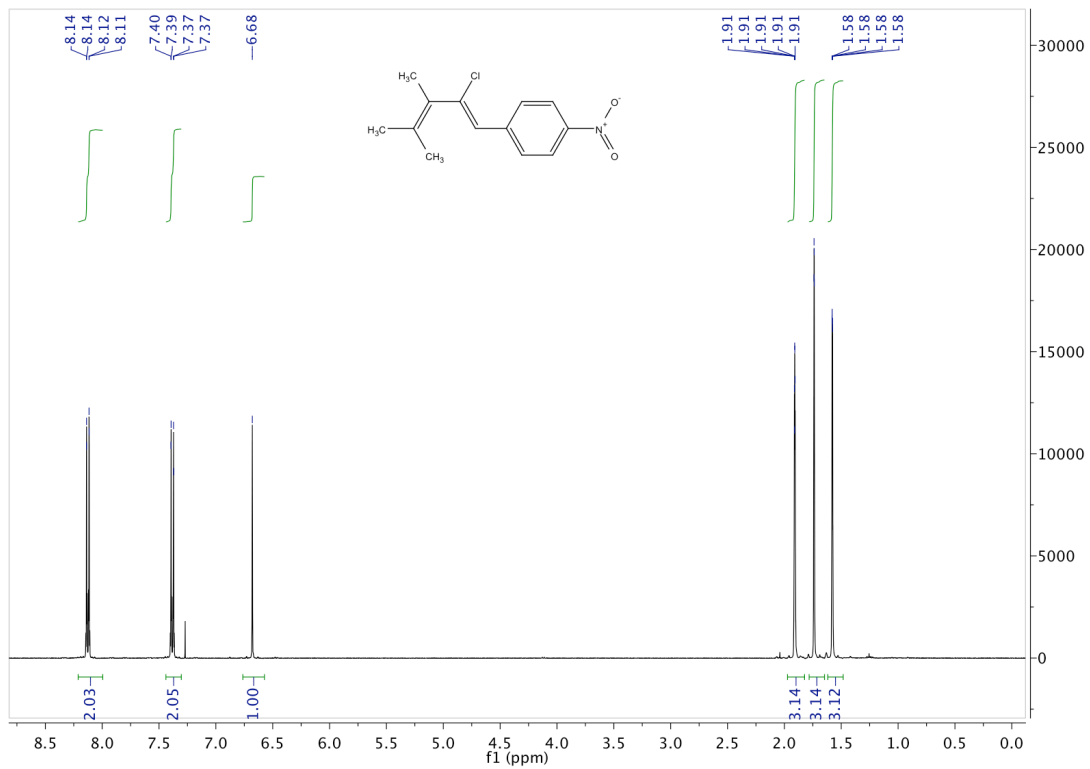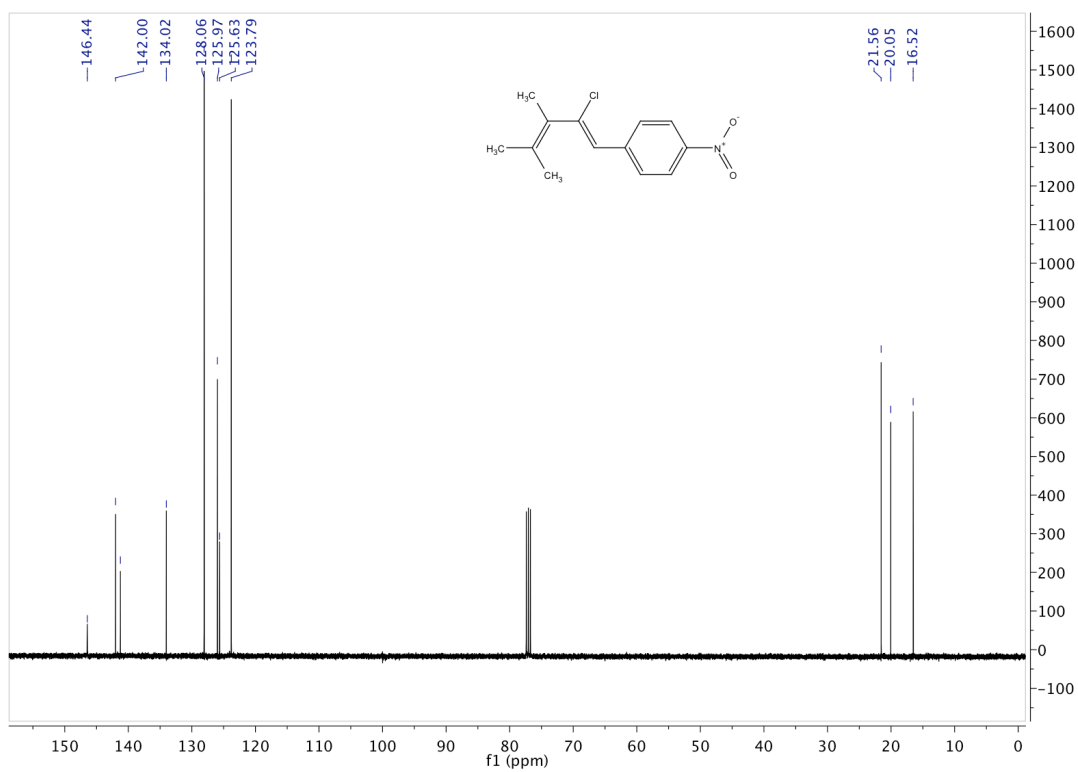

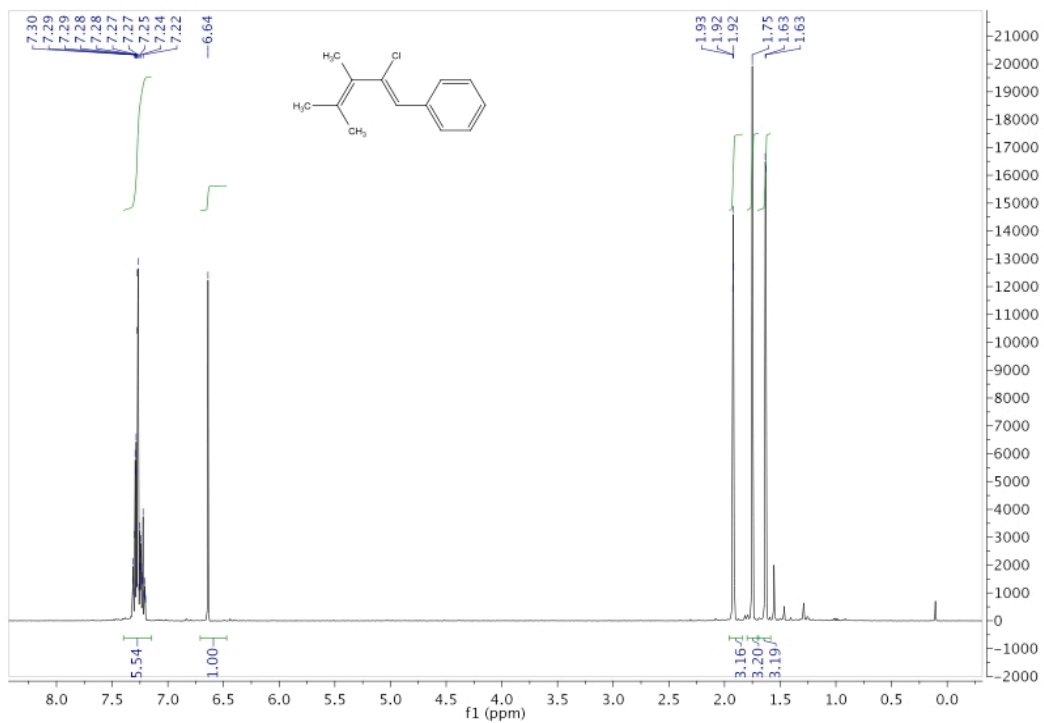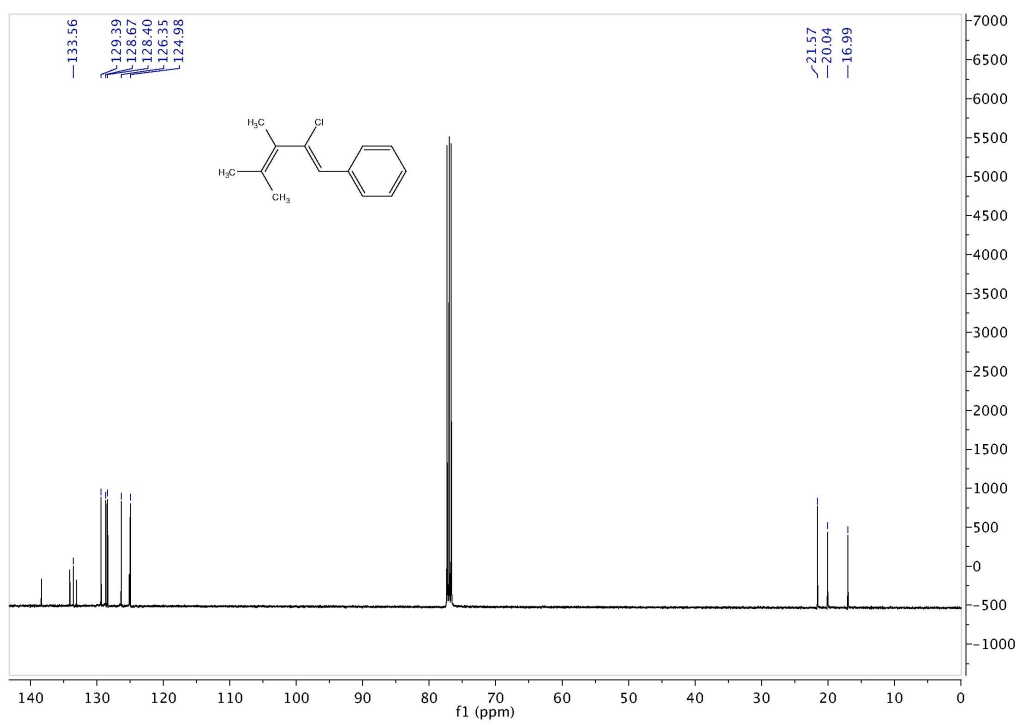

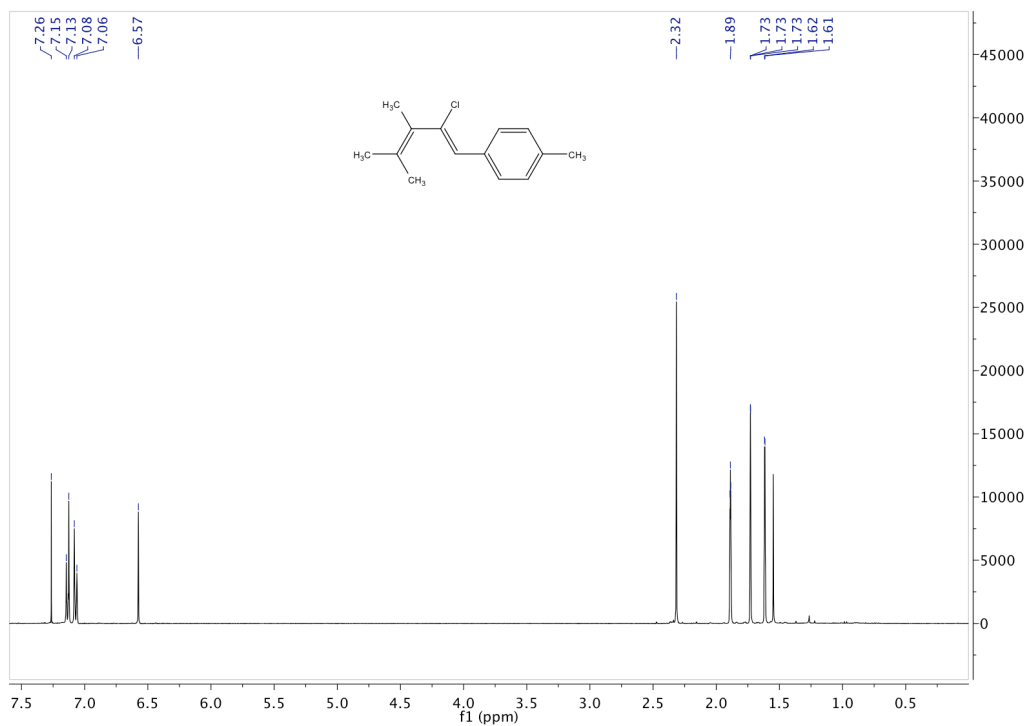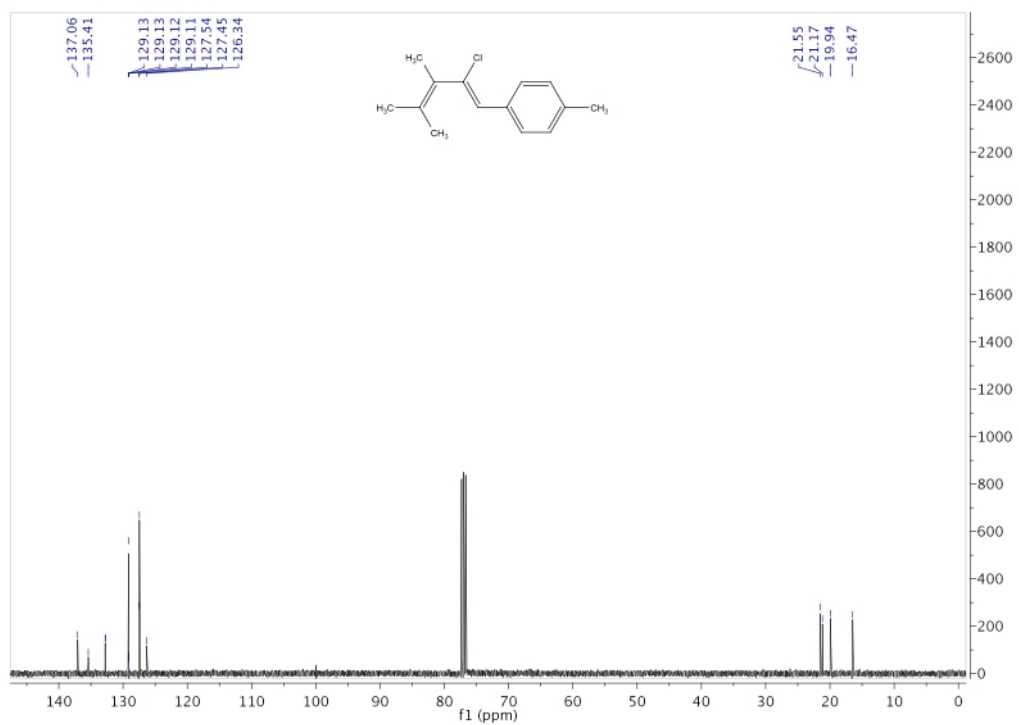



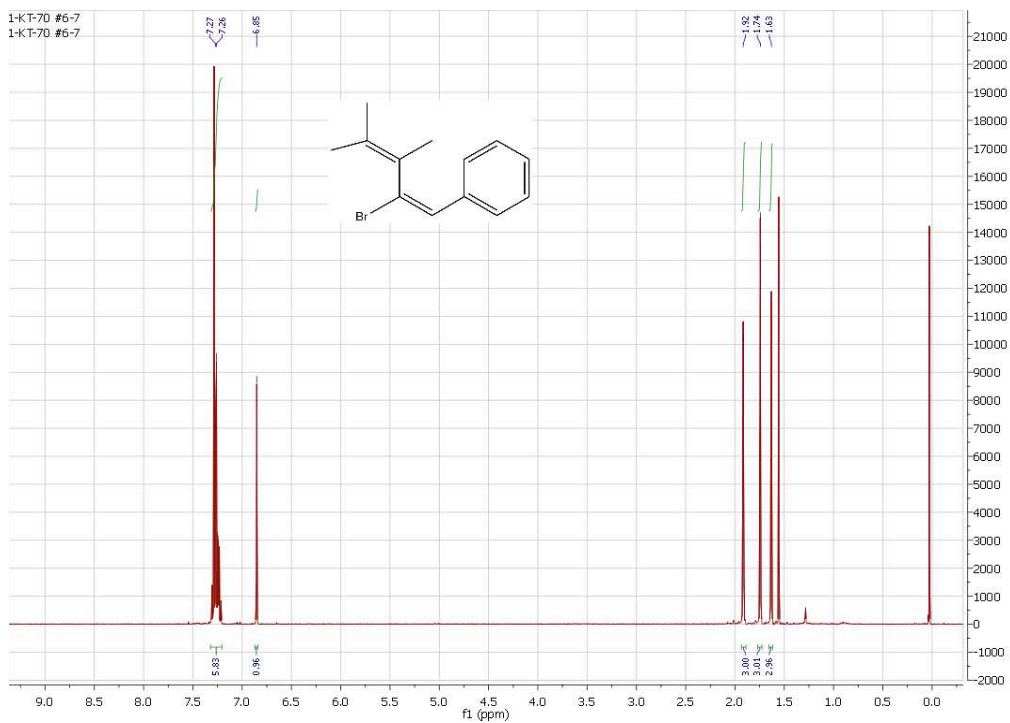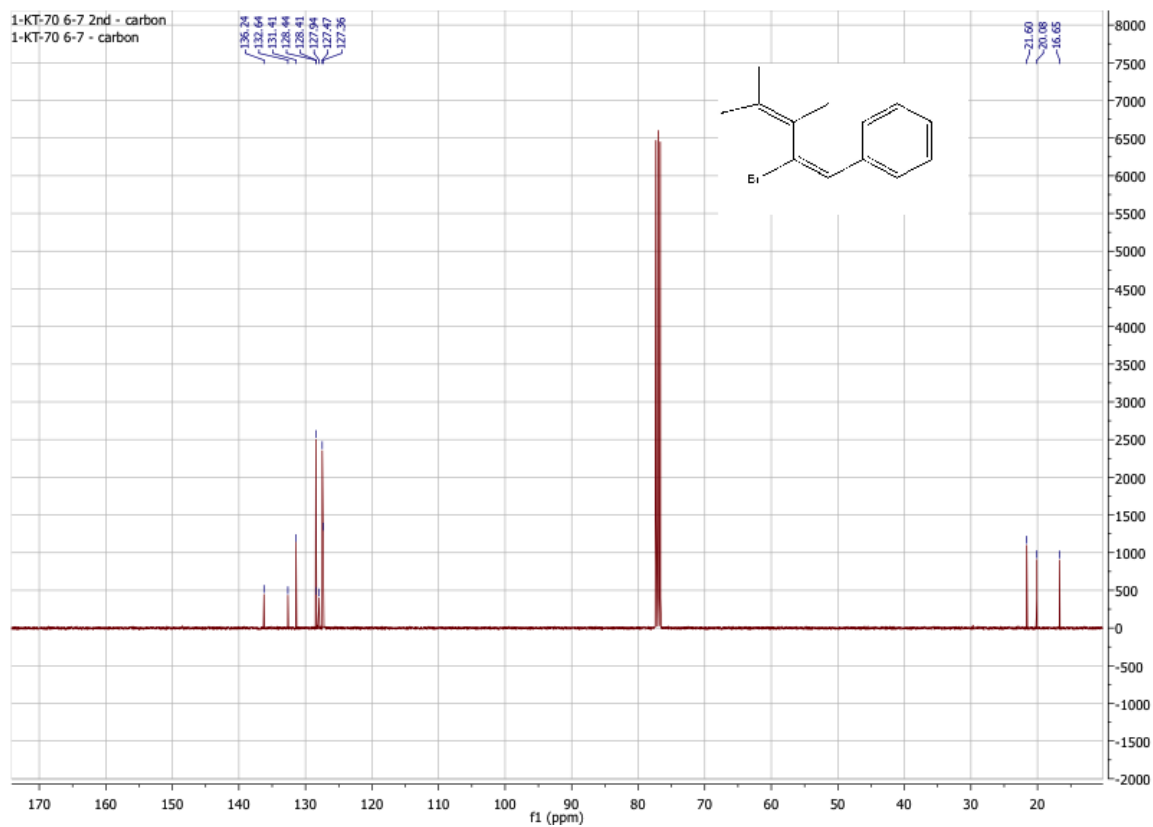

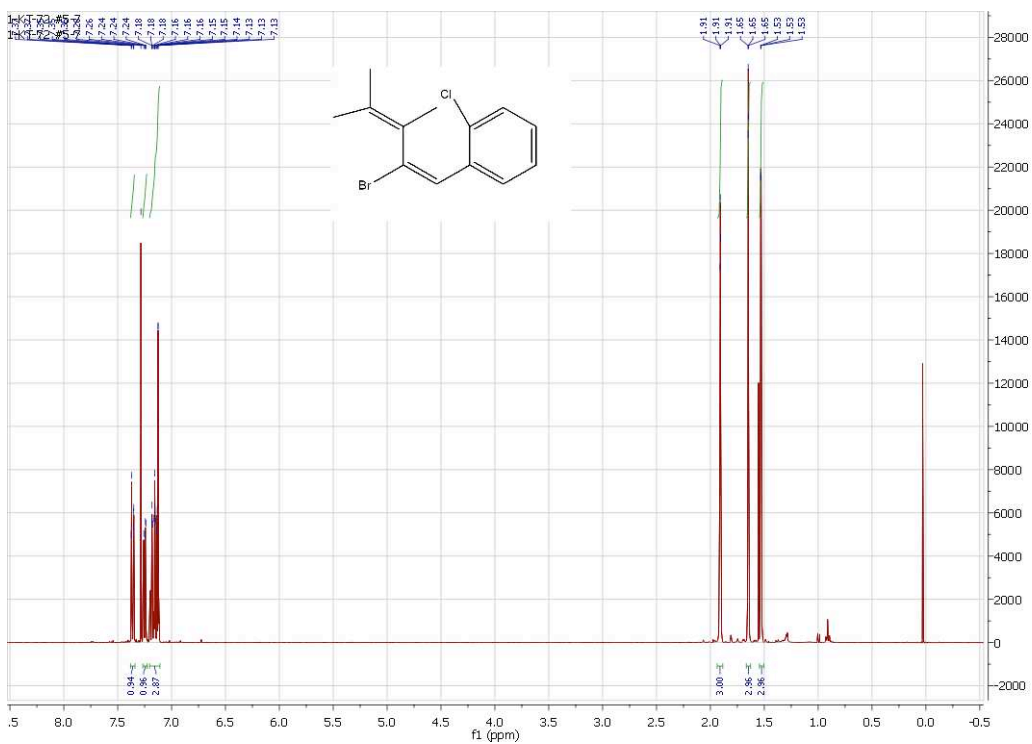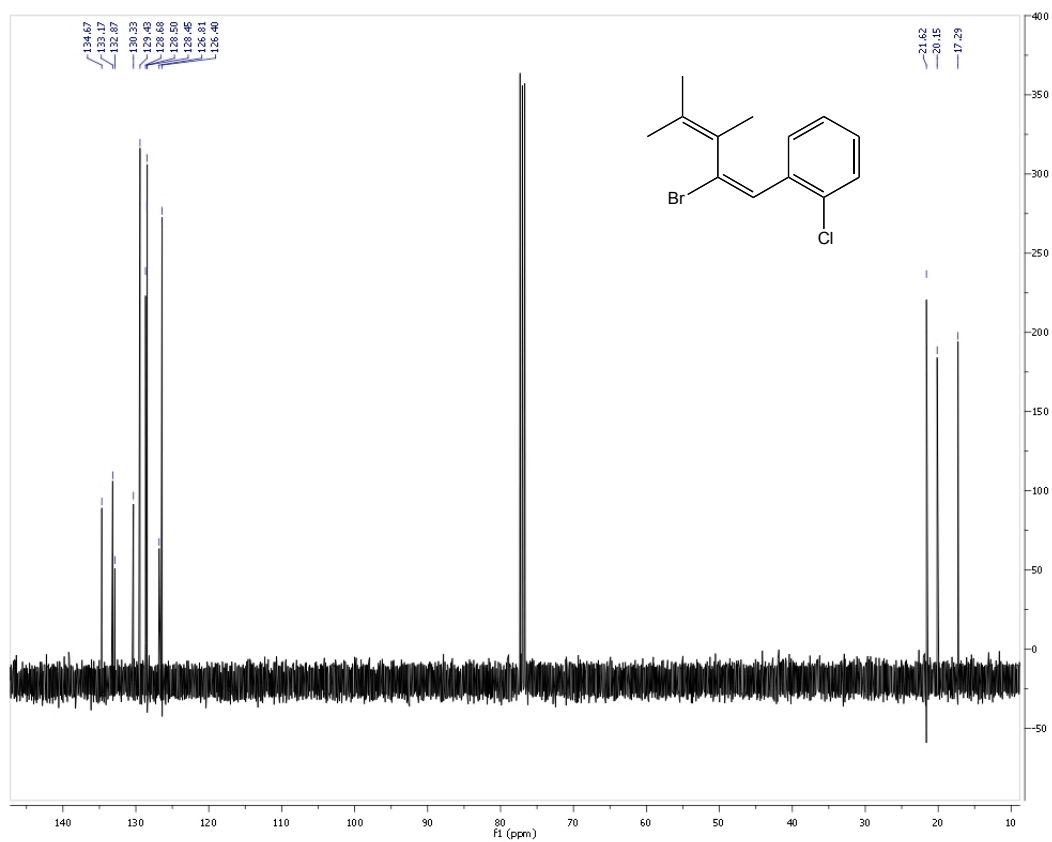

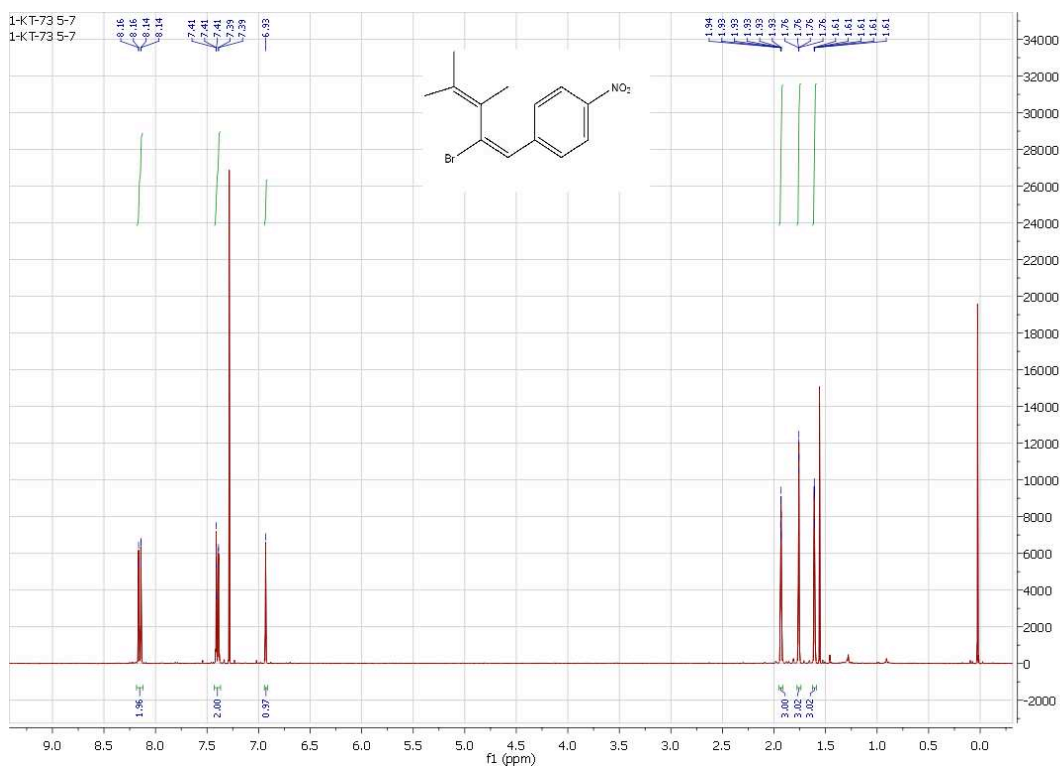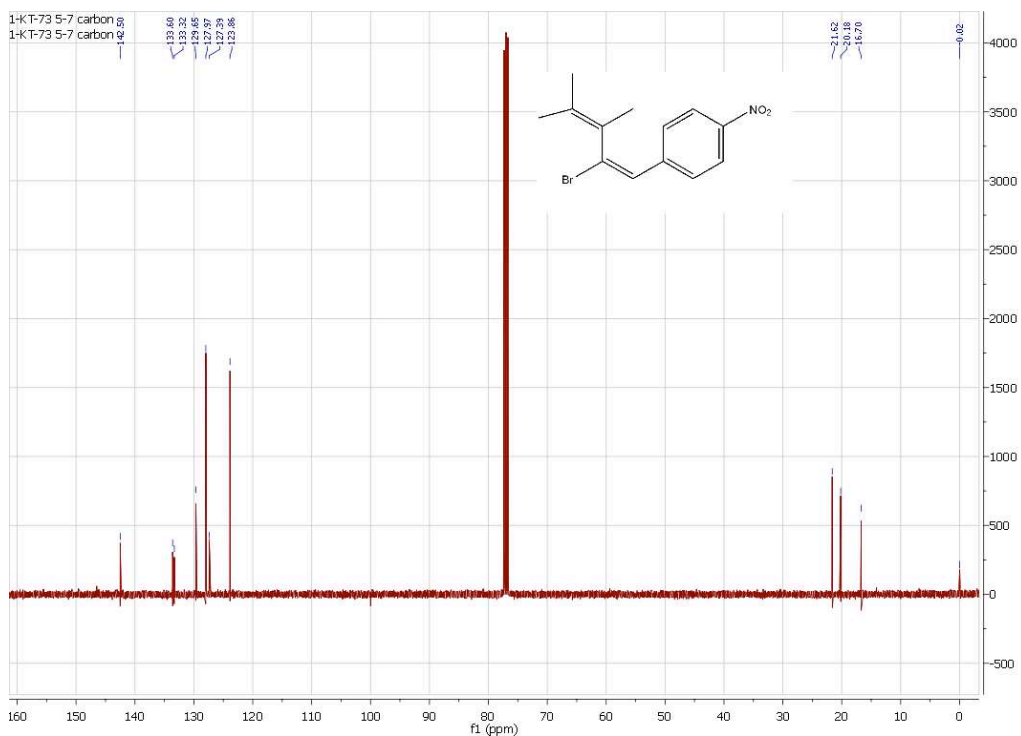

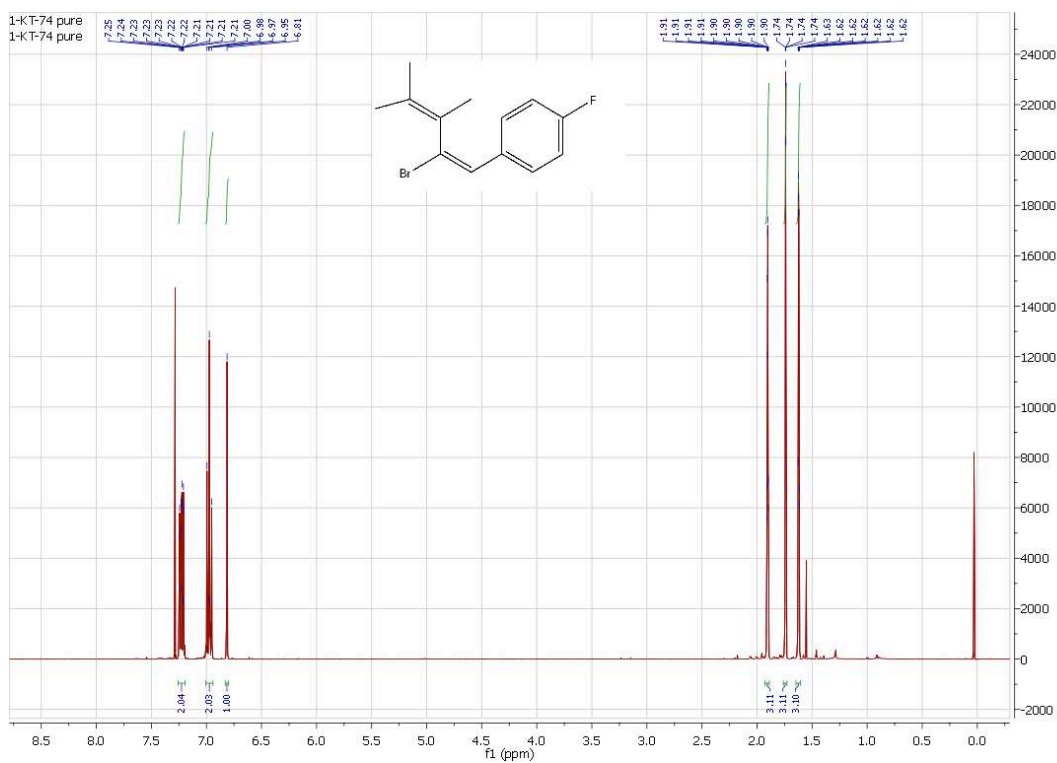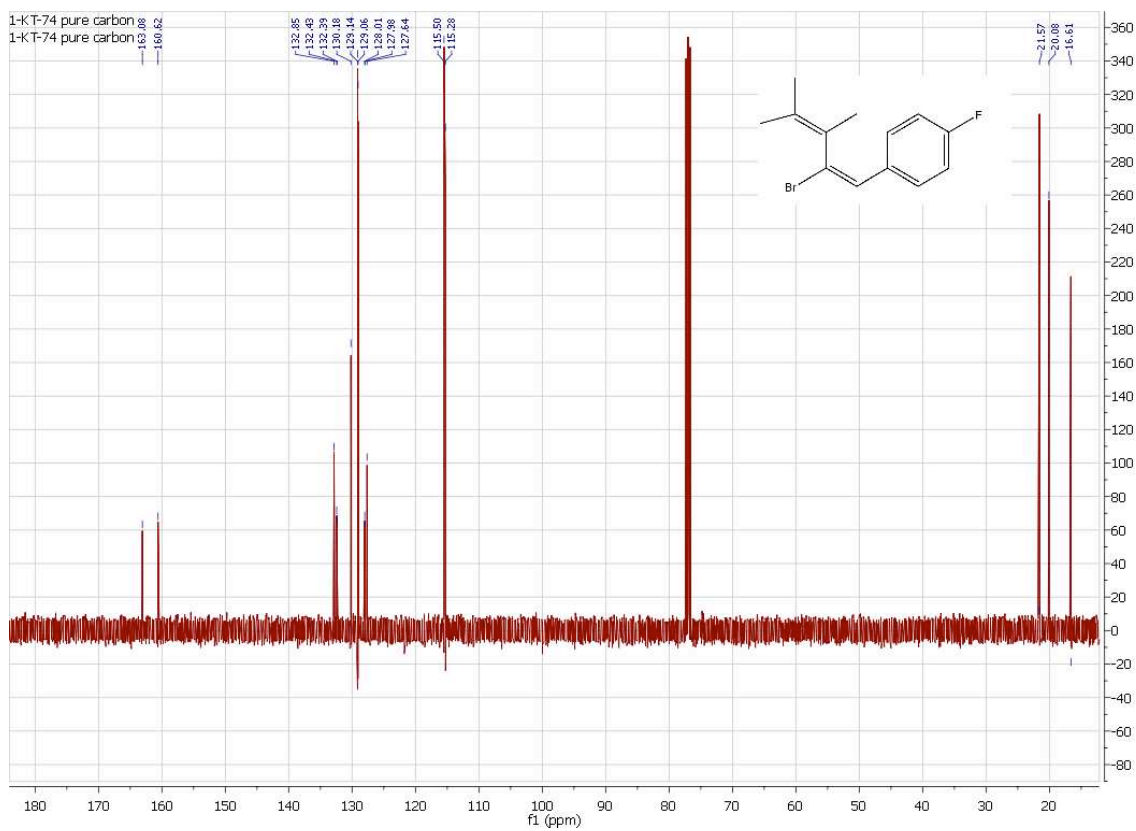

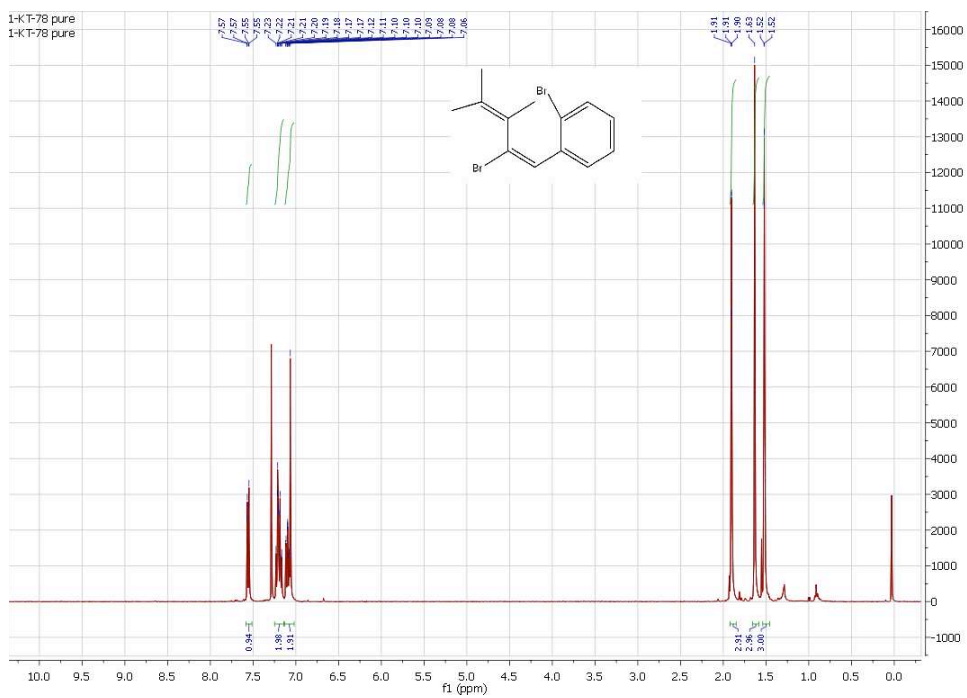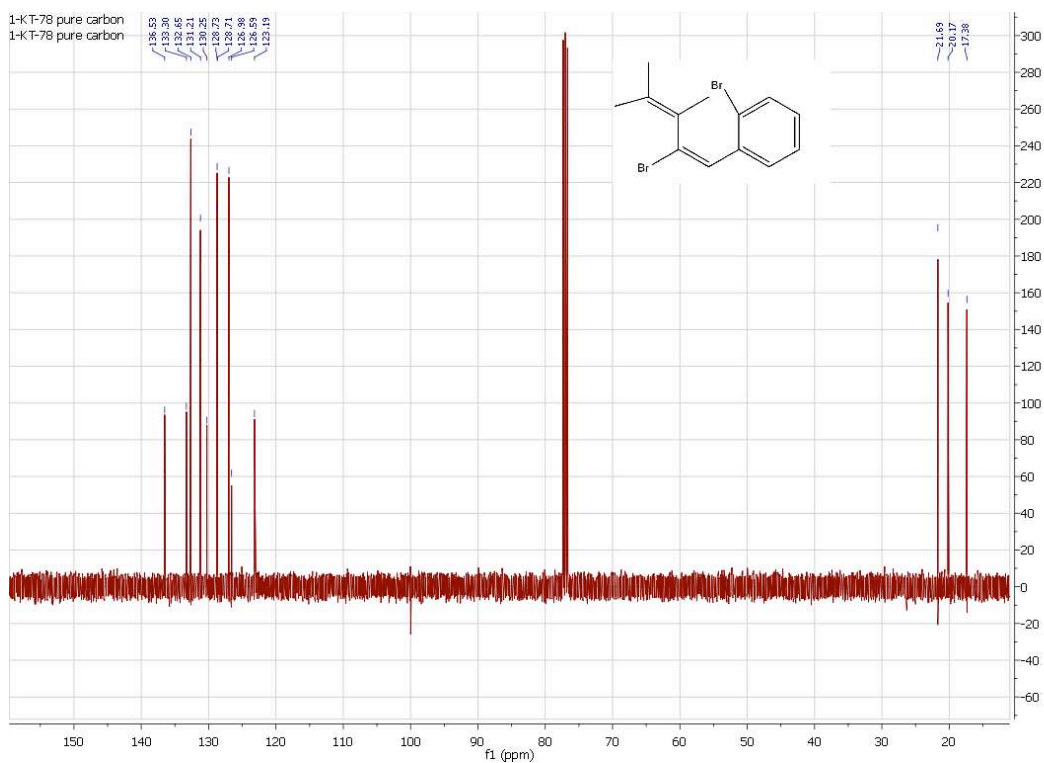

**X-Ray Structure for 5a**

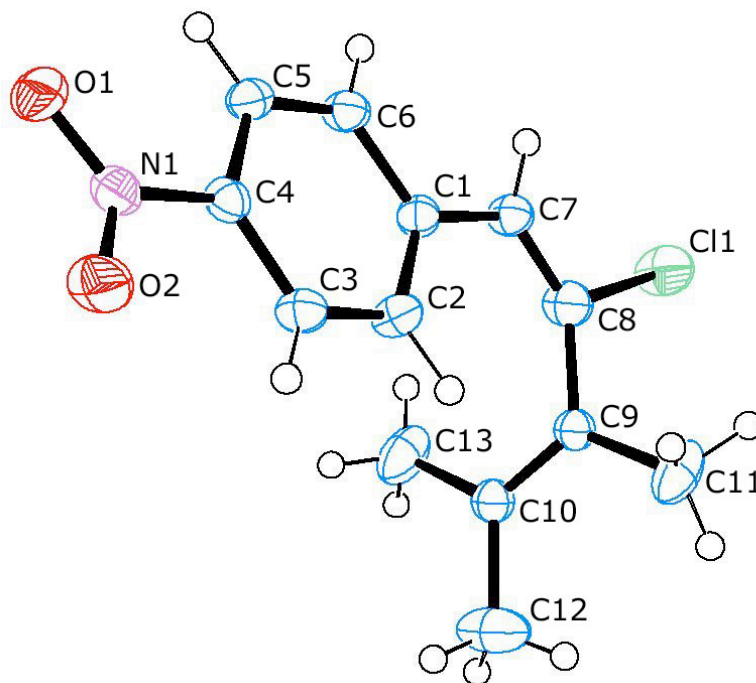

Table 1. Crystal data and structure refinement for **5a**

csuf5\_0m

|                        |                          |                    |
|------------------------|--------------------------|--------------------|
| Empirical formula      | C13 H14 Cl N O2          |                    |
| Formula weight         | 251.70                   |                    |
| Temperature            | 296(2) K                 |                    |
| Wavelength             | 0.71073 Å                |                    |
| Crystal system         | monoclinic               |                    |
| Space group            | P 1 2/n 1                |                    |
| Unit cell dimensions   | a = 13.0021(13) Å        | ∠ = 90°.           |
|                        | b = 7.2565(7) Å          | ∠ = 111.3350(10)°. |
|                        | c = 14.3625(15) Å        | ∠ = 90°.           |
| Volume                 | 1262.2(2) Å <sup>3</sup> |                    |
| Z                      | 4                        |                    |
| Density (calculated)   | 1.325 Mg/m <sup>3</sup>  |                    |
| Absorption coefficient | 0.292 mm <sup>-1</sup>   |                    |

|                                   |                                             |
|-----------------------------------|---------------------------------------------|
| F(000)                            | 528                                         |
| Crystal size                      | 0.38 x 0.33 x 0.18 mm <sup>3</sup>          |
| Theta range for data collection   | 4.03 to 30.62°.                             |
| Index ranges                      | -18<=h<=18, -10<=k<=10, -20<=l<=14          |
| Reflections collected             | 9111                                        |
| Independent reflections           | 3699 [R(int) = 0.0172]                      |
| Completeness to theta = 30.62°    | 94.7 %                                      |
| Refinement method                 | Full-matrix least-squares on F <sup>2</sup> |
| Data / restraints / parameters    | 3699 / 0 / 189                              |
| Goodness-of-fit on F <sup>2</sup> | 1.048                                       |
| Final R indices [I>2sigma(I)]     | R1 = 0.0456, wR2 = 0.1272                   |
| R indices (all data)              | R1 = 0.0554, wR2 = 0.1354                   |
| Largest diff. peak and hole       | 0.465 and -0.438 e.Å <sup>-3</sup>          |

Table 2. Atomic coordinates (x 10<sup>4</sup>) and equivalent isotropic displacement parameters (Å<sup>2</sup>x 10<sup>3</sup>) for csuf5\_0m. U(eq) is defined as one third of the trace of the orthogonalized U<sup>ij</sup> tensor.

|        | x       | y       | z       | U(eq) |
|--------|---------|---------|---------|-------|
| C(1)   | 9183(1) | 2106(2) | 4824(1) | 22(1) |
| C(2)   | 8142(1) | 1402(2) | 4242(1) | 27(1) |
| C(3)   | 7794(1) | 1374(2) | 3211(1) | 26(1) |
| C(4)   | 8486(1) | 2068(2) | 2758(1) | 23(1) |
| C(5)   | 9515(1) | 2792(2) | 3299(1) | 26(1) |
| C(6)   | 9859(1) | 2789(2) | 4332(1) | 25(1) |
| C(7)   | 9631(1) | 2134(2) | 5923(1) | 26(1) |
| C(8)   | 9092(1) | 1914(2) | 6542(1) | 31(1) |
| C(9)   | 7920(2) | 1341(2) | 6329(1) | 23(1) |
| C(10)  | 7125(2) | 2628(3) | 6066(1) | 26(1) |
| C(11)  | 7688(2) | -701(2) | 6405(1) | 40(1) |
| C(12)  | 5926(2) | 2103(3) | 5821(2) | 53(1) |
| C(13)  | 7414(2) | 4646(2) | 6024(2) | 47(1) |
| C(9B)  | 7902(5) | 2602(9) | 6302(4) | 30(1) |
| C(10B) | 7201(5) | 1311(9) | 6205(4) | 32(1) |
| Cl(1)  | 9887(1) | 1980(1) | 7837(1) | 43(1) |
| N(1)   | 8114(1) | 2035(2) | 1664(1) | 28(1) |

|      |         |         |         |       |
|------|---------|---------|---------|-------|
| O(1) | 8677(1) | 2826(2) | 1265(1) | 38(1) |
| O(2) | 7245(1) | 1235(2) | 1199(1) | 39(1) |

---



Table 3. Bond lengths [ $\text{\AA}$ ] and angles [ $^\circ$ ] for csuf5\_0m.

---

|              |            |
|--------------|------------|
| C(1)-C(6)    | 1.4020(17) |
| C(1)-C(2)    | 1.4031(18) |
| C(1)-C(7)    | 1.4710(18) |
| C(2)-C(3)    | 1.3814(18) |
| C(2)-H(2A)   | 0.9300     |
| C(3)-C(4)    | 1.3829(18) |
| C(3)-H(3A)   | 0.9300     |
| C(4)-C(5)    | 1.3834(18) |
| C(4)-N(1)    | 1.4665(16) |
| C(5)-C(6)    | 1.3855(18) |
| C(5)-H(5A)   | 0.9300     |
| C(6)-H(6A)   | 0.9300     |
| C(7)-C(8)    | 1.3256(19) |
| C(7)-H(1)    | 0.95(2)    |
| C(8)-C(9)    | 1.501(2)   |
| C(8)-C(9B)   | 1.541(6)   |
| C(8)-Cl(1)   | 1.7691(15) |
| C(9)-C(10)   | 1.341(3)   |
| C(9)-C(11)   | 1.524(2)   |
| C(10)-C(12)  | 1.516(3)   |
| C(10)-C(13)  | 1.518(2)   |
| C(11)-C(10B) | 1.575(6)   |
| C(11)-H(11A) | 0.9600     |
| C(11)-H(11B) | 0.9600     |
| C(11)-H(11C) | 0.9600     |
| C(12)-C(10B) | 1.648(7)   |
| C(12)-H(12C) | 0.9600     |
| C(12)-H(12A) | 0.9600     |
| C(12)-H(12B) | 0.9600     |
| C(13)-C(9B)  | 1.605(6)   |
| C(13)-H(13A) | 0.9600     |
| C(13)-H(13C) | 0.9600     |
| C(13)-H(13B) | 0.9600     |
| C(9B)-C(10B) | 1.279(9)   |

|                   |            |
|-------------------|------------|
| N(1)-O(1)         | 1.2246(16) |
| N(1)-O(2)         | 1.2294(16) |
| C(6)-C(1)-C(2)    | 118.30(12) |
| C(6)-C(1)-C(7)    | 117.38(11) |
| C(2)-C(1)-C(7)    | 124.29(11) |
| C(3)-C(2)-C(1)    | 120.85(12) |
| C(3)-C(2)-H(2A)   | 119.6      |
| C(1)-C(2)-H(2A)   | 119.6      |
| C(2)-C(3)-C(4)    | 118.90(12) |
| C(2)-C(3)-H(3A)   | 120.6      |
| C(4)-C(3)-H(3A)   | 120.6      |
| C(3)-C(4)-C(5)    | 122.38(12) |
| C(3)-C(4)-N(1)    | 118.76(11) |
| C(5)-C(4)-N(1)    | 118.86(11) |
| C(4)-C(5)-C(6)    | 118.06(12) |
| C(4)-C(5)-H(5A)   | 121.0      |
| C(6)-C(5)-H(5A)   | 121.0      |
| C(5)-C(6)-C(1)    | 121.50(12) |
| C(5)-C(6)-H(6A)   | 119.2      |
| C(1)-C(6)-H(6A)   | 119.2      |
| C(8)-C(7)-C(1)    | 128.24(12) |
| C(8)-C(7)-H(1)    | 118.4(12)  |
| C(1)-C(7)-H(1)    | 113.4(12)  |
| C(7)-C(8)-C(9)    | 129.92(13) |
| C(7)-C(8)-C(9B)   | 122.9(2)   |
| C(9)-C(8)-C(9B)   | 35.0(2)    |
| C(7)-C(8)-Cl(1)   | 116.91(11) |
| C(9)-C(8)-Cl(1)   | 112.53(10) |
| C(9B)-C(8)-Cl(1)  | 112.4(2)   |
| C(10)-C(9)-C(8)   | 119.04(16) |
| C(10)-C(9)-C(11)  | 123.04(17) |
| C(8)-C(9)-C(11)   | 117.91(16) |
| C(9)-C(10)-C(12)  | 120.77(18) |
| C(9)-C(10)-C(13)  | 120.46(17) |
| C(12)-C(10)-C(13) | 118.76(17) |

|                     |          |
|---------------------|----------|
| C(9)-C(11)-C(10B)   | 33.1(2)  |
| C(9)-C(11)-H(11A)   | 109.5    |
| C(10B)-C(11)-H(11A) | 78.9     |
| C(9)-C(11)-H(11B)   | 109.5    |
| C(10B)-C(11)-H(11B) | 134.0    |
| H(11A)-C(11)-H(11B) | 109.5    |
| C(9)-C(11)-H(11C)   | 109.5    |
| C(10B)-C(11)-H(11C) | 109.6    |
| H(11A)-C(11)-H(11C) | 109.5    |
| H(11B)-C(11)-H(11C) | 109.5    |
| C(10)-C(12)-C(10B)  | 35.5(2)  |
| C(10)-C(12)-H(12C)  | 109.5    |
| C(10B)-C(12)-H(12C) | 76.7     |
| C(10)-C(12)-H(12A)  | 109.5    |
| C(10B)-C(12)-H(12A) | 109.2    |
| H(12C)-C(12)-H(12A) | 109.5    |
| C(10)-C(12)-H(12B)  | 109.5    |
| C(10B)-C(12)-H(12B) | 135.6    |
| H(12C)-C(12)-H(12B) | 109.5    |
| H(12A)-C(12)-H(12B) | 109.5    |
| C(10)-C(13)-C(9B)   | 35.0(2)  |
| C(10)-C(13)-H(13A)  | 109.5    |
| C(9B)-C(13)-H(13A)  | 130.1    |
| C(10)-C(13)-H(13C)  | 109.5    |
| C(9B)-C(13)-H(13C)  | 115.3    |
| H(13A)-C(13)-H(13C) | 109.5    |
| C(10)-C(13)-H(13B)  | 109.5    |
| C(9B)-C(13)-H(13B)  | 75.4     |
| H(13A)-C(13)-H(13B) | 109.5    |
| H(13C)-C(13)-H(13B) | 109.5    |
| C(10B)-C(9B)-C(8)   | 113.9(5) |
| C(10B)-C(9B)-C(13)  | 116.6(5) |
| C(8)-C(9B)-C(13)    | 129.0(4) |
| C(9B)-C(10B)-C(11)  | 115.9(6) |
| C(9B)-C(10B)-C(12)  | 111.8(5) |
| C(11)-C(10B)-C(12)  | 132.2(4) |

|                |            |
|----------------|------------|
| O(1)-N(1)-O(2) | 123.74(12) |
| O(1)-N(1)-C(4) | 118.29(11) |
| O(2)-N(1)-C(4) | 117.97(11) |

---

Symmetry transformations used to generate equivalent atoms:

Table 4. Anisotropic displacement parameters ( $\text{\AA}^2 \times 10^3$ ) for csuf5\_A. The anisotropic displacement factor exponent takes the form:  $-2\pi^2 [ h^2 a^* 2U_{11} + \dots + 2 h k a^* b^* U^{12} ]$

|        | U <sup>11</sup> | U <sup>22</sup> | U <sup>33</sup> | U <sup>23</sup> | U <sup>13</sup> | U <sup>12</sup> |
|--------|-----------------|-----------------|-----------------|-----------------|-----------------|-----------------|
| C(1)   | 23(1)           | 23(1)           | 22(1)           | -1(1)           | 10(1)           | 1(1)            |
| C(2)   | 25(1)           | 32(1)           | 26(1)           | -2(1)           | 12(1)           | -5(1)           |
| C(3)   | 22(1)           | 31(1)           | 26(1)           | -3(1)           | 9(1)            | -3(1)           |
| C(4)   | 22(1)           | 27(1)           | 20(1)           | 0(1)            | 8(1)            | 4(1)            |
| C(5)   | 21(1)           | 34(1)           | 24(1)           | 1(1)            | 10(1)           | -1(1)           |
| C(6)   | 20(1)           | 32(1)           | 24(1)           | -1(1)           | 8(1)            | -2(1)           |
| C(7)   | 24(1)           | 31(1)           | 24(1)           | -2(1)           | 9(1)            | -1(1)           |
| C(8)   | 28(1)           | 44(1)           | 22(1)           | -1(1)           | 9(1)            | 0(1)            |
| C(9)   | 27(1)           | 21(1)           | 24(1)           | -2(1)           | 14(1)           | -3(1)           |
| C(10)  | 29(1)           | 26(1)           | 26(1)           | -1(1)           | 15(1)           | -2(1)           |
| C(11)  | 63(1)           | 23(1)           | 46(1)           | 0(1)            | 33(1)           | -4(1)           |
| C(12)  | 30(1)           | 78(1)           | 53(1)           | -12(1)          | 19(1)           | -6(1)           |
| C(13)  | 68(1)           | 26(1)           | 65(1)           | 7(1)            | 45(1)           | 5(1)            |
| C(9B)  | 33(3)           | 32(3)           | 27(3)           | -2(2)           | 14(2)           | 7(2)            |
| C(10B) | 38(3)           | 31(3)           | 31(3)           | -6(2)           | 19(3)           | 4(2)            |
| Cl(1)  | 37(1)           | 71(1)           | 22(1)           | -2(1)           | 10(1)           | -6(1)           |
| N(1)   | 23(1)           | 37(1)           | 22(1)           | 1(1)            | 8(1)            | 6(1)            |
| O(1)   | 33(1)           | 58(1)           | 26(1)           | 5(1)            | 14(1)           | 0(1)            |
| O(2)   | 28(1)           | 58(1)           | 25(1)           | -5(1)           | 4(1)            | -5(1)           |

Table 5. Hydrogen coordinates ( $\times 10^4$ ) and isotropic displacement parameters ( $\times 10^{-3}$ )  
for csuf5\_0m.

|        | x         | y        | z        | U(eq)   |
|--------|-----------|----------|----------|---------|
| H(2A)  | 7681      | 949      | 4553     | 45(5)   |
| H(3A)  | 7106      | 895      | 2829     | 30(4)   |
| H(5A)  | 9963      | 3267     | 2979     | 38(5)   |
| H(6A)  | 10553     | 3251     | 4709     | 40(5)   |
| H(1)   | 10405(16) | 2330(20) | 6200(14) | 35(5)   |
| H(11A) | 7031      | -839     | 6557     | 84(8)   |
| H(11B) | 8300      | -1255    | 6926     | 95(10)  |
| H(11C) | 7585      | -1295    | 5781     | 89(9)   |
| H(12C) | 5889      | 997      | 6174     | 50(6)   |
| H(12A) | 5579      | 1898     | 5115     | 166(18) |
| H(12B) | 5553      | 3081     | 6019     | 87(9)   |
| H(13A) | 6992      | 5384     | 6311     | 62(6)   |
| H(13C) | 7244      | 5004     | 5341     | 93(9)   |
| H(13B) | 8187      | 4825     | 6394     | 91(9)   |

## Computational Details

Gaussian 09<sup>3</sup> was used to fully optimize all the structures reported in this paper at the B3LYP level of density functional theory.<sup>4</sup> The 6-311G(d) basis set was chosen to describe titanium. The 6-31G(d) basis set was used for other atoms. This basis set combination will be referred to as BS1. Frequency calculations were carried out at the same level of theory as for structural optimization. To further refine the energies obtained from the B3LYP/BS1 calculations, we carried out single point energy calculations for all the structures with the larger 6-311+G(2d,p) basis set (BS2). The solvation energies were calculated using BS2 on gas phase optimized geometries with the CPCM solvation model<sup>5</sup> using dichloromethane as a solvent. To estimate the corresponding Gibbs free energies in solvent ( $\Delta G$ ), entropy corrections were calculated at the B3LYP/BS1 level and added to the solvent potential energies. We have used the solvent energies throughout the paper unless otherwise stated.

**Table S1.** Cartesian coordinates and total energies for all of the calculated structures

### Ph

E(BS1) = -732.812878 a.u.

G(BS1) = -732.568723 a.u.

E(BS2,solvent) = -733.050411 a.u.

|   |             |             |             |
|---|-------------|-------------|-------------|
| C | -1.71434300 | -1.71737900 | 0.01364900  |
| C | -1.21309900 | -0.52766500 | 0.18203100  |
| C | -2.72280700 | -0.58936600 | 0.11346700  |
| C | -3.55728200 | -0.42959800 | 1.38497600  |
| H | -3.81320100 | 0.62386700  | 1.56284800  |
| H | -4.50437100 | -0.98197600 | 1.31197400  |
| H | -3.01875900 | -0.79818400 | 2.26538600  |
| C | -3.44190900 | -0.09171200 | -1.13983600 |
| H | -4.37942200 | -0.64039800 | -1.30653900 |
| H | -3.70138100 | 0.97188000  | -1.05077000 |
| H | -2.81428800 | -0.21040900 | -2.02946700 |
| C | -1.55295500 | -3.18577400 | -0.11159200 |
| H | -2.00955900 | -3.55024100 | -1.04085600 |
| H | -0.49723200 | -3.47578600 | -0.10594300 |
| H | -2.05950500 | -3.70257000 | 0.71406100  |
| C | -0.04841100 | 0.35856700  | 0.42108500  |
| H | -0.08653700 | 0.75581800  | 1.44061200  |
| C | 1.29668000  | -0.30175000 | 0.19002800  |
| C | 2.30996400  | -0.18357000 | 1.14762200  |
| C | 1.55088700  | -1.01525400 | -0.98945400 |
| C | 3.55413800  | -0.78280300 | 0.93929400  |

<sup>3</sup> M. J. Frisch, et al. *Gaussian 09*, revision A.02; Gaussian, Inc.: Wallingford, CT, 2009.

<sup>4</sup> a) C. T. Lee, W. T. Yang, R. G. Parr, *Phys. Rev. B* **1988**, *37*, 785; b) B. Miehlich, A. Savin, H. Stoll, H. Preuss, *Chem. Phys. Lett.* **1989**, *157*, 200; c) A. D. Becke, *J. Chem. Phys.* **1993**, *98*, 5648.

<sup>5</sup> V. Barone, M. Cossi, *J. Phys. Chem. A* **1998**, *102*, 1995.

|   |             |             |             |
|---|-------------|-------------|-------------|
| H | 2.12533600  | 0.39041100  | 2.05151100  |
| C | 2.79455600  | -1.60945400 | -1.20062900 |
| H | 0.76892500  | -1.10209900 | -1.73855000 |
| C | 3.79837100  | -1.49752500 | -0.23424400 |
| H | 4.33228800  | -0.68663000 | 1.69179000  |
| H | 2.98140200  | -2.16089700 | -2.11847700 |
| H | 4.76662600  | -1.96324700 | -0.39805200 |
| O | -0.20482700 | 1.50492400  | -0.48085800 |
| C | 0.22673600  | 2.70068100  | -0.01351200 |
| O | 0.69340000  | 2.87302900  | 1.09206200  |
| C | 0.04876100  | 3.77475700  | -1.06214300 |
| H | -0.97802100 | 3.77399400  | -1.44056300 |
| H | 0.29245300  | 4.74675400  | -0.63163800 |
| H | 0.71093800  | 3.57316400  | -1.91140600 |

### 1\_Ph\_Cl

E(BS1) = -3423.326578 a.u.

G(BS1) = -3423.088255 a.u.

E(BS2,solvent) = -3423.721254 a.u.

|    |             |             |             |
|----|-------------|-------------|-------------|
| C  | 3.40734700  | -1.36327100 | 1.03860400  |
| C  | 2.63842000  | -1.07583700 | 0.02824300  |
| C  | 2.79241600  | -2.55664500 | 0.33260000  |
| C  | 1.65394800  | -3.32517700 | 1.00330100  |
| H  | 1.01428300  | -3.82354800 | 0.26181800  |
| H  | 2.04685100  | -4.11220700 | 1.66093100  |
| H  | 1.01964500  | -2.66338500 | 1.60122800  |
| C  | 3.67599300  | -3.43786700 | -0.55161500 |
| H  | 4.12385500  | -4.25483300 | 0.02957800  |
| H  | 3.09609200  | -3.90706600 | -1.35920300 |
| H  | 4.48879000  | -2.86246600 | -1.00868600 |
| C  | 4.31491400  | -0.95737700 | 2.13595800  |
| H  | 5.30495100  | -1.41273600 | 2.00601100  |
| H  | 4.43056400  | 0.12962600  | 2.18195100  |
| H  | 3.92755900  | -1.30904400 | 3.10059600  |
| C  | 2.04863100  | -0.03407500 | -0.85043000 |
| H  | 2.30256000  | -0.22500700 | -1.89797500 |
| C  | 2.45804200  | 1.37186800  | -0.47894600 |
| C  | 2.06067100  | 1.92864300  | 0.74441700  |
| C  | 3.26042900  | 2.11689600  | -1.34805400 |
| C  | 2.46489700  | 3.21767400  | 1.08774000  |
| H  | 1.42338400  | 1.35818400  | 1.41339700  |
| C  | 3.67285300  | 3.40437400  | -0.99821500 |
| H  | 3.56619500  | 1.69166900  | -2.30160500 |
| C  | 3.27460100  | 3.95626600  | 0.21964400  |
| H  | 2.14426700  | 3.64822100  | 2.03215700  |
| H  | 4.29668800  | 3.97549400  | -1.68004100 |
| H  | 3.58797200  | 4.96066400  | 0.49051600  |
| O  | 0.57131800  | -0.09215700 | -0.72820600 |
| C  | -0.18349300 | -0.91305300 | -1.42975800 |
| O  | -1.39630900 | -0.94352900 | -1.19600400 |
| C  | 0.39776900  | -1.77804400 | -2.51764400 |
| H  | 1.22898700  | -2.38183900 | -2.14304100 |
| H  | -0.38992800 | -2.42612100 | -2.90110500 |
| H  | 0.77338800  | -1.15180600 | -3.33559100 |
| Ti | -2.80030500 | 0.09287700  | 0.12915100  |
| Cl | -1.55529000 | -0.78054800 | 1.76178800  |

|    |             |             |             |
|----|-------------|-------------|-------------|
| Cl | -2.19599900 | 1.88147100  | -1.04634900 |
| Cl | -4.29170700 | -1.24162100 | -0.79224100 |
| Cl | -4.18077300 | 1.18082500  | 1.48305800  |

**TiCl<sub>4</sub>**

E(BS1) = -2690.507239 a.u.

G(BS1) = -2690.535374 a.u.

E(BS2,solvent) = -2690.670084 a.u.

|    |             |             |             |
|----|-------------|-------------|-------------|
| Ti | 0.00014300  | 0.00022400  | -0.00042100 |
| Cl | -1.63886700 | -1.01736600 | -0.99248600 |
| Cl | 1.88034000  | -0.62118800 | -0.88571400 |
| Cl | -0.23453100 | 2.14423400  | -0.22991800 |
| Cl | -0.00712800 | -0.50596900 | 2.10866200  |

**2\_Ph**

E(BS1) = -504.088269 a.u.

G(BS1) = -503.889511 a.u.

E(BS2,solvent) = -504.289284 a.u.

|   |             |             |             |
|---|-------------|-------------|-------------|
| C | 1.87409300  | 0.86860600  | -0.16683800 |
| C | 1.13620800  | -0.24669400 | -0.07669700 |
| C | 2.66055800  | -0.34147400 | 0.17133700  |
| C | 3.06009400  | -0.61788400 | 1.62512100  |
| H | 3.13134100  | -1.69730100 | 1.79457200  |
| H | 4.04301600  | -0.17655500 | 1.82740900  |
| H | 2.34023400  | -0.20080000 | 2.33483300  |
| C | 3.63062400  | -0.89577700 | -0.86670200 |
| H | 4.63295700  | -0.47913600 | -0.71788500 |
| H | 3.71017100  | -1.98424400 | -0.76196600 |
| H | 3.31155800  | -0.67300400 | -1.88974300 |
| C | 1.98817100  | 2.22866400  | -0.71439000 |
| H | 2.75120800  | 2.24973600  | -1.50401500 |
| H | 1.04142900  | 2.61135800  | -1.10309100 |
| H | 2.35554200  | 2.90160400  | 0.07429700  |
| C | -0.04160400 | -0.95016500 | -0.24281300 |
| H | 0.06353700  | -2.00287600 | -0.50806000 |
| C | -1.36976000 | -0.47264100 | -0.07483800 |
| C | -1.65940600 | 0.84512000  | 0.37659300  |
| C | -2.44560700 | -1.35019600 | -0.38552600 |
| C | -2.97135700 | 1.26949500  | 0.48058400  |
| H | -0.84572100 | 1.50531400  | 0.65823000  |
| C | -3.75710300 | -0.91517100 | -0.28066500 |
| H | -2.22747300 | -2.36061000 | -0.72006200 |
| C | -4.01962500 | 0.39241300  | 0.15033600  |
| H | -3.19547800 | 2.27283200  | 0.82797400  |
| H | -4.57628800 | -1.58274800 | -0.52661700 |
| H | -5.04775900 | 0.73064200  | 0.24111200  |

**[TiCl<sub>4</sub>(OAc)]<sup>-</sup>**

E(BS1) = -2919.118366 a.u.

G(BS1) = -2919.101188 a.u.

E(BS2,solvent) = -2919.425697 a.u.

|   |            |             |             |
|---|------------|-------------|-------------|
| O | 1.48424300 | -0.00554900 | 1.09589100  |
| C | 2.13372900 | -0.00774000 | 0.00601800  |
| O | 1.47605800 | -0.00558200 | -1.08292300 |
| C | 3.64032200 | -0.00658000 | -0.01119700 |



|    |             |             |             |
|----|-------------|-------------|-------------|
| H  | 4.03583500  | -0.10193800 | 1.00186700  |
| H  | 3.99879300  | -0.83085500 | -0.63615700 |
| H  | 3.99380400  | 0.92903600  | -0.45888900 |
| Ti | -0.34601900 | -0.00023700 | -0.00312900 |
| Cl | -0.14956100 | -2.32809000 | -0.00013900 |
| Cl | -0.13108300 | 2.32728900  | -0.00012700 |
| Cl | -1.71172500 | 0.00582700  | -1.81072400 |
| Cl | -1.69838000 | 0.00579400  | 1.81624600  |

### 3Ph

E(BS1) = -504.1061092 a.u.

G(BS1) = -503.909358 a.u.

E(BS2,solvent) = -504.3152005 a.u.

|   |             |             |             |
|---|-------------|-------------|-------------|
| C | 2.12640400  | 0.58860900  | -0.13156900 |
| C | 0.87280700  | 0.40280700  | -0.61912300 |
| C | 2.94952800  | -0.55235400 | 0.03633100  |
| C | 2.51140100  | -1.93374500 | -0.28164400 |
| H | 3.20080700  | -2.36226100 | -1.02441900 |
| H | 2.63120200  | -2.56075700 | 0.61415100  |
| H | 1.48765800  | -2.00524000 | -0.64696300 |
| C | 4.33264800  | -0.38352100 | 0.55720000  |
| H | 4.30491600  | 0.08141600  | 1.55397200  |
| H | 4.87719000  | -1.32675400 | 0.61925800  |
| H | 4.89438000  | 0.31995600  | -0.07394600 |
| C | 2.62149600  | 1.98680800  | 0.21121700  |
| H | 3.48584100  | 2.26094600  | -0.40419000 |
| H | 1.83513700  | 2.72263100  | 0.03649300  |
| H | 2.92287300  | 2.05351000  | 1.26239300  |
| C | -0.32883800 | 0.31990100  | -1.11474200 |
| H | -0.36576500 | 0.39201800  | -2.20770800 |
| C | -1.61943700 | 0.13071000  | -0.43275400 |
| C | -1.71593600 | 0.05177700  | 0.96857500  |
| C | -2.77987700 | 0.03274500  | -1.21793600 |
| C | -2.95742500 | -0.12265500 | 1.56861500  |
| H | -0.82302200 | 0.13099600  | 1.58336500  |
| C | -4.02107800 | -0.14213700 | -0.60895400 |
| H | -2.70922200 | 0.09500800  | -2.30052000 |
| C | -4.11143700 | -0.22030800 | 0.78189100  |
| H | -3.02976100 | -0.18117300 | 2.65032500  |
| H | -4.91485500 | -0.21623800 | -1.22048900 |
| H | -5.07891500 | -0.35588100 | 1.25563700  |

### 4\_Ph\_Cl

E(BS1) = -3423.337915 a.u.

G(BS1) = -3423.104592 a.u.

E(BS2,solvent) = -3423.74733 a.u.

|   |             |            |             |
|---|-------------|------------|-------------|
| C | -1.33180000 | 1.51798400 | 0.50292600  |
| C | -2.05628500 | 0.40192900 | 0.25003800  |
| C | -1.05417300 | 2.39253300 | -0.57171400 |
| C | -1.67711100 | 2.25524300 | -1.91812000 |
| H | -2.38212600 | 3.08993700 | -2.05665400 |
| H | -0.90929400 | 2.35980100 | -2.69061600 |
| H | -2.20959000 | 1.31438300 | -2.05551200 |
| C | -0.24512800 | 3.62243800 | -0.32248900 |
| H | 0.64153100  | 3.40115300 | 0.27761300  |

|    |             |             |             |
|----|-------------|-------------|-------------|
| H  | 0.05926700  | 4.10163800  | -1.25437800 |
| H  | -0.85692300 | 4.33764100  | 0.25093600  |
| C  | -0.77599900 | 1.76097500  | 1.89555000  |
| H  | -1.25438700 | 1.09153100  | 2.61301800  |
| H  | 0.29985900  | 1.55324300  | 1.90412400  |
| H  | -0.94454100 | 2.79419600  | 2.21758500  |
| C  | -2.81349500 | -0.63836100 | 0.03885400  |
| H  | -2.27331600 | -1.55740300 | -0.19582400 |
| C  | -4.28706400 | -0.70389400 | 0.07958300  |
| C  | -5.08173900 | 0.40478600  | 0.41929500  |
| C  | -4.91046600 | -1.92188000 | -0.23335200 |
| C  | -6.46832200 | 0.29334400  | 0.44268200  |
| H  | -4.60920500 | 1.35131800  | 0.66909400  |
| C  | -6.30058900 | -2.02918600 | -0.20933500 |
| H  | -4.30149500 | -2.78301100 | -0.49470500 |
| C  | -7.08247500 | -0.92351100 | 0.12777000  |
| H  | -7.07323300 | 1.15568700  | 0.70852800  |
| H  | -6.77072800 | -2.97737800 | -0.45347100 |
| H  | -8.16528200 | -1.00721800 | 0.14726200  |
| Cl | 0.40610800  | -1.35091000 | 0.44863500  |
| Ti | 2.53539500  | -0.54009700 | -0.35910600 |
| Cl | 1.40965900  | 1.04364500  | -1.62755100 |
| Cl | 2.78571200  | -2.31996100 | -1.66367600 |
| Cl | 4.54895000  | 0.39521200  | -0.81238000 |
| O  | 2.42870800  | 0.71964300  | 1.42113300  |
| O  | 3.30050900  | -1.27065700 | 1.38044000  |
| C  | 3.00348800  | -0.21862200 | 2.05024800  |
| C  | 3.31608100  | -0.14186100 | 3.51519500  |
| H  | 2.65285600  | -0.82698100 | 4.05593500  |
| H  | 4.34464500  | -0.47014000 | 3.69064600  |
| H  | 3.17270200  | 0.87458200  | 3.88587300  |

### 5\_Ph\_Cl

E(BS1) = -3423.339407 a.u.

G(BS1) = -3423.106061 a.u.

E(BS2,solvent) = -3423.747895 a.u.

|   |             |             |             |
|---|-------------|-------------|-------------|
| C | 1.26798500  | 2.06485500  | 0.61880500  |
| C | 1.84716300  | 0.87018000  | 0.40650900  |
| C | 0.73272100  | 2.76168200  | -0.50634900 |
| C | 0.89183500  | 2.26795700  | -1.89787900 |
| H | 0.00335300  | 1.66327800  | -2.14429900 |
| H | 0.92852000  | 3.10135900  | -2.60583900 |
| H | 1.75603400  | 1.61452300  | -2.02562800 |
| C | 0.15074900  | 4.12335200  | -0.34389100 |
| H | 0.97672900  | 4.84010300  | -0.49799500 |
| H | -0.59972600 | 4.32142900  | -1.11234200 |
| H | -0.27855200 | 4.29964900  | 0.64126600  |
| C | 1.10902500  | 2.60260100  | 2.03188000  |
| H | 0.04568500  | 2.64913600  | 2.29241000  |
| H | 1.61151300  | 1.94609500  | 2.74520100  |
| H | 1.53576600  | 3.60659600  | 2.13310400  |
| C | 2.35774400  | -0.31578500 | 0.23123900  |
| H | 1.60916500  | -1.11395500 | 0.26472000  |
| C | 3.76252800  | -0.69096000 | -0.00426000 |
| C | 4.80278000  | 0.25458000  | 0.01802000  |
| C | 4.06698400  | -2.03752700 | -0.25689200 |

|    |             |             |             |
|----|-------------|-------------|-------------|
| C  | 6.11666100  | -0.14200200 | -0.20977800 |
| H  | 4.57672700  | 1.29910500  | 0.21763400  |
| C  | 5.38521900  | -2.43090400 | -0.48534000 |
| H  | 3.26655400  | -2.77202800 | -0.27793500 |
| C  | 6.41210600  | -1.48596800 | -0.46234000 |
| H  | 6.91348400  | 0.59619900  | -0.18946100 |
| H  | 5.60812800  | -3.47565400 | -0.68152300 |
| H  | 7.43897600  | -1.79274900 | -0.63945200 |
| Cl | -1.95038000 | 1.79753800  | 0.07771800  |
| Ti | -2.41003900 | -0.59137500 | -0.24971600 |
| Cl | -1.15969700 | -0.56922300 | -2.15674700 |
| Cl | -4.49416300 | -0.13425400 | -0.84935600 |
| Cl | -2.61671600 | -2.84438900 | -0.22610200 |
| O  | -0.62636200 | -0.81583900 | 0.99630400  |
| O  | -2.63586700 | -0.60838800 | 1.79703700  |
| C  | -1.38997000 | -0.78585200 | 2.01126600  |
| C  | -0.88059600 | -0.97617400 | 3.41075800  |
| H  | 0.21019300  | -0.94120000 | 3.43573400  |
| H  | -1.30576900 | -0.21143600 | 4.06749400  |
| H  | -1.21944100 | -1.95101900 | 3.77974900  |

**TiCl<sub>3</sub>(OAc)**

E(BS1) = -2458.78188 a.u.

G(BS1) = -2458.768070 a.u.

E(BS2,solvent) = -2458.99343 a.u.

|    |             |             |             |
|----|-------------|-------------|-------------|
| O  | -2.68335600 | -1.16555900 | -0.01195200 |
| C  | -2.44439200 | 0.00969300  | -0.00017100 |
| O  | -1.13976000 | 0.47711600  | 0.00683900  |
| C  | -3.43645400 | 1.14170800  | 0.01164200  |
| H  | -4.44958900 | 0.73847100  | -0.00849000 |
| H  | -3.29235800 | 1.75143900  | 0.90994200  |
| H  | -3.27135900 | 1.79157500  | -0.85407000 |
| Ti | 0.57908300  | 0.03596400  | 0.00110100  |
| Cl | 0.93693400  | -1.38712300 | -1.60539400 |
| Cl | 1.75149800  | 1.85299900  | -0.32922300 |
| Cl | 1.08471500  | -0.84667400 | 1.92876300  |

**6\_Ph\_Cl**

E(BS1) = -964.576512 a.u.

G(BS1) = -964.378017 a.u.

E(BS2,solvent) = -964.768820 a.u.

|   |             |             |             |
|---|-------------|-------------|-------------|
| C | -2.22323900 | 0.11468800  | 0.42042200  |
| C | -0.80107900 | 0.45452300  | 0.14477500  |
| C | -2.88369700 | -0.79319200 | -0.33430500 |
| C | -2.29441300 | -1.45407800 | -1.55996600 |
| H | -2.15679300 | -2.53237900 | -1.39586700 |
| H | -2.98955100 | -1.35868900 | -2.40545000 |
| H | -1.33319300 | -1.03209100 | -1.85536500 |
| C | -4.30022500 | -1.24442200 | -0.05916500 |
| H | -4.96774900 | -0.93295900 | -0.87495700 |
| H | -4.34499900 | -2.34173700 | -0.02764900 |
| H | -4.71576100 | -0.87067800 | 0.87760700  |
| C | -2.80802300 | 0.85664800  | 1.60606400  |
| H | -2.31634000 | 0.54668700  | 2.53798100  |
| H | -2.63621400 | 1.93392100  | 1.50282200  |

|    |             |             |             |
|----|-------------|-------------|-------------|
| H  | -3.88223400 | 0.70421500  | 1.72048400  |
| C  | 0.22288700  | -0.40069800 | 0.32528500  |
| H  | -0.11230700 | -1.37008100 | 0.69294600  |
| C  | 1.68042600  | -0.31807300 | 0.16443300  |
| C  | 2.38133900  | 0.71182100  | -0.49470400 |
| C  | 2.43454800  | -1.38116300 | 0.70451100  |
| C  | 3.77140200  | 0.67678200  | -0.59158300 |
| H  | 1.84125600  | 1.53558200  | -0.94082800 |
| C  | 3.82298700  | -1.41136700 | 0.61118500  |
| H  | 1.91458600  | -2.19227500 | 1.20920400  |
| C  | 4.50076700  | -0.37775400 | -0.03840100 |
| H  | 4.28791300  | 1.48205900  | -1.10746300 |
| H  | 4.37470800  | -2.24253500 | 1.04232400  |
| H  | 5.58443200  | -0.39609600 | -0.11680200 |
| Cl | -0.56293200 | 2.14498700  | -0.36766400 |

### 7\_Ph\_Cl

E(BS1) = -964.577187 a.u.

G(BS1) = -964.377961 a.u.

E(BS2,solvent) = -964.769576 a.u.

|    |             |             |             |
|----|-------------|-------------|-------------|
| C  | 1.56344000  | 0.34851700  | 0.48890700  |
| C  | 0.98057700  | -0.95900700 | 0.08741500  |
| C  | 1.90676500  | 1.27203600  | -0.43570200 |
| C  | 1.70997400  | 1.05485200  | -1.91734700 |
| H  | 1.04148800  | 1.82141700  | -2.33326700 |
| H  | 2.66708300  | 1.15489900  | -2.44743300 |
| H  | 1.29044800  | 0.07500000  | -2.15106100 |
| C  | 2.52242600  | 2.61170300  | -0.10870000 |
| H  | 3.51377900  | 2.69720200  | -0.57490300 |
| H  | 1.91289500  | 3.42298300  | -0.53011700 |
| H  | 2.63836700  | 2.80157100  | 0.95936400  |
| C  | 1.76155800  | 0.46446100  | 1.98691500  |
| H  | 0.79788300  | 0.39464800  | 2.50809300  |
| H  | 2.37928600  | -0.36603600 | 2.35092100  |
| H  | 2.24349500  | 1.39630400  | 2.28828200  |
| C  | -0.29709200 | -1.32845300 | -0.10808500 |
| H  | -0.45964800 | -2.37500200 | -0.35605000 |
| C  | -1.53636600 | -0.53918500 | -0.03296700 |
| C  | -1.61274700 | 0.82983100  | 0.29164200  |
| C  | -2.74273800 | -1.21828100 | -0.29687300 |
| C  | -2.84286400 | 1.48108000  | 0.34871900  |
| H  | -0.70472000 | 1.38526500  | 0.49233100  |
| C  | -3.97190400 | -0.56533600 | -0.24146200 |
| H  | -2.70855700 | -2.27579600 | -0.54816200 |
| C  | -4.02856100 | 0.79107100  | 0.08280200  |
| H  | -2.87516900 | 2.53766700  | 0.60218900  |
| H  | -4.88467500 | -1.11672800 | -0.45102700 |
| H  | -4.98458900 | 1.30549900  | 0.12798200  |
| Cl | 2.21516700  | -2.25403700 | -0.04757200 |

### 8\_Ph\_Cl

E(BS1) = -964.565602 a.u.

G(BS1) = -964.365544 a.u.

E(BS2,solvent) = -964.7590836 a.u.

|   |             |             |            |
|---|-------------|-------------|------------|
| C | -1.44436500 | -0.10390000 | 0.73888300 |
|---|-------------|-------------|------------|

|    |             |             |             |
|----|-------------|-------------|-------------|
| C  | -0.28297800 | -0.66262600 | 0.48839000  |
| C  | -2.35217900 | 0.34846300  | -0.40295500 |
| C  | -1.74288700 | 0.14378300  | -1.78842600 |
| H  | -2.46398700 | 0.42422000  | -2.56095700 |
| H  | -0.85272700 | 0.77460700  | -1.89476400 |
| H  | -1.44708300 | -0.89582400 | -1.94403500 |
| C  | -2.83507200 | 1.79047500  | -0.21974600 |
| H  | -1.96881700 | 2.46427800  | -0.22911400 |
| H  | -3.50328600 | 2.07323000  | -1.03822400 |
| H  | -3.37122400 | 1.92655100  | 0.72189600  |
| C  | -1.90829500 | 0.11298100  | 2.16885700  |
| H  | -2.91015200 | -0.30591400 | 2.31466600  |
| H  | -1.22313900 | -0.36877900 | 2.87038000  |
| H  | -1.95317700 | 1.17995100  | 2.41892000  |
| C  | 0.88442100  | -1.22483400 | 0.26106700  |
| H  | 0.91888100  | -2.31262000 | 0.17144900  |
| C  | 2.17823900  | -0.53245900 | 0.10327500  |
| C  | 2.30161800  | 0.86389400  | 0.21432800  |
| C  | 3.33169500  | -1.28595200 | -0.16816500 |
| C  | 3.53845900  | 1.48220900  | 0.05650800  |
| H  | 1.41745000  | 1.45842000  | 0.42868800  |
| C  | 4.57127500  | -0.66601900 | -0.32615800 |
| H  | 3.25151600  | -2.36710000 | -0.25565000 |
| C  | 4.68021300  | 0.72079400  | -0.21501500 |
| H  | 3.61485100  | 2.56278800  | 0.14636000  |
| H  | 5.45162200  | -1.26781100 | -0.53598600 |
| H  | 5.64465800  | 1.20595800  | -0.33760800 |
| Cl | -3.88977900 | -0.73369500 | -0.33771000 |

### 1TS\_Ph\_Cl

E(BS1) = -3423.306283 a.u.

G(BS1) = -3423.069005 a.u.

E(BS2,solvent) = -3423.706921 a.u.

|   |             |             |             |
|---|-------------|-------------|-------------|
| C | -2.31827400 | -1.58841300 | -1.14254800 |
| C | -2.40933300 | -0.88537500 | -0.02671300 |
| C | -2.98317800 | -2.29659700 | 0.00349100  |
| C | -2.23569500 | -3.43768600 | 0.69032300  |
| H | -2.50355800 | -3.48787700 | 1.75475000  |
| H | -2.50685200 | -4.40378600 | 0.24659900  |
| H | -1.15104300 | -3.31701100 | 0.60897100  |
| C | -4.50445000 | -2.44792800 | 0.02609000  |
| H | -4.80918300 | -3.38178400 | -0.46332200 |
| H | -4.87408100 | -2.48331600 | 1.05893000  |
| H | -4.99975800 | -1.61573400 | -0.48457700 |
| C | -1.70716700 | -1.80601300 | -2.46520900 |
| H | -2.43616300 | -2.23384700 | -3.16404300 |
| H | -1.27213600 | -0.89362900 | -2.87999100 |
| H | -0.89215100 | -2.53471500 | -2.35045500 |
| C | -2.05158600 | 0.23771600  | 0.75895000  |
| H | -2.22821900 | 0.13306400  | 1.82542600  |
| C | -2.03791600 | 1.60701500  | 0.27507100  |
| C | -2.05774200 | 1.91894000  | -1.09854700 |
| C | -2.00163400 | 2.65521000  | 1.21770200  |
| C | -2.03447200 | 3.24458300  | -1.51316400 |
| H | -2.08542700 | 1.12065600  | -1.83033500 |
| C | -1.98406600 | 3.97967500  | 0.80026100  |

|    |             |             |             |
|----|-------------|-------------|-------------|
| H  | -1.97734100 | 2.41939600  | 2.27848800  |
| C  | -1.99752700 | 4.27451500  | -0.56702400 |
| H  | -2.03787900 | 3.47920100  | -2.57297500 |
| H  | -1.95156500 | 4.78096600  | 1.53191400  |
| H  | -1.97638900 | 5.30946000  | -0.89638800 |
| O  | -0.06754400 | -0.07312900 | 0.99037400  |
| C  | 0.56925800  | -0.49012200 | 2.02442100  |
| O  | 1.80948000  | -0.67348300 | 1.88894200  |
| C  | -0.10287400 | -0.75554700 | 3.34311300  |
| H  | -0.87816400 | -1.52009100 | 3.22221900  |
| H  | 0.63332900  | -1.09956100 | 4.07021500  |
| H  | -0.57765500 | 0.15917400  | 3.71491400  |
| Ti | 2.11001200  | -0.15858900 | -0.12639900 |
| Cl | 1.47568000  | -2.36820900 | -0.48039600 |
| Cl | 2.26899400  | 1.96799800  | 0.69655800  |
| Cl | 4.25616500  | -0.47857200 | -0.46306200 |
| Cl | 1.25259600  | 0.51239800  | -2.09906600 |

### 2TS\_Ph

E(BS1) = -504.087512 a.u.

G(BS1) = -503.888344 a.u.

E(BS2,solvent) = -504.289616 a.u.

|   |             |             |             |
|---|-------------|-------------|-------------|
| C | 2.06418500  | 0.86635000  | -0.16766800 |
| C | 1.07850100  | -0.00780500 | -0.29334000 |
| C | 2.63680600  | -0.37998400 | 0.31644300  |
| C | 2.50400700  | -0.83791400 | 1.75656300  |
| H | 2.38795000  | -1.92431300 | 1.81784500  |
| H | 3.43098900  | -0.57475200 | 2.28521600  |
| H | 1.67022900  | -0.35525600 | 2.27104800  |
| C | 3.72560100  | -1.04876700 | -0.49317500 |
| H | 4.70353600  | -0.83461500 | -0.04326100 |
| H | 3.60117600  | -2.13786900 | -0.47831400 |
| H | 3.74438000  | -0.71118300 | -1.53295000 |
| C | 2.54982500  | 2.11472600  | -0.80718900 |
| H | 3.42790600  | 1.90817700  | -1.43104300 |
| H | 1.77375100  | 2.58800200  | -1.41210100 |
| H | 2.87587300  | 2.81331100  | -0.02545200 |
| C | -0.05810800 | -0.68695100 | -0.59567000 |
| H | 0.07652400  | -1.63811500 | -1.11355200 |
| C | -1.40250000 | -0.32504800 | -0.26047700 |
| C | -1.71209100 | 0.86125300  | 0.45281200  |
| C | -2.45455300 | -1.17920400 | -0.67733600 |
| C | -3.03159300 | 1.18369200  | 0.72153300  |
| H | -0.90964500 | 1.50973500  | 0.79129200  |
| C | -3.77405900 | -0.84745200 | -0.40492600 |
| H | -2.21959000 | -2.09090400 | -1.21978100 |
| C | -4.06258400 | 0.33168500  | 0.29310700  |
| H | -3.27030900 | 2.09114200  | 1.26680800  |
| H | -4.57818500 | -1.49954900 | -0.72989500 |
| H | -5.09520100 | 0.58869800  | 0.51009500  |

### 3TS\_Ph\_Cl

E(BS1) = -3423.329325 a.u.

G(BS1) = -3423.093931 a.u.

E(BS2,solvent) = -3423.737633 a.u.

|    |             |             |             |
|----|-------------|-------------|-------------|
| C  | -0.64209000 | 2.55881600  | 0.75285400  |
| C  | -1.70297400 | 1.76289200  | 0.40731200  |
| C  | -0.16886600 | 3.48912200  | -0.18079900 |
| C  | -0.63371700 | 3.51768600  | -1.59226900 |
| H  | -0.74557000 | 4.54684300  | -1.95033300 |
| H  | 0.15478700  | 3.04280000  | -2.19784300 |
| H  | -1.54731100 | 2.94665200  | -1.75925200 |
| C  | 0.91804600  | 4.43404700  | 0.20054700  |
| H  | 1.86517200  | 3.87041500  | 0.16841900  |
| H  | 0.99763800  | 5.27331000  | -0.49395300 |
| H  | 0.81022300  | 4.80489200  | 1.22459300  |
| C  | -0.02311000 | 2.42059700  | 2.13585200  |
| H  | -0.21853100 | 3.31683600  | 2.73842700  |
| H  | -0.43380200 | 1.55303400  | 2.65143300  |
| H  | 1.05740700  | 2.27303000  | 2.05876400  |
| C  | -2.92248100 | 1.28968200  | 0.41773400  |
| H  | -3.57576100 | 2.05190400  | 0.86537400  |
| C  | -3.64783100 | 0.07354800  | 0.01984700  |
| C  | -3.03961600 | -1.06845700 | -0.52950800 |
| C  | -5.03907400 | 0.07069800  | 0.23600500  |
| C  | -3.81602800 | -2.18003600 | -0.85148500 |
| H  | -1.97409700 | -1.07536500 | -0.72389300 |
| C  | -5.80756400 | -1.04426700 | -0.08739400 |
| H  | -5.51835900 | 0.94922700  | 0.66194100  |
| C  | -5.19633900 | -2.17525000 | -0.63238200 |
| H  | -3.33463600 | -3.05348400 | -1.28183300 |
| H  | -6.87979200 | -1.02900800 | 0.08558600  |
| H  | -5.79222000 | -3.04726300 | -0.88697200 |
| Cl | 0.04656000  | 0.10528700  | -1.32459000 |
| Ti | 2.06727400  | -0.79201000 | -0.21052800 |
| Cl | 2.87393800  | 1.34541900  | -0.05747500 |
| Cl | 2.77180300  | -1.58003000 | -2.16404400 |
| Cl | 3.70163700  | -1.68159500 | 1.06051000  |
| O  | 0.84884000  | -0.60356700 | 1.55792800  |
| O  | 0.83571200  | -2.36888800 | 0.29172100  |
| C  | 0.41790000  | -1.77885800 | 1.34661900  |
| C  | -0.55094700 | -2.45885100 | 2.26985400  |
| H  | -1.53281700 | -2.51001700 | 1.78481800  |
| H  | -0.22013800 | -3.48401800 | 2.45919600  |
| H  | -0.63743400 | -1.90849000 | 3.20841900  |

### 3\_Et

E(BS1) = -351.683136 a.u.

G(BS1) = -351.507028 a.u.

E(BS2,solvent) = -351.851771 a.u.

|   |             |             |             |
|---|-------------|-------------|-------------|
| C | 0.95440000  | -0.61303400 | 0.09523300  |
| C | -0.37463400 | -0.51982400 | 0.36722100  |
| C | 1.70173900  | 0.58445000  | -0.00081500 |
| C | 1.11478900  | 1.93664800  | 0.16973100  |
| H | 1.64473100  | 2.45399200  | 0.98322000  |
| H | 1.32286600  | 2.53173400  | -0.73165800 |
| H | 0.04446400  | 1.93785600  | 0.37205400  |
| C | 3.15990600  | 0.50970000  | -0.28536200 |
| H | 3.33122500  | -0.00815200 | -1.24063400 |
| H | 3.63224500  | 1.49238700  | -0.32204000 |
| H | 3.66461900  | -0.10691400 | 0.47240900  |

|   |             |             |             |
|---|-------------|-------------|-------------|
| C | 1.60105300  | -1.97833900 | -0.08491300 |
| H | 2.37620400  | -2.14993800 | 0.67026500  |
| H | 0.85664300  | -2.77036700 | 0.00957300  |
| H | 2.06779700  | -2.06618600 | -1.07221400 |
| C | -1.64205100 | -0.51595800 | 0.61758900  |
| H | -1.94769900 | -0.53562600 | 1.66825900  |
| C | -2.75796000 | -0.47225700 | -0.42331800 |
| H | -2.32819600 | -0.46961400 | -1.42905400 |
| H | -3.32155300 | -1.40708600 | -0.31202600 |
| C | -3.68468500 | 0.73379000  | -0.21487600 |
| H | -3.14896700 | 1.68005700  | -0.34146300 |
| H | -4.49286000 | 0.70227800  | -0.95200600 |
| H | -4.13686400 | 0.72451800  | 0.78237600  |

### 3TS\_Et\_Cl

E(BS1) = -3270.913674 a.u.

G(BS1) = -3270.700006 a.u.

E(BS2,solvent) = -3271.280732 a.u.

|    |             |             |             |
|----|-------------|-------------|-------------|
| C  | -2.38998600 | 1.08588000  | 0.98993500  |
| C  | -2.91942000 | -0.09801600 | 0.57054600  |
| C  | -2.34429200 | 2.15454100  | 0.07626300  |
| C  | -2.68151600 | 1.99338200  | -1.36205700 |
| H  | -3.20233000 | 2.87761900  | -1.74550300 |
| H  | -1.72110800 | 1.92030000  | -1.89593500 |
| H  | -3.24318700 | 1.08504400  | -1.58014600 |
| C  | -1.99660400 | 3.53167000  | 0.53527400  |
| H  | -1.25724000 | 3.53593300  | 1.33673100  |
| H  | -1.63375600 | 4.14394800  | -0.29297200 |
| H  | -2.91754700 | 4.00225300  | 0.91920700  |
| C  | -1.88152000 | 1.20459200  | 2.41799900  |
| H  | -2.24203800 | 2.12082000  | 2.89561600  |
| H  | -2.22204100 | 0.35372100  | 3.01181500  |
| H  | -0.78670200 | 1.19854500  | 2.42303100  |
| C  | -3.64737700 | -1.15507200 | 0.37725800  |
| H  | -4.69974900 | -1.01024400 | 0.65096300  |
| C  | -3.29524400 | -2.51598900 | -0.18754800 |
| Cl | -0.44486500 | -0.90423200 | -1.08083700 |
| Ti | 1.70606000  | -0.02620500 | -0.35239100 |
| Cl | 0.79941700  | 2.09554700  | -0.40114600 |
| Cl | 2.57117200  | -0.38532800 | -2.36669600 |
| Cl | 3.61546300  | 0.68331000  | 0.63515000  |
| O  | 0.90424500  | -0.41080700 | 1.62585400  |
| O  | 2.00485800  | -1.87854800 | 0.46233200  |
| C  | 1.40620900  | -1.57211600 | 1.55226100  |
| C  | 1.34665100  | -2.55157600 | 2.68748000  |
| H  | 1.11162500  | -3.54999400 | 2.30822500  |
| H  | 2.33413500  | -2.60016900 | 3.16125600  |
| H  | 0.61056400  | -2.23652900 | 3.42944700  |
| H  | -2.21083200 | -2.60874500 | -0.24961000 |
| H  | -3.66964500 | -3.26482100 | 0.52244600  |
| C  | -3.93095300 | -2.74062700 | -1.56784400 |
| H  | -3.52219400 | -2.03690700 | -2.29922700 |
| H  | -3.70925700 | -3.75481400 | -1.91578700 |
| H  | -5.02071500 | -2.62265900 | -1.53983900 |

### 3'TS\_Et\_Cl



E(BS1) = -3270.914406 a.u.

G(BS1) = -3270.700600 a.u.

E(BS2,solvent) = -3271.276982 a.u.

|    |             |             |             |
|----|-------------|-------------|-------------|
| C  | -2.88633800 | -0.62062800 | 0.37687500  |
| C  | -2.66925700 | 0.71669700  | 0.09862800  |
| C  | -2.89341300 | -1.53215000 | -0.67332000 |
| C  | -2.63783900 | -1.17898000 | -2.09952800 |
| H  | -1.76097300 | -1.74404900 | -2.44168000 |
| H  | -3.48609900 | -1.50733400 | -2.71656100 |
| H  | -2.44210700 | -0.12109900 | -2.26447200 |
| C  | -3.21076600 | -2.97225700 | -0.39336200 |
| H  | -4.23825900 | -3.07333600 | -0.01665700 |
| H  | -3.10935400 | -3.58776400 | -1.28949100 |
| H  | -2.54622800 | -3.36916100 | 0.38208700  |
| C  | -3.08387300 | -1.05175300 | 1.81910200  |
| H  | -2.22114800 | -1.63085400 | 2.16687300  |
| H  | -3.18310400 | -0.18209100 | 2.47061600  |
| H  | -3.98070000 | -1.67174800 | 1.92778900  |
| C  | -2.91538900 | 1.92670400  | -0.31450300 |
| H  | -3.97386300 | 2.06010200  | -0.57053400 |
| C  | -2.03609900 | 3.14352400  | -0.47825900 |
| Cl | 0.36112600  | -2.32635300 | -0.27366900 |
| Ti | 1.33715700  | -0.31794800 | 0.12796200  |
| Cl | -0.36397500 | 0.91764000  | 1.28284900  |
| Cl | 0.54235100  | 0.59959200  | -1.86729700 |
| Cl | 2.16887100  | -0.92664200 | 2.15500700  |
| O  | 3.10868200  | -0.69323200 | -0.76674900 |
| C  | 3.54237600  | 0.49175700  | -0.51085800 |
| O  | 2.75009300  | 1.25812700  | 0.11252100  |
| C  | 4.91021400  | 0.91561200  | -0.94589200 |
| H  | 5.12824800  | 1.92316400  | -0.58900900 |
| H  | 5.65076500  | 0.20722300  | -0.56087800 |
| H  | 4.96296100  | 0.88689600  | -2.03983700 |
| H  | -0.99244600 | 2.82908900  | -0.50592800 |
| H  | -2.27663500 | 3.59044600  | -1.45090800 |
| C  | -2.26951800 | 4.17252700  | 0.63967800  |
| H  | -1.65346700 | 5.05979100  | 0.45987400  |
| H  | -3.31722900 | 4.49228500  | 0.68675800  |
| H  | -1.99092900 | 3.75576500  | 1.61211900  |

TiBr<sub>3</sub>(OAc)

E(BS1) = -8792.419874 a.u.

G(BS1) = -8792.407368 a.u.

E(BS2,solvent) = -8800.732222 a.u.

|    |             |             |             |
|----|-------------|-------------|-------------|
| O  | -2.14114000 | 0.01946200  | -0.47849600 |
| C  | -2.42323500 | 0.01056100  | 0.75567500  |
| O  | -1.41171600 | -0.00201400 | 1.56035600  |
| C  | -3.82135300 | 0.01364700  | 1.28158700  |
| H  | -4.53836000 | 0.02789100  | 0.45997500  |
| H  | -3.97457700 | -0.87489500 | 1.90351100  |
| H  | -3.96320200 | 0.88877800  | 1.92476600  |
| Ti | -0.09549500 | 0.00094600  | 0.04494200  |
| Br | 0.30801500  | -1.93657700 | -1.19117500 |
| Br | 0.33523100  | 1.94347200  | -1.17459000 |
| Br | 1.65582300  | -0.01682200 | 1.61846700  |

[TiBr<sub>4</sub>(OAc)]<sup>-</sup>

E(BS1) = -11363.95879 a.u.

G(BS1) = -11363.9495 a.u.

E(BS2,solvent) = -11375.07602 a.u.

|    |             |             |             |
|----|-------------|-------------|-------------|
| O  | -0.21327500 | 1.83988600  | 1.08792600  |
| C  | -0.30873800 | 2.48716600  | -0.00128200 |
| O  | -0.21308900 | 1.83892900  | -1.08987500 |
| C  | -0.57281800 | 3.96946500  | -0.00187500 |
| H  | -0.15066500 | 4.43001100  | 0.89469800  |
| H  | -0.15947700 | 4.42788300  | -0.90355000 |
| H  | -1.65789800 | 4.13040400  | 0.00354900  |
| Ti | 0.00743900  | 0.02973200  | -0.00011800 |
| Br | -2.49853400 | -0.04348800 | -0.00035400 |
| Br | 0.17207200  | -1.41287000 | 1.93464900  |
| Br | 0.17203900  | -1.41630000 | -1.93237600 |
| Br | 2.45455600  | 0.53515200  | -0.00070800 |

**8\_Ph\_Br**

E(BS1) = -3075.788519 a.u.

G(BS1) = -3075.591513 a.u.

E(BS2,solvent) = -3078.683954 a.u.

|    |             |             |             |
|----|-------------|-------------|-------------|
| C  | 1.02824100  | 0.95909500  | 0.49850100  |
| C  | 0.75690100  | -0.44383200 | 0.10179800  |
| C  | 1.15802300  | 1.93529200  | -0.42792500 |
| C  | 1.03101800  | 1.67300700  | -1.90979600 |
| H  | 0.19076100  | 2.24184500  | -2.33184100 |
| H  | 1.93365100  | 2.01442100  | -2.43473700 |
| H  | 0.87830900  | 0.61800000  | -2.14217500 |
| C  | 1.44665100  | 3.38112000  | -0.10185900 |
| H  | 2.39992800  | 3.68864700  | -0.55386800 |
| H  | 0.67516300  | 4.03015300  | -0.53867600 |
| H  | 1.49771300  | 3.59640500  | 0.96637800  |
| C  | 1.18842400  | 1.12322900  | 1.99667700  |
| H  | 0.25510300  | 0.86687200  | 2.51476400  |
| H  | 1.95677200  | 0.43320700  | 2.36664400  |
| H  | 1.47493900  | 2.13404500  | 2.29225200  |
| C  | -0.39740900 | -1.10180100 | -0.09806700 |
| H  | -0.31619100 | -2.15909200 | -0.33844200 |
| C  | -1.78608700 | -0.61706600 | -0.03242300 |
| C  | -2.17265000 | 0.70566700  | 0.26031000  |
| C  | -2.80490400 | -1.56045900 | -0.27270500 |
| C  | -3.51884500 | 1.05994000  | 0.31148200  |
| H  | -1.41445500 | 1.45816200  | 0.43933300  |
| C  | -4.15074700 | -1.20439300 | -0.22305300 |
| H  | -2.52975000 | -2.58767100 | -0.50016600 |
| C  | -4.51552200 | 0.11052300  | 0.07073500  |
| H  | -3.79150400 | 2.08715300  | 0.53978800  |
| H  | -4.91379300 | -1.95445300 | -0.41348900 |
| H  | -5.56385100 | 0.39350600  | 0.11090100  |
| Br | 2.39110400  | -1.51380400 | -0.02910600 |

**7\_Ph\_Br**

E(BS1) = -3075.777284 a.u.

G(BS1) = -3075.578597 a.u.

E(BS2,solvent) = -3078.674033 a.u.

|    |             |             |             |
|----|-------------|-------------|-------------|
| C  | -0.84879700 | 0.21464600  | 0.78833200  |
| C  | 0.27625900  | -0.44218200 | 0.61690200  |
| C  | -1.74242600 | 0.53804800  | -0.39893200 |
| C  | -1.16332200 | 0.11898600  | -1.74677400 |
| H  | -1.88530900 | 0.30903200  | -2.54517900 |
| H  | -0.25611100 | 0.70190600  | -1.95028100 |
| H  | -0.89778000 | -0.93995500 | -1.75868500 |
| C  | -2.19804600 | 1.99819700  | -0.41456500 |
| H  | -1.31740100 | 2.64488600  | -0.53015200 |
| H  | -2.87181100 | 2.17915200  | -1.25657500 |
| H  | -2.71637400 | 2.28042600  | 0.50392100  |
| C  | -1.27123900 | 0.67707600  | 2.17227900  |
| H  | -2.29560900 | 0.35113000  | 2.38481700  |
| H  | -0.60677000 | 0.26242700  | 2.93392100  |
| H  | -1.24319400 | 1.77018800  | 2.25729000  |
| C  | 1.40400100  | -1.10191100 | 0.46555100  |
| H  | 1.37300400  | -2.19079800 | 0.54375400  |
| C  | 2.73211700  | -0.52182700 | 0.18624400  |
| C  | 2.94056800  | 0.86555600  | 0.09138700  |
| C  | 3.83099200  | -1.37708100 | 0.00515700  |
| C  | 4.20668000  | 1.37641500  | -0.17866700 |
| H  | 2.09943200  | 1.53856500  | 0.23518300  |
| C  | 5.09995100  | -0.86477900 | -0.26535500 |
| H  | 3.68461200  | -2.45245500 | 0.07655100  |
| C  | 5.29335700  | 0.51409700  | -0.35922200 |
| H  | 4.34922700  | 2.45180800  | -0.24764700 |
| H  | 5.93702600  | -1.54416400 | -0.40287600 |
| H  | 6.28082800  | 0.91550600  | -0.56978000 |
| Br | -3.45698200 | -0.57854600 | -0.15566500 |

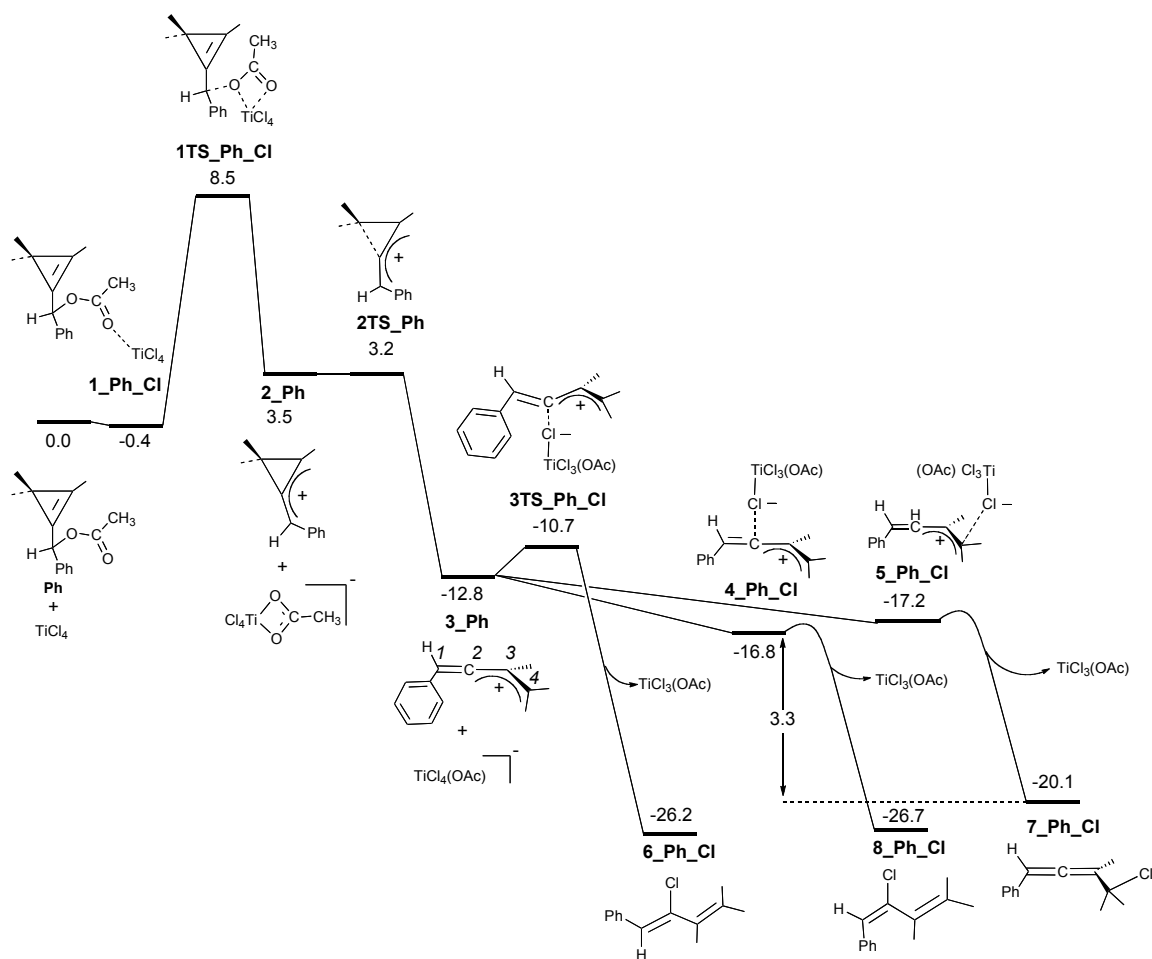

**Figure S1.** The DFT energy profile for the reaction of cyclopropenylmethyl acetate **1b** with  $\text{TiCl}_4$  redrawn with potential energies in kcal/mol.
